# Supplementary material for: Cu-Catalyzed synthesis of spiroimidazole derivatives via an indolyl mediated cyclization–rearrangement reaction
Source: Royal Society of Chemistry journal article supplement (doi:10.1039/d2qo01237e), 2022-01-01

## Supporting information

### Cu-catalyzed synthesis of spiro imidazole derivatives via indolyl mediated cyclization-rearrangement reaction

Shanping Chen,<sup>\*a,b</sup> Yi Xia,<sup>a</sup> Wei Feng,<sup>a</sup> Kuiyi You,<sup>b</sup> Guojiang Mao,<sup>c</sup>  
and Guo-Jun Deng<sup>\*a</sup>

<sup>a</sup> Key Laboratory for Green Organic Synthesis and Application of Hunan Province, Key Laboratory of Environmentally Friendly Chemistry and Application of Ministry of Education, College of Chemistry, Xiangtan University, Xiangtan 411105, China. E-mail: *spchen@xtu.edu.cn*; *gjdeng@xtu.edu.cn*.

<sup>b</sup> School of Chemical Engineering, Xiangtan University, Xiangtan 411105, China.

<sup>c</sup> School of Chemistry and Chemical Engineering, Henan Normal University Xinxiang, 453007, China.

## Table of Contents

|                                                                                                   |     |
|---------------------------------------------------------------------------------------------------|-----|
| 1. General information .....                                                                      | S2  |
| 2. General procedure for synthesis of 2-(indol-3-yl)cyclohexan-1-ones.....                        | S2  |
| 3. General procedure for the synthesis of products 3.....                                         | S3  |
| 4. Procedure for the gram-scale synthesis of 3aa.....                                             | S3  |
| 5. Characterization data of products.....                                                         | S4  |
| 6. References .....                                                                               | S21 |
| 7. Crystal data and structure refinement for 3aa.....                                             | S20 |
| 8. Copies of <sup>1</sup> H, <sup>13</sup> C and <sup>19</sup> F NMR spectra of all products..... | S29 |

## 1. General information

Unless otherwise noted, all commercially available reagents and solvents are reagent grade and were used without further purification. Column chromatography was performed using silica gel (200-300 mesh).  $^1\text{H}$  NMR,  $^{13}\text{C}$  NMR and  $^{19}\text{F}$  NMR spectra were recorded on Bruker-AV (400, 100 and 376 MHz, respectively) instrument internally referenced solvent signals. Mass spectra were measured on Agilent 5977 GC-MS instrument (EI). High-resolution mass spectra (HRMS) were performed on FTMS ICR MS BRUKER 7T or Agilent 6230 TOF LC/MS. Melting points were measured on BÜCHI B-545 melting point instrument and were uncorrected. X-ray crystal structure data was using collected on a SuperNova, Dual, Cu at zero, AtlasS2 diffractometer. The structures were solved by direct methods using Olex2 software. The structures of known compounds were further corroborated by comparing their NMR and MS data with those of literature.

## 2. General procedure for synthesis of 2-(indol-3-yl)cyclohexan-1-ones

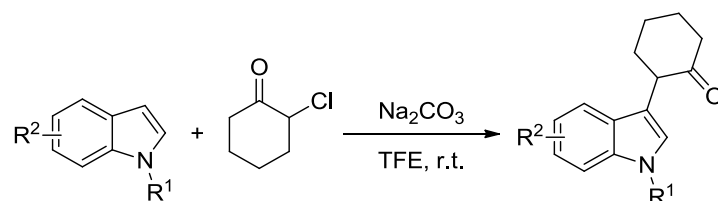

2-(indol-3-yl)cyclohexan-1-ones was prepared according to the previous literature.<sup>[1]</sup> Anhydrous  $\text{Na}_2\text{CO}_3$  (2.4 mmol, 1.2 equiv), 2-chlorocyclohexan-1-ones (2.0 mmol, 1.0 equiv), indoles (2.0 mmol, 1.0 equiv) and 2,2,2-trifluoroethanol (TFE, 3.0 mL) was added to a 20 mL oven-dried reaction vessel and stirred at r.t for 48 h. The volatiles were removed under reduced pressure. The residue was purified by flash chromatography to give 2-(indol-3-yl)cyclohexan-1-ones.

### 3. General procedure for the synthesis of products **3**

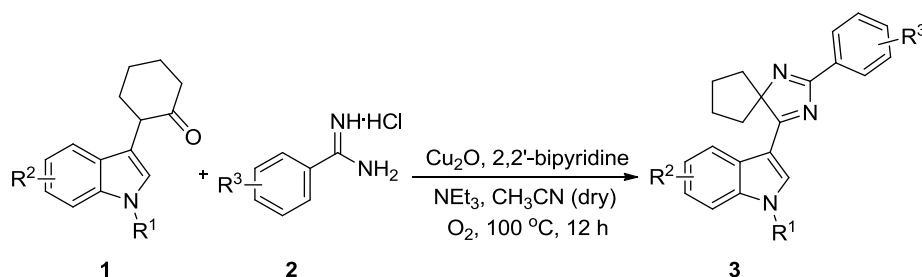

A 10 mL oven-dried reaction vessel was added with **1** (0.3 mmol, 1.5 equiv), benzamidine hydrochlorides **2** (0.2 mmol),  $\text{Cu}_2\text{O}$  (0.04 mmol, 20 mol%), 2,2'-bipyridine (0.04 mmol, 20 mol%),  $\text{NEt}_3$  (0.2 mmol, 1 equiv) and dry  $\text{CH}_3\text{CN}$  (0.5 mL). The sealed reaction vessel was stirred in an oil bath at 100 °C for 12 h, under  $\text{O}_2$  atmosphere. The reaction mixture was diluted with ethyl acetate and filtered. The volatiles were removed under reduced pressure and the residue was purified by column chromatography on silica gel to give products **3**.

### 4. Procedure for the gram-scale synthesis of **3aa**

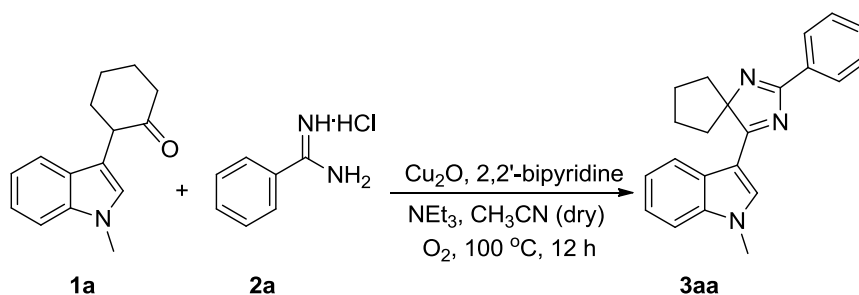

A 25 mL oven-dried reaction vessel was added with 2-(indol-3-yl)cyclohexan-1-one (**1a**, 1.702 g, 7.5 mmol), benzamidine hydrochloride (**2a**, 0.873 g, 5 mmol),  $\text{Cu}_2\text{O}$  (0.143 g, 1 mmol), 2,2'-bipyridine (0.156 g, 1 mmol),  $\text{NEt}_3$  (0.693 mL, 5 mmol) and dry  $\text{CH}_3\text{CN}$  (8 mL). The sealed reaction vessel was stirred in an oil bath at 100 °C for 12 h, under  $\text{O}_2$  atmosphere. The reaction mixture was diluted with ethyl acetate and filtered. The volatiles were removed under reduced pressure and the residue was purified by column chromatography on silica gel (petroleum ether/EtOAc = 5 : 1) to give the product **3aa** (1.062 g, 65% yield).

## 5. Characterization data of products

### 4-(1-Methyl-1*H*-indol-3-yl)-2-phenyl-1,3-diazaspiro[4.4]nona-1,3-diene (**3aa**)

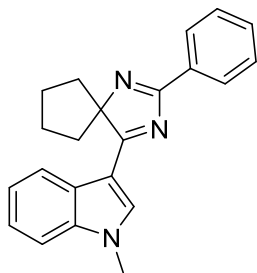

The reaction was conducted with benzamidine hydrochloride (31.3 mg, 0.2 mmol) and 2-(1-methyl-1*H*-indol-3-yl)cyclohexan-1-one (68.1 mg, 0.3 mmol). The residue was purified by column chromatography on silica gel (petroleum ether/EtOAc = 5:1) to yield the desired product **3aa** as pale-yellow solid (46.4 mg, 71% yield). mp: 173-175 °C.  $R_f$  = 0.45 (petroleum ether/EtOAc = 3:1).

$^1\text{H}$  NMR (400 MHz,  $\text{CDCl}_3$ )  $\delta$  8.87-8.84 (m, 1H), 8.48-8.46 (m, 2H), 7.61 (s, 1H), 7.52-7.50 (m, 3H), 7.44-7.39 (m, 3H), 3.93 (s, 3H), 2.35-2.30 (m, 2H), 2.19-2.10 (m, 6H);  $^{13}\text{C}$  NMR (100 MHz,  $\text{CDCl}_3$ )  $\delta$  192.8, 171.0, 137.4, 133.3, 133.2, 130.7, 129.2, 128.5, 126.8, 124.0, 123.7, 122.6, 109.6, 108.6, 91.3, 40.2, 33.8, 27.6. HRMS calcd. for  $\text{C}_{22}\text{H}_{21}\text{N}_3$   $[\text{M}+\text{H}]^+$  328.1808; found 328.1813.

### 4-(1-Methyl-1*H*-indol-3-yl)-2-(*p*-tolyl)-1,3-diazaspiro[4.4]nona-1,3-diene (**3ab**)

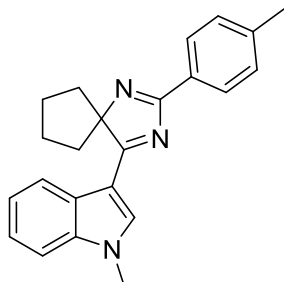

The reaction was conducted with 4-methylbenzamidine hydrochloride (34.1 mg, 0.2 mmol) and 2-(1-methyl-1*H*-indol-3-yl)cyclohexan-1-one (68.1 mg, 0.3 mmol). The residue was purified by column chromatography on silica gel (petroleum ether/EtOAc = 5:1) to yield the desired product **3ab** as pale-yellow solid (46.4 mg, 68% yield). mp: 171-173 °C.  $R_f$  = 0.47 (petroleum ether/EtOAc = 3:1).

$^1\text{H}$  NMR (400 MHz,  $\text{CDCl}_3$ )  $\delta$  8.86-8.84 (m, 1H), 8.35 (d,  $J$  = 8.0 Hz, 2H), 7.59 (s, 1H), 7.43-7.39 (m, 3H), 7.31 (d,  $J$  = 8.0 Hz, 2H), 3.93 (s, 3H), 2.44 (s, 3H), 2.34-2.29 (m, 2H), 2.18-2.09 (m, 6H);  $^{13}\text{C}$  NMR (100 MHz,  $\text{CDCl}_3$ )  $\delta$  192.5, 170.9, 140.8, 137.4, 133.2, 130.5, 129.2, 129.1, 126.8, 124.0, 123.7,

122.5, 109.5, 108.6, 91.3, 40.1, 33.8, 27.6, 21.8. HRMS calcd. for  $C_{23}H_{23}N_3$   $[M+H]^+$  342.1965; found 342.1971.

**2-(4-Fluorophenyl)-4-(1-methyl-1*H*-indol-3-yl)-1,3-diazaspiro[4.4]nona-1,3-diene (3ac)**

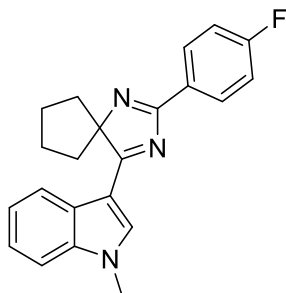

The reaction was conducted with 4-fluorobenzamidine hydrochloride (34.9 mg, 0.2 mmol) and 2-(1-methyl-1*H*-indol-3-yl)cyclohexan-1-one (68.1 mg, 0.3 mmol). The residue was purified by column chromatography on silica gel (petroleum ether/EtOAc = 5:1) to yield the desired product **3ac** as pale-yellow solid (42.8mg, 62% yield). mp: 186-188°C.  $R_f$  = 0.48 (petroleum ether/EtOAc = 3:1).

$^1H$  NMR (400 MHz,  $CDCl_3$ )  $\delta$  8.83-8.80 (m, 1H), 8.48-8.44 (m, 2H), 7.60 (s, 1H), 7.44-7.37 (m, 3H), 7.18 (t,  $J$  = 8.6 Hz, 2H), 3.93 (s, 3H), 2.33-2.31 (m, 2H), 2.18-2.06 (m, 6H);  $^{13}C$  NMR (100 MHz,  $CDCl_3$ )  $\delta$  192.9, 170.0, 164.5 (d,  $J$  = 248.2 Hz), 137.4, 133.3, 131.2 (d,  $J$  = 8.4 Hz), 129.6 (d,  $J$  = 2.6 Hz), 126.7, 123.9, 123.8, 122.6, 115.5 (d,  $J$  = 21.5 Hz), 109.6, 108.5, 91.6, 40.2, 33.8, 27.5.  $^{19}F$  NMR (376 MHz,  $CDCl_3$ )  $\delta$  -110.2. HRMS calcd. for  $C_{22}H_{20}FN_3$   $[M+H]^+$  346.1714; found 346.1719.

**2-(4-Chlorophenyl)-4-(1-methyl-1*H*-indol-3-yl)-1,3-diazaspiro[4.4]nona-1,3-diene (3ad)**

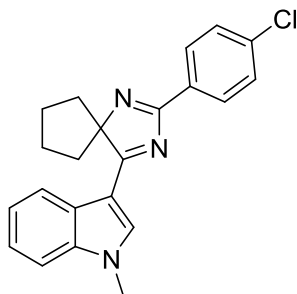

The reaction was conducted with 4-chlorobenzamidine hydrochloride (38.2 mg, 0.2 mmol) and 2-(1-methyl-1*H*-indol-3-yl)cyclohexan-1-one (68.1 mg, 0.3 mmol). The residue was purified by column chromatography on silica gel (petroleum ether/EtOAc = 5:1) to yield the desired product **3ad** as pale-yellow solid (46.3 mg, 64% yield). mp: 215-217°C.  $R_f$  = 0.48 (petroleum ether/EtOAc

= 3:1).

$^1\text{H}$  NMR (400 MHz,  $\text{CDCl}_3$ )  $\delta$  8.83-8.80 (m, 1H), 8.40 (d,  $J$  = 8.4 Hz, 2H), 7.60 (s, 1H), 7.47 (d,  $J$  = 8.4 Hz, 2H), 7.44-7.40 (m, 3H), 3.93 (s, 3H), 2.33-2.31 (m, 2H), 2.17-2.05 (m, 6H);  $^{13}\text{C}$  NMR (100 MHz,  $\text{CDCl}_3$ )  $\delta$  193.0, 170.0, 137.4, 136.5, 133.3, 131.9, 130.4, 128.7, 126.7, 123.9, 123.8, 122.6, 109.6, 108.5, 91.6, 40.2, 33.8, 27.5. HRMS calcd. for  $\text{C}_{22}\text{H}_{20}\text{ClN}_3$   $[\text{M}+\text{H}]^+$  362.1419; found 362.1424.

**2-(4-Bromophenyl)-4-(1-methyl-1*H*-indol-3-yl)-1,3-diazaspiro[4.4]nona-1,3-diene (3ae)**

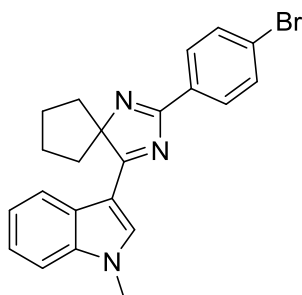

The reaction was conducted with 4-bromobenzamidine hydrochloride (47.1 mg, 0.2 mmol) and 2-(1-methyl-1*H*-indol-3-yl)cyclohexan-1-one (68.1 mg, 0.3 mmol). The residue was purified by column chromatography on silica gel (petroleum ether/EtOAc = 5:1) to yield the desired product **3ae** as pale-yellow solid (46.2 mg, 57% yield). mp: 223-225 °C.  $R_f$  = 0.48 (petroleum ether/EtOAc = 3:1).

$^1\text{H}$  NMR (400 MHz,  $\text{CDCl}_3$ )  $\delta$  8.82-8.80 (m, 1H), 8.33 (d,  $J$  = 8.4 Hz, 2H), 7.63 (d,  $J$  = 8.4 Hz, 2H), 7.60 (s, 1H), 7.44-7.40 (m, 3H), 3.93 (s, 3H), 2.33-2.28 (m, 2H), 2.19-2.05 (m, 6H);  $^{13}\text{C}$  NMR (100 MHz,  $\text{CDCl}_3$ )  $\delta$  193.0, 170.2, 137.4, 133.4, 131.7, 130.7, 128.7, 126.7, 125.2, 123.9, 123.8, 122.7, 109.6, 108.6, 91.6, 40.3, 33.8, 27.5. HRMS calcd. for  $\text{C}_{22}\text{H}_{20}\text{BrN}_3$   $[\text{M}+\text{H}]^+$  406.0913; found 406.0923.

**4-(1-Methyl-1*H*-indol-3-yl)-2-(4-(trifluoromethyl)phenyl)-1,3-diazaspiro[4.4]nona-1,3-diene (3af)**

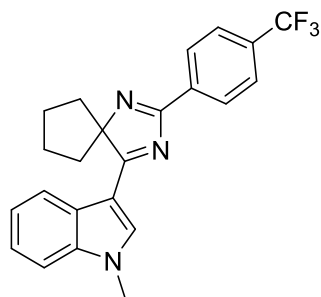

The reaction was conducted with 4-trifluoromethylbenzamidine hydrochloride (44.9 mg, 0.2 mmol) and 2-(1-methyl-1*H*-indol-3-yl)cyclohexan-1-one (68.1 mg, 0.3 mmol). The residue was purified by column chromatography on silica gel (petroleum ether/EtOAc = 5:1) to yield the desired product **3af** as pale-yellow solid (57.7 mg, 73% yield). mp: 212-214°C.  $R_f$  = 0.51 (petroleum ether/EtOAc = 3:1).

$^1\text{H}$  NMR (400 MHz,  $\text{CDCl}_3$ )  $\delta$  8.84-8.82 (m, 1H), 8.57 (d,  $J$  = 8.0 Hz, 2H), 7.76 (d,  $J$  = 8.4 Hz, 2H), 7.62 (s, 1H), 7.46-7.41 (m, 3H), 3.94 (s, 3H), 2.34-2.32 (m, 2H), 2.20-2.01 (m, 6H);  $^{13}\text{C}$  NMR (100 MHz,  $\text{CDCl}_3$ )  $\delta$  193.3, 169.9, 137.4, 136.7, 133.4, 132.1 (q,  $J$  = 32.0 Hz), 129.4, 126.7, 125.7, 125.4 (q,  $J$  = 3.7 Hz), 123.9, 123.0, 122.7, 109.7, 108.6, 91.8, 40.3, 33.8, 27.5.  $^{19}\text{F}$  NMR (376 MHz,  $\text{CDCl}_3$ )  $\delta$  -62.6. HRMS calcd. for  $\text{C}_{23}\text{H}_{20}\text{F}_3\text{N}_3$   $[\text{M}+\text{H}]^+$  396.1682; found 396.1695.

#### 2-(4-Methoxyphenyl)-4-(1-methyl-1*H*-indol-3-yl)-1,3-diazaspiro[4.4]nona-1,3-diene (**3ag**)

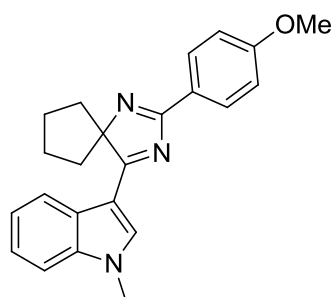

The reaction was conducted with 4-methoxyphenylformamidine hydrochloride (37.2 mg, 0.2 mmol) and 2-(1-methyl-1*H*-indol-3-yl)cyclohexan-1-one (68.1 mg, 0.3 mmol). The residue was purified by column chromatography on silica gel (petroleum ether/EtOAc = 2:1) to yield the desired product **3ag** as pale-yellow solid (54.3 mg, 76% yield). mp: 120-122°C.  $R_f$  = 0.39 (petroleum ether/EtOAc = 1:1).

$^1\text{H}$  NMR (400 MHz,  $\text{CDCl}_3$ )  $\delta$  8.84 (d,  $J$  = 8.8 Hz, 1H), 8.43 (d,  $J$  = 8.8 Hz, 2H), 7.59 (s, 1H), 7.42-7.39 (m, 3H), 7.02 (d,  $J$  = 8.8 Hz, 2H), 3.91 (s, 3H), 3.88 (s, 3H), 2.34-2.28 (m, 2H), 2.16-2.09 (m, 6H);

$^{13}\text{C}$  NMR (100 MHz,  $\text{CDCl}_3$ )  $\delta$  192.4, 170.5, 161.7, 137.4, 133.2, 130.8, 126.8, 125.9, 124.0, 123.7, 122.5, 113.8, 109.6, 108.6, 91.2, 55.5, 40.2, 33.7, 27.5. HRMS calcd. for  $\text{C}_{23}\text{H}_{23}\text{N}_3\text{O}$   $[\text{M}+\text{H}]^+$  358.1914; found 358.1923.

**4-(1-Methyl-1*H*-indol-3-yl)-2-(4-nitrophenyl)-1,3-diazaspiro[4.4]nona-1,3-diene (3ah)**

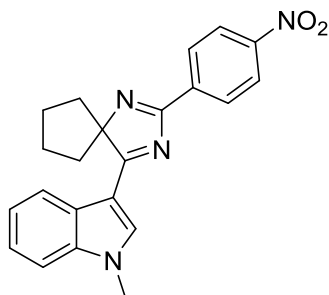

The reaction was conducted with 4-nitrobenzamidinium hydrochloride (40.3 mg, 0.2 mmol) and 2-(1-methyl-1*H*-indol-3-yl)cyclohexan-1-one (68.1 mg, 0.3 mmol). The residue was purified by column chromatography on silica gel (petroleum ether/EtOAc = 2:1) to yield the desired product **3ah** as pale-yellow solid (46.1 mg, 62 % yield). mp: 281-283°C.  $R_f$  = 0.34 (petroleum ether/EtOAc = 1:1).

$^1\text{H}$  NMR (400 MHz,  $\text{CDCl}_3$ )  $\delta$  8.82-8.79 (m, 1H), 8.61 (d,  $J$  = 8.8 Hz, 2H), 8.33 (d,  $J$  = 8.8 Hz, 2H), 7.63 (s, 1H), 7.46-7.41 (m, 3H), 3.95 (s, 3H), 2.40-2.32 (m, 2H), 2.19-2.10 (m, 6H);  $^{13}\text{C}$  NMR (100 MHz,  $\text{CDCl}_3$ )  $\delta$  193.6, 169.3, 149.1, 139.3, 137.5, 133.7, 129.9, 124.0, 123.8, 123.7, 122.8, 109.7, 108.5, 92.2, 40.4, 33.9, 27.5. HRMS calcd. for  $\text{C}_{22}\text{H}_{20}\text{N}_4\text{O}_2$   $[\text{M}+\text{H}]^+$  373.1659; found 373.1670.

**4-(1-Methyl-1*H*-indol-3-yl)-2-(*m*-tolyl)-1,3-diazaspiro[4.4]nona-1,3-diene (3ai)**

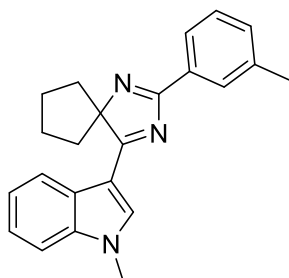

The reaction was conducted with 3-methylbenzamidinium hydrochloride (34.1 mg, 0.2 mmol) and 2-(1-methyl-1*H*-indol-3-yl)cyclohexan-1-one (68.1 mg, 0.3 mmol). The residue was purified by column chromatography on silica gel (petroleum ether/EtOAc = 5:1) to yield the desired product **3ai** as pale-yellow solid (44.3 mg, 65 % yield). mp: 203-205°C.  $R_f$  = 0.46 (petroleum ether/EtOAc

= 3:1).

$^1\text{H}$  NMR (400 MHz,  $\text{CDCl}_3$ )  $\delta$  8.86 (d,  $J = 7.2$  Hz, 1H), 8.30 (d,  $J = 7.6$  Hz, 1H), 8.26 (s, 1H), 7.59 (s, 1H), 7.45-7.40 (m, 4H), 7.31 (d,  $J = 7.6$  Hz, 1H), 3.91 (s, 3H), 2.48 (s, 3H), 2.35-2.33 (m, 2H), 2.18-2.10 (m, 6H);  $^{13}\text{C}$  NMR (100 MHz,  $\text{CDCl}_3$ )  $\delta$  192.6, 171.1, 138.1, 137.4, 133.2, 131.4, 129.3, 128.4, 126.8, 126.5, 124.0, 123.7, 122.5, 109.5, 108.6, 91.3, 40.1, 33.7, 27.6, 21.6. HRMS calcd. for  $\text{C}_{23}\text{H}_{23}\text{N}_3$   $[\text{M}+\text{H}]^+$  342.1965; found 342.1973.

**2-(3-Bromophenyl)-4-(1-methyl-1*H*-indol-3-yl)-1,3-diazaspiro[4.4]nona-1,3-diene (3aj)**

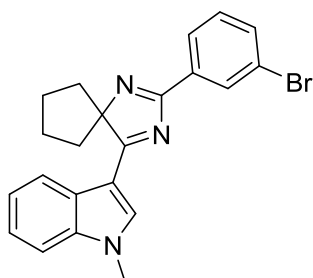

The reaction was conducted with 3-bromobenzamidine hydrochloride (47.1 mg, 0.2 mmol) and 2-(1-methyl-1*H*-indol-3-yl)cyclohexan-1-one (68.1 mg, 0.3 mmol). The residue was purified by column chromatography on silica gel (petroleum ether/EtOAc = 5:1) to yield the desired product **3aj** as pale-yellow solid (56.7 mg, 70 % yield). mp: 191-193 °C.  $R_f$  = 0.47 (petroleum ether/EtOAc = 3:1).

$^1\text{H}$  NMR (400 MHz,  $\text{CDCl}_3$ )  $\delta$  8.81 (d,  $J = 7.2$  Hz, 1H), 8.59 (s, 1H), 8.41 (d,  $J = 8.8$  Hz, 1H), 7.63-7.60 (m, 2H), 7.45-7.36 (m, 4H), 3.92 (s, 3H), 2.33-2.31 (m, 2H), 2.16-2.01 (m, 6H);  $^{13}\text{C}$  NMR (100 MHz,  $\text{CDCl}_3$ )  $\delta$  193.1, 169.7, 137.4, 135.4, 133.5, 133.4, 131.8, 130.0, 127.8, 126.7, 123.9, 123.8, 122.7, 109.6, 108.5, 91.3, 40.3, 33.8, 27.5. HRMS calcd. for  $\text{C}_{22}\text{H}_{20}\text{BrN}_3$   $[\text{M}+\text{H}]^+$  406.0913; found 406.0926.

**2-(2-Bromophenyl)-4-(1-methyl-1*H*-indol-3-yl)-1,3-diazaspiro[4.4]nona-1,3-diene (3ak)**

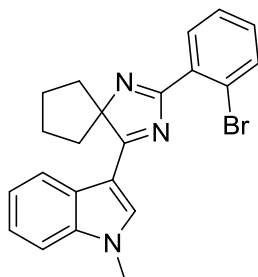

The reaction was conducted with 2-bromobenzamidine hydrochloride (47.1 mg, 0.2 mmol) and 2-

(1-methyl-1*H*-indol-3-yl)cyclohexan-1-one (68.1 mg, 0.3 mmol). The residue was purified by column chromatography on silica gel (petroleum ether/EtOAc = 5:1) to yield the desired product **3ak** as pale-yellow solid (43.7 mg, 54 % yield). mp: 188-190°C.  $R_f$  = 0.47 (petroleum ether/EtOAc = 3:1).

$^1\text{H}$  NMR (400 MHz,  $\text{CDCl}_3$ )  $\delta$  8.77-8.75 (m, 1H), 8.03-8.01 (m, 1H), 7.61 (s, 1H), 7.52-7.49 (m, 1H), 7.41-7.35 (m, 5H), 3.93 (s, 3H), 2.5-2.01 (m, 2H), 2.21-2.15 (m, 6H);  $^{13}\text{C}$  NMR (100 MHz,  $\text{CDCl}_3$ )  $\delta$  192.4, 170.3, 137.4, 133.9, 133.3, 132.0, 130.7, 130.6, 126.7, 126.6, 124.0, 123.8, 122.6, 109.5, 108.6, 91.6, 40.1, 33.8, 27.5. HRMS calcd. for  $\text{C}_{22}\text{H}_{20}\text{BrN}_3$   $[\text{M}+\text{Na}]^+$  428.0733; found 428.0747.

#### 4-(1-Methyl-1*H*-indol-3-yl)-2-(pyridin-4-yl)-1,3-diazaspiro[4.4]nona-1,3-diene (**3al**)

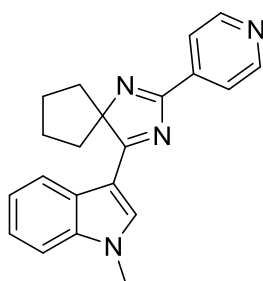

The reaction was conducted with 4-carbamimidoylpyridine hydrochloride (31.5 mg, 0.2 mmol) and 2-(1-methyl-1*H*-indol-3-yl)cyclohexan-1-one (68.1 mg, 0.3 mmol). The residue was purified by column chromatography on silica gel (petroleum ether/EtOAc = 2:1) to yield the desired product **3al** as pale-yellow solid (40.0 mg, 61% yield). mp: 197-199°C.  $R_f$  = 0.48 (petroleum ether/EtOAc = 1:1).

$^1\text{H}$  NMR (400 MHz,  $\text{CDCl}_3$ )  $\delta$  8.81-8.78 (m, 3H), 8.28 (d,  $J$  = 6.0 Hz, 2H), 7.63 (s, 1H), 7.44-7.41 (m, 3H), 3.95 (s, 3H), 2.34-2.32 (m, 2H), 2.18-2.09 (m, 6H);  $^{13}\text{C}$  NMR (100 MHz,  $\text{CDCl}_3$ )  $\delta$  193.7, 169.5, 150.4, 140.6, 137.5, 133.6, 126.7, 124.0, 123.9, 123.0, 122.8, 109.7, 108.6, 92.0, 40.4, 33.9, 27.5. HRMS calcd. for  $\text{C}_{21}\text{H}_{20}\text{N}_4$   $[\text{M}+\text{H}]^+$  329.1761; found 329.1780.

#### 4-(1-Ethyl-1*H*-indol-3-yl)-2-phenyl-1,3-diazaspiro[4.4]nona-1,3-diene (**3ba**)

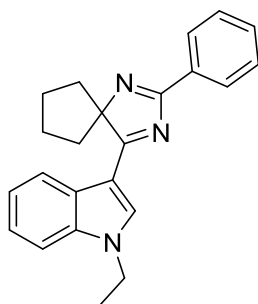

The reaction was conducted with benzamidine hydrochloride (31.3 mg, 0.2 mmol) and 2-(1-ethyl-1*H*-indol-3-yl)cyclohexan-1-one (72.0 mg, 0.3 mmol). The residue was purified by column chromatography on silica gel (petroleum ether/EtOAc = 5:1) to yield the desired product **3ba** as pale-yellow solid (49.1 mg, 72 % yield). mp: 169-171 °C.  $R_f$  = 0.52 (petroleum ether/EtOAc = 3:1).  $^1\text{H}$  NMR (400 MHz,  $\text{CDCl}_3$ )  $\delta$  8.87 (d,  $J$  = 6.4 Hz, 1H), 8.48-8.46 (m, 2H), 7.65 (s, 1H), 7.54-7.50 (m, 3H), 7.44-7.36 (m, 3H), 4.30 (q,  $J$  = 7.3 Hz, 2H), 2.35-2.30 (m, 2H), 2.19-2.10 (m, 6H), 1.58 (t,  $J$  = 7.2 Hz, 3H);  $^{13}\text{C}$  NMR (100 MHz,  $\text{CDCl}_3$ )  $\delta$  192.7, 170.9, 136.5, 133.3, 131.5, 130.6, 129.1, 128.5, 127.0, 124.1, 123.6, 122.5, 109.7, 108.8, 91.4, 42.0, 40.2, 27.6, 15.5. HRMS calcd. for  $\text{C}_{23}\text{H}_{23}\text{N}_3$   $[\text{M}+\text{H}]^+$  342.1965; found 342.1980.

**4-(1-Isopropyl-1*H*-indol-3-yl)-2-phenyl-1,3-diazaspiro[4.4]nona-1,3-diene (3ca)**

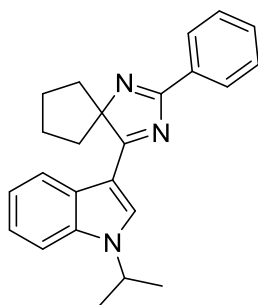

The reaction was conducted with benzamidine hydrochloride (31.3 mg, 0.2 mmol) and 2-(1-isopropyl-1*H*-indol-3-yl)cyclohexan-1-one (76.6 mg, 0.3 mmol). The residue was purified by column chromatography on silica gel (petroleum ether/EtOAc = 5:1) to yield the desired product **3ca** as pale-yellow solid (53.2 mg, 75 % yield). mp: 98-100 °C.  $R_f$  = 0.55 (petroleum ether/EtOAc = 3:1).

$^1\text{H}$  NMR (400 MHz,  $\text{CDCl}_3$ )  $\delta$  8.88 (d,  $J$  = 6.8 Hz, 1H), 8.49-8.46 (m, 2H), 7.74 (s, 1H), 7.54-7.51 (m, 3H), 7.46 (d,  $J$  = 7.6 Hz, 1H), 7.42-7.35 (m, 2H), 4.80-4.74 (m, 1H), 2.35-2.3 (m, 2H), 2.21-2.12 (m, 6H), 1.65 (s, 3H), 1.63 (s, 3H);  $^{13}\text{C}$  NMR (100 MHz,  $\text{CDCl}_3$ )  $\delta$  192.8, 171.0, 136.4, 133.3, 130.6, 129.1, 128.5, 128.3, 127.0, 124.1, 123.4, 122.5, 109.9, 108.8, 91.3, 48.1, 40.2, 27.7, 22.8. HRMS calcd. for  $\text{C}_{24}\text{H}_{25}\text{N}_3$   $[\text{M}+\text{H}]^+$  356.2121; found 356.2133.

**2-Phenyl-4-(1-phenyl-1*H*-indol-3-yl)-1,3-diazaspiro[4.4]nona-1,3-diene (3da)**

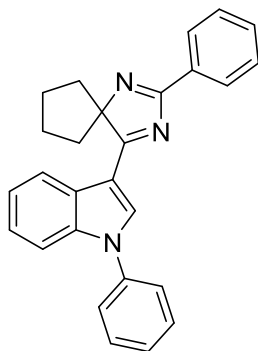

The reaction was conducted with benzamidine hydrochloride (31.3 mg, 0.2 mmol) and 2-(1-phenyl-1*H*-indol-3-yl)cyclohexan-1-one (86.7 mg, 0.3 mmol). The residue was purified by column chromatography on silica gel (petroleum ether/EtOAc = 5:1) to yield the desired product **3da** as pale-yellow solid (42.8 mg, 55 % yield). mp: 206-208 °C.  $R_f$  = 0.59 (petroleum ether/EtOAc = 3:1).  $^1\text{H}$  NMR (400 MHz,  $\text{CDCl}_3$ )  $\delta$  8.94 (d,  $J$  = 8.0 Hz, 1H), 8.50-8.48 (m, 2H), 7.84 (s, 1H), 7.64-7.44 (m, 10H), 7.38 (t,  $J$  = 7.6 Hz, 1H), 2.34-2.31 (m, 2H), 2.26-2.19 (m, 2H), 2.15-2.09 (m, 4H);  $^{13}\text{C}$  NMR (100 MHz,  $\text{CDCl}_3$ )  $\delta$  192.7, 171.0, 138.7, 137.0, 132.1, 130.8, 130.1, 129.2, 129.2, 128.6, 128.1, 127.3, 125.1, 124.4, 124.3, 123.1, 110.8, 110.6, 91.7, 40.0, 27.6. HRMS calcd. for  $\text{C}_{27}\text{H}_{23}\text{N}_3$   $[\text{M}+\text{Na}]^+$  412.1784; found 412.1798.

#### 4-(1-Benzyl-1*H*-indol-3-yl)-2-phenyl-1,3-diazaspiro[4.4]nona-1,3-diene (3ea)

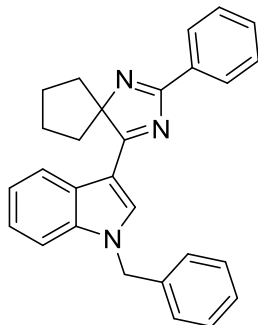

The reaction was conducted with benzamidine hydrochloride (31.3 mg, 0.2 mmol) and 2-(1-benzyl-1*H*-indol-3-yl)cyclohexan-1-one (90.9mg, 0.3 mmol). The residue was purified by column chromatography on silica gel (petroleum ether/EtOAc = 5:1) to yield the desired product **3ea** as pale-yellow solid (50.8 mg, 63 % yield). mp: 110-112 °C.  $R_f$  = 0.58 (petroleum ether/EtOAc = 3:1).  $^1\text{H}$  NMR (400 MHz,  $\text{CDCl}_3$ )  $\delta$  8.88 (d,  $J$  = 8.0 Hz, 1H), 8.49-8.47 (m, 2H), 7.65 (s, 1H), 7.51 (d,  $J$  = 4.0 Hz, 3H), 7.43-7.39 (m, 1H), 7.36-7.34 (m, 5H), 7.16 (d,  $J$  = 6.8 Hz, 2H), 5.45 (s, 2H), 2.30-2.26 (m, 2H), 2.13-2.10 (m, 4H), 2.06-2.02 (m, 2H);  $^{13}\text{C}$  NMR (100 MHz,  $\text{CDCl}_3$ )  $\delta$  192.8, 171.0, 137.1, 136.0, 133.2, 132.7, 130.7, 129.2, 129.2, 128.5, 128.3, 127.0, 126.9, 124.1, 123.9, 122.7, 110.2, 91.4, 50.9,

40.2, 27.5. HRMS calcd. for C<sub>28</sub>H<sub>25</sub>N<sub>3</sub> [M+Na]<sup>+</sup> 426.1941; found 426.1953.

**4-(1*H*-indol-3-yl)-2-phenyl-1,3-diazaspiro[4.4]nona-1,3-diene (3fa)**

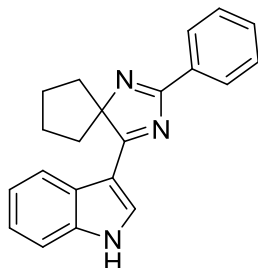

The reaction was conducted with benzamidine hydrochloride (31.3 mg, 0.2 mmol) and 2-(1*H*-indol-3-yl)cyclohexan-1-one (63.9mg, 0.3 mmol). The residue was purified by column chromatography on silica gel (petroleum ether/EtOAc = 2:1) to yield the desired product **3fa** as pale-yellow solid (40.1 mg, 64 % yield). mp: 268-270°C. R<sub>f</sub> = 0.38 (petroleum ether/EtOAc = 1:1). <sup>1</sup>H NMR (400 MHz, CDCl<sub>3</sub>) δ 9.49 (s, 1H), 8.85 (d, *J* = 7.6 Hz, 1H), 8.49-8.46 (m, 2H), 7.69 (s, 1H), 7.52-7.50 (m, 3H), 7.42-7.31 (m, 3H), 2.29-2.27 (m, 2H), 2.11-2.04 (m, 6H); <sup>13</sup>C NMR (100 MHz, CDCl<sub>3</sub>) δ 193.4, 171.2, 136.4, 133.0, 131.0, 129.7, 129.2, 128.7, 126.0, 124.0, 123.6, 122.6, 111.6, 109.7, 91.5, 40.2, 27.5. HRMS calcd. for C<sub>21</sub>H<sub>19</sub>N<sub>3</sub> [M+Na]<sup>+</sup> 336.1471; found 336.1483.

**4-(1,4-Dimethyl-1*H*-indol-3-yl)-2-phenyl-1,3-diazaspiro[4.4]nona-1,3-diene (3ga)**

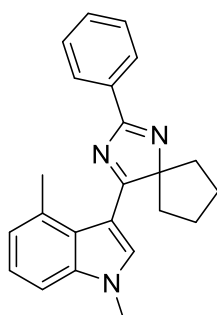

The reaction was conducted with benzamidine hydrochloride (31.3 mg, 0.2 mmol) and 2-(1,4-dimethyl-1*H*-indol-3-yl)cyclohexan-1-one (72.0 mg, 0.3 mmol). The residue was purified by column chromatography on silica gel (petroleum ether/EtOAc = 5:1) to yield the desired product **3ga** as pale-yellow solid (38.9 mg, 57 % yield). mp: 91-93°C. R<sub>f</sub> = 0.47 (petroleum ether/EtOAc = 3:1).

<sup>1</sup>H NMR (400 MHz, CDCl<sub>3</sub>) δ 8.39-8.37 (m, 2H), 7.55 (s, 1H), 7.49-7.47 (m, 3H), 7.29-7.21 (m, 2H), 7.09 (d, *J* = 6.8 Hz, 1H), 3.89 (s, 3H), 2.97 (s, 3H), 2.30-2.17 (m, 4H), 2.10-2.05 (m, 4H); <sup>13</sup>C NMR

(100 MHz, CDCl<sub>3</sub>)  $\delta$  193.3, 170.3, 138.0, 133.8, 133.1, 132.8, 130.7, 129.1, 128.6, 125.6, 124.5, 123.7, 110.0, 107.3, 92.7, 38.8, 33.9, 27.6, 23.9. HRMS calcd. for C<sub>23</sub>H<sub>23</sub>N<sub>3</sub> [M+H]<sup>+</sup> 342.1965; found 342.1978.

**4-(1,5-Dimethyl-1*H*-indol-3-yl)-2-phenyl-1,3-diazaspiro[4.4]nona-1,3-diene (3ha)**

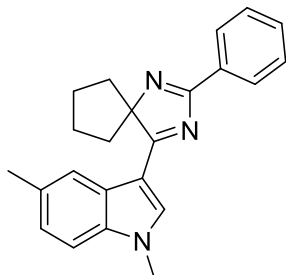

The reaction was conducted with benzamidine hydrochloride (31.3 mg, 0.2 mmol) and 2-(1,5-dimethyl-1*H*-indol-3-yl)cyclohexan-1-one (72.0 mg, 0.3 mmol). The residue was purified by column chromatography on silica gel (petroleum ether/EtOAc = 5:1) to yield the desired product **3ha** as pale-yellow solid (47.0 mg, 69 % yield). mp: 200-202°C. R<sub>f</sub> = 0.48 (petroleum ether/EtOAc = 3:1).

<sup>1</sup>H NMR (400 MHz, CDCl<sub>3</sub>)  $\delta$  8.63 (s, 1H), 8.48-8.46 (m, 2H), 7.56 (s, 1H), 7.54-7.50 (m, 3H), 7.28 (d, *J* = 8.0 Hz, 1H), 7.21 (d, *J* = 8.4 Hz, 1H), 3.89 (s, 3H), 2.60 (s, 3H), 2.35-2.32 (m, 2H), 2.18-2.07 (m, 6H); <sup>13</sup>C NMR (100 MHz, CDCl<sub>3</sub>)  $\delta$  192.7, 170.9, 136.5, 133.4, 131.5, 130.6, 129.1, 128.5, 127.0, 124.2, 123.6, 122.5, 109.7, 108.8, 91.4, 42.0, 40.2, 27.6, 15.5. HRMS calcd. for C<sub>23</sub>H<sub>23</sub>N<sub>3</sub> [M+H]<sup>+</sup> 342.1965; found 342.1976.

**4-(5-Fluoro-1-methyl-1*H*-indol-3-yl)-2-phenyl-1,3-diazaspiro[4.4]nona-1,3-diene (3ia)**

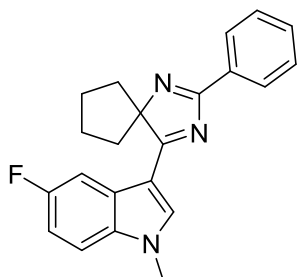

The reaction was conducted with benzamidine hydrochloride (31.3 mg, 0.2 mmol) and 2-(5-fluoro-1-methyl-1*H*-indol-3-yl)cyclohexan-1-one (73.5 mg, 0.3 mmol). The residue was purified by column chromatography on silica gel (petroleum ether/EtOAc = 5:1) to yield the desired product **3ia** as pale-yellow solid (45.5 mg, 66 % yield). mp: 208-210°C. R<sub>f</sub> = 0.48 (petroleum

ether/EtOAc = 3:1).

$^1\text{H}$  NMR (400 MHz,  $\text{CDCl}_3$ )  $\delta$  8.54-8.51 (m, 1H), 8.46-8.43 (m, 2H), 7.61 (s, 1H), 7.54-7.50 (m, 3H), 7.32-7.29 (m, 1H), 7.12 (t,  $J$  = 9.0 Hz, 1H), 3.91 (s, 3H), 2.34-2.28 (m, 2H), 2.11-2.05 (m, 6H);  $^{13}\text{C}$  NMR (100 MHz,  $\text{CDCl}_3$ )  $\delta$  192.4, 170.8, 159.7 (d,  $J$  = 235.9 Hz), 134.2, 134.0, 133.2, 130.7, 129.1, 128.5, 127.5 (d,  $J$  = 11.4 Hz), 112.1 (d,  $J$  = 26.6 Hz), 110.4 (d,  $J$  = 9.5 Hz), 109.3 (d,  $J$  = 24.9 Hz), 108.6 (d,  $J$  = 4.1 Hz), 91.4, 40.0, 34.1, 27.5.  $^{19}\text{F}$  NMR (376 MHz,  $\text{CDCl}_3$ )  $\delta$  -121.1. HRMS calcd. for  $\text{C}_{22}\text{H}_{20}\text{FN}_3$   $[\text{M}+\text{H}]^+$  346.1714; found 346.1725.

#### 4-(5-Chloro-1-methyl-1*H*-indol-3-yl)-2-phenyl-1,3-diazaspiro[4.4]nona-1,3-diene (3ja)

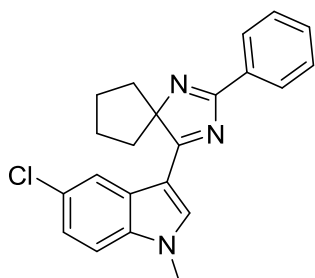

The reaction was conducted with benzamidine hydrochloride (31.3 mg, 0.2 mmol) and 2-(5-chloro-1-methyl-1*H*-indol-3-yl)cyclohexan-1-one (78.3 mg, 0.3 mmol). The residue was purified by column chromatography on silica gel (petroleum ether/EtOAc = 5:1) to yield the desired product **3ja** as pale-yellow solid (46.2 mg, 64 % yield). mp: 245-247°C.  $R_f$  = 0.48 (petroleum ether/EtOAc = 3:1).

$^1\text{H}$  NMR (400 MHz,  $\text{CDCl}_3$ )  $\delta$  8.81 (s, 1H), 8.46-8.40 (m, 2H), 7.59 (s, 1H), 7.53-7.51 (m, 3H), 7.32-7.29 (m, 2H), 3.91 (s, 3H), 2.34-2.32 (m, 2H), 2.11-2.08 (m, 6H);  $^{13}\text{C}$  NMR (100 MHz,  $\text{CDCl}_3$ )  $\delta$  192.3, 170.9, 135.8, 134.0, 133.0, 130.8, 129.1, 128.6, 128.4, 127.6, 124.1, 123.6, 110.6, 108.3, 91.4, 40.0, 34.0, 27.5. HRMS calcd. for  $\text{C}_{22}\text{H}_{20}\text{ClN}_3$   $[\text{M}+\text{H}]^+$  362.1419; found 362.1434.

#### 4-(5-Bromo-1-methyl-1*H*-indol-3-yl)-2-phenyl-1,3-diazaspiro[4.4]nona-1,3-diene (3ka)

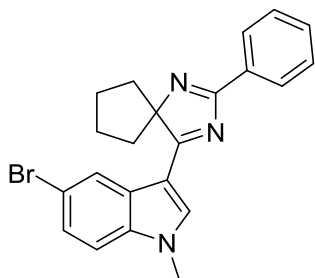

The reaction was conducted with benzamidine hydrochloride (31.3 mg, 0.2 mmol) and 2-(5-

bromo-1-methyl-1*H*-indol-3-yl)cyclohexan-1-one (91.5 mg, 0.3 mmol). The residue was purified by column chromatography on silica gel (petroleum ether/EtOAc = 5:1) to yield the desired product **3ka** as pale-yellow solid (47.8 mg, 59 % yield). mp: 263-265°C.  $R_f$  = 0.48 (petroleum ether/EtOAc = 3:1).

$^1\text{H}$  NMR (400 MHz,  $\text{CDCl}_3$ )  $\delta$  9.00 (s, 1H), 8.48-8.46 (m, 2H), 7.59 (s, 1H), 7.55-7.54 (m, 3H), 7.48 (d,  $J$  = 8.8 Hz, 1H), 7.28 (d,  $J$  = 2.0 Hz, 1H), 3.93 (s, 3H), 2.36-2.34 (m, 2H), 2.13-2.10 (m, 6H);  $^{13}\text{C}$  NMR (100 MHz,  $\text{CDCl}_3$ )  $\delta$  192.3, 170.8, 136.1, 133.8, 133.1, 130.7, 129.1, 128.6, 128.3, 126.7, 126.6, 116.1, 111.03, 108.2, 91.4, 40.0, 34.0, 27.5. HRMS calcd. for  $\text{C}_{22}\text{H}_{20}\text{BrN}_3$   $[\text{M}+\text{H}]^+$  406.0913; found 406.0925.

#### 4-(5-Methoxy-1-methyl-1*H*-indol-3-yl)-2-phenyl-1,3-diazaspiro[4.4]nona-1,3-diene (**3la**)

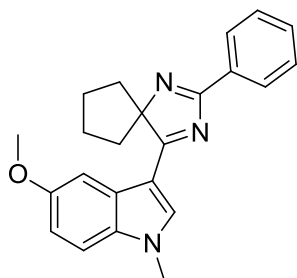

The reaction was conducted with benzamidine hydrochloride (31.3 mg, 0.2 mmol) and 2-(5-methoxy-1-methyl-1*H*-indol-3-yl)cyclohexan-1-one (77.1 mg, 0.3 mmol). The residue was purified by column chromatography on silica gel (petroleum ether/EtOAc = 2:1) to yield the desired product **3la** as pale-yellow solid (54.3 mg, 76 % yield). mp: 150-152°C.  $R_f$  = 0.41 (petroleum ether/EtOAc = 1:1).

$^1\text{H}$  NMR (400 MHz,  $\text{CDCl}_3$ )  $\delta$  8.46-8.43 (m, 2H), 8.40 (s, 1H), 7.56 (s, 1H), 7.52-7.49 (m, 3H), 7.29 (d,  $J$  = 8.8 Hz, 1H), 7.04-7.01 (m, 1H), 4.01 (s, 3H), 3.90 (s, 3H), 2.34-2.29 (m, 2H), 2.17-2.07 (m, 6H);  $^{13}\text{C}$  NMR (100 MHz,  $\text{CDCl}_3$ )  $\delta$  192.8, 170.9, 156.4, 133.3, 132.5, 130.6, 129.0, 128.5, 127.6, 113.8, 110.4, 108.2, 105.6, 91.3, 56.0, 40.2, 34.0, 27.5. HRMS calcd. for  $\text{C}_{23}\text{H}_{23}\text{N}_3\text{O}$   $[\text{M}+\text{H}]^+$  358.1914; found 358.1927.

#### Methyl 1-methyl-3-(2-phenyl-1,3-diazaspiro[4.4]nona-1,3-dien-4-yl)-1*H*-indole-5-carboxylate (**3ma**)

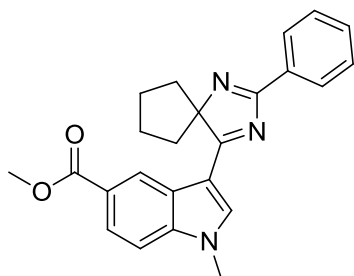

The reaction was conducted with benzamidine hydrochloride (31.3 mg, 0.2 mmol) and methyl 1-methyl-3-(2-oxocyclohexyl)-1H-indole-5-carboxylate (85.5 mg, 0.3 mmol). The residue was purified by column chromatography on silica gel (petroleum ether/EtOAc = 1:1) to yield the desired product **3ma** as pale-yellow solid (47.7 mg, 62 % yield). mp: 199-201°C.  $R_f$  = 0.31 (petroleum ether/EtOAc = 1:1).

$^1\text{H}$  NMR (400 MHz,  $\text{CDCl}_3$ )  $\delta$  9.56 (s, 1H), 8.48 (d,  $J$  = 7.6 Hz, 2H), 8.08 (d,  $J$  = 8.4 Hz, 1H), 7.65 (d,  $J$  = 2.8 Hz, 1H), 7.54-7.50 (m, 3H), 7.41 (d,  $J$  = 8.8 Hz, 1H), 4.00 (s, 3H), 3.95 (s, 3H), 2.35-2.33 (m, 2H), 2.16-2.06 (m, 6H);  $^{13}\text{C}$  NMR (100 MHz,  $\text{CDCl}_3$ )  $\delta$  192.2, 170.9, 168.1, 139.8, 134.2, 133.0, 130.7, 129.1, 128.6, 126.8, 126.4, 125.0, 124.4, 109.8, 109.4, 91.6, 52.2, 39.8, 33.9, 27.5. HRMS calcd. for  $\text{C}_{24}\text{H}_{23}\text{N}_3\text{O}_2$   $[\text{M}+\text{H}]^+$  386.1863; found 386.1870.

#### 4-(1,6-Dimethyl-1H-indol-3-yl)-2-phenyl-1,3-diazaspiro[4.4]nona-1,3-diene (**3na**)

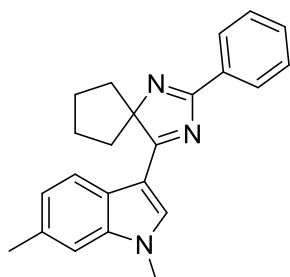

The reaction was conducted with benzamidine hydrochloride (31.3 mg, 0.2 mmol) and 2-(1,6-dimethyl-1H-indol-3-yl)cyclohexan-1-one (72.0 mg, 0.3 mmol). The residue was purified by column chromatography on silica gel (petroleum ether/EtOAc = 5:1) to yield the desired product **3na** as pale-yellow solid (49.1 mg, 72 % yield). mp: 201-203°C.  $R_f$  = 0.47 (petroleum ether/EtOAc = 3:1).

$^1\text{H}$  NMR (400 MHz,  $\text{CDCl}_3$ )  $\delta$  8.69 (d,  $J$  = 8.0 Hz, 1H), 8.47-8.44 (m, 2H), 7.53 (s, 1H), 7.52-7.49 (m, 3H), 7.23 (d,  $J$  = 8.0 Hz, 1H), 7.19 (s, 1H), 3.89 (s, 3H), 2.55 (s, 3H), 2.34-2.29 (m, 2H), 2.17-2.09 (m, 6H);  $^{13}\text{C}$  NMR (100 MHz,  $\text{CDCl}_3$ )  $\delta$  192.8, 171.0, 136.4, 133.3, 130.6, 129.1, 128.5, 128.3, 127.0, 124.1, 123.4, 122.5, 109.9, 108.8, 91.3, 48.1, 40.2, 27.7, 22.8. HRMS calcd. for  $\text{C}_{23}\text{H}_{23}\text{N}_3$   $[\text{M}+\text{H}]^+$

342.1965; found 342.1977.

**4-(6-Fluoro-1-methyl-1*H*-indol-3-yl)-2-phenyl-1,3-diazaspiro[4.4]nona-1,3-diene (3oa)**

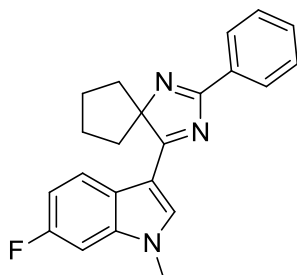

The reaction was conducted with benzamidine hydrochloride (31.3 mg, 0.2 mmol) and 2-(6-fluoro-1-methyl-1*H*-indol-3-yl)cyclohexan-1-one (73.5 mg, 0.3 mmol). The residue was purified by column chromatography on silica gel (petroleum ether/EtOAc = 5:1) to yield the desired product **3oa** as pale-yellow solid (42.1 mg, 61 % yield). mp: 199-201 °C.  $R_f$  = 0.49 (petroleum ether/EtOAc = 3:1).

$^1\text{H}$  NMR (400 MHz,  $\text{CDCl}_3$ )  $\delta$  8.80-8.77 (m, 1H), 8.45-8.43 (m, 2H), 7.57 (s, 1H), 7.51-7.50 (m, 3H), 7.15 (t,  $J$  = 9.2 Hz, 1H), 7.07 (d,  $J$  = 9.2 Hz, 1H), 3.88 (s, 3H), 2.34-2.32 (m, 2H), 2.11-2.09 (m, 6H);  $^{13}\text{C}$  NMR (100 MHz,  $\text{CDCl}_3$ )  $\delta$  192.5, 170.8, 137.6, 133.5, 133.1, 130.7, 129.1, 128.5, 125.3, 125.2, 123.2, 111.0 (d,  $J$  = 23.7 Hz), 108.8, 96.2 (d,  $J$  = 26.5 Hz), 91.5, 40.1, 33.9, 27.5.  $^{19}\text{F}$  NMR (376 MHz,  $\text{CDCl}_3$ )  $\delta$  -118.0. HRMS calcd. for  $\text{C}_{22}\text{H}_{20}\text{FN}_3$   $[\text{M}+\text{H}]^+$  346.1714; found 346.1731.

**4-(6-Chloro-1-methyl-1*H*-indol-3-yl)-2-phenyl-1,3-diazaspiro[4.4]nona-1,3-diene (3pa)**

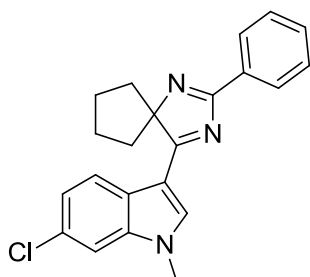

The reaction was conducted with benzamidine hydrochloride (31.3 mg, 0.2 mmol) and 2-(6-chloro-1-methyl-1*H*-indol-3-yl)cyclohexan-1-one (78.3 mg, 0.3 mmol). The residue was purified by column chromatography on silica gel (petroleum ether/EtOAc = 5:1) to yield the desired product **3pa** as pale-yellow solid (46.9 mg, 65 % yield). mp: 227-229 °C.  $R_f$  = 0.49 (petroleum ether/EtOAc = 3:1).

$^1\text{H}$  NMR (400 MHz,  $\text{CDCl}_3$ )  $\delta$  8.75 (d,  $J$  = 8.4 Hz, 1H), 8.45-8.42 (m, 2H), 7.57 (s, 1H), 7.52-7.50 (m,

3H), 7.38 (s, 1H), 7.35 (d,  $J = 8.8$  Hz, 1H), 3.89 (s, 3H), 2.34-2.32 (m, 2H), 2.11-2.08 (m, 6H);  $^{13}\text{C}$  NMR (100 MHz,  $\text{CDCl}_3$ )  $\delta$  192.4, 170.8, 137.8, 133.6, 133.1, 130.7, 129.7, 129.1, 128.5, 125.3, 125.1, 123.1, 109.7, 108.8, 91.5, 40.0, 33.9, 27.5. HRMS calcd. for  $\text{C}_{22}\text{H}_{20}\text{ClN}_3$   $[\text{M}+\text{H}]^+$  362.1419; found 362.1437.

#### 4-(1,7-Dimethyl-1*H*-indol-3-yl)-2-phenyl-1,3-diazaspiro[4.4]nona-1,3-diene (3qa)

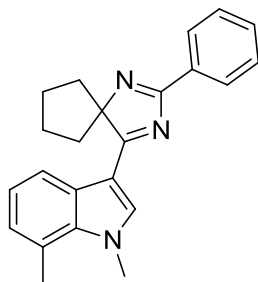

The reaction was conducted with benzamidine hydrochloride (31.3 mg, 0.2 mmol) and 2-(1,7-dimethyl-1*H*-indol-3-yl)cyclohexan-1-one (72.0 mg, 0.3 mmol). The residue was purified by column chromatography on silica gel (petroleum ether/EtOAc = 5:1) to yield the desired product **3qa** as pale-yellow solid (47.7 mg, 70 % yield). mp: 288-290°C.  $R_f = 0.46$  (petroleum ether/EtOAc = 3:1).

$^1\text{H}$  NMR (400 MHz,  $\text{CDCl}_3$ )  $\delta$  8.76 (d,  $J = 8.0$  Hz, 1H), 8.47-8.45 (m, 2H), 7.53-7.49 (m, 4H), 7.26 (t,  $J = 7.6$  Hz, 1H), 7.07 (d,  $J = 7.2$  Hz, 1H), 4.18 (s, 3H), 2.81 (s, 3H), 2.34-2.91 (m, 2H), 2.17-2.07 (m, 6H);  $^{13}\text{C}$  NMR (100 MHz,  $\text{CDCl}_3$ )  $\delta$  192.5, 170.9, 136.1, 134.9, 133.3, 130.6, 129.1, 128.4, 127.9, 126.5, 122.7, 122.1, 121.4, 108.1, 91.5, 40.2, 38.0, 27.5, 19.8. HRMS calcd. for  $\text{C}_{23}\text{H}_{23}\text{N}_3$   $[\text{M}+\text{H}]^+$  342.1965; found 342.1981.

#### 4-(7-Bromo-1-methyl-1*H*-indol-3-yl)-2-phenyl-1,3-diazaspiro[4.4]nona-1,3-diene (3ra)

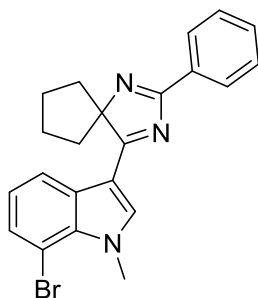

The reaction was conducted with benzamidine hydrochloride (31.3 mg, 0.2 mmol) and 2-(7-bromo-1-methyl-1*H*-indol-3-yl)cyclohexan-1-one (91.5 mg, 0.3 mmol). The residue was purified

by column chromatography on silica gel (petroleum ether/EtOAc = 5:1) to yield the desired product **3ra** as pale-yellow solid (47.9 mg, 59 % yield). mp: 266-268°C.  $R_f$  = 0.48 (petroleum ether/EtOAc = 3:1).

$^1\text{H}$  NMR (400 MHz,  $\text{CDCl}_3$ )  $\delta$  8.89 (d,  $J$  = 8.0 Hz, 1H), 8.45-8.42 (m, 2H), 7.53 (s, 1H), 7.52-7.49 (m, 4H), 7.20 (t,  $J$  = 7.8 Hz, 1H), 4.30 (s, 3H), 2.34-2.29 (m, 2H), 2.11-2.08 (m, 6H);  $^{13}\text{C}$  NMR (100 MHz,  $\text{CDCl}_3$ )  $\delta$  192.4, 170.8, 137.8, 133.6, 133.1, 130.7, 129.7, 129.1, 128.5, 125.3, 125.1, 123.1, 109.7, 108.8, 91.5, 40.0, 33.9, 27.5. HRMS calcd. for  $\text{C}_{22}\text{H}_{20}\text{BrN}_3$   $[\text{M}+\text{H}]^+$  406.0913; found 406.0929.

### 6-Methyl-4-(1-methyl-1H-indol-3-yl)-2-phenyl-1,3-diazaspiro[4.4]nona-1,3-diene (3sa)

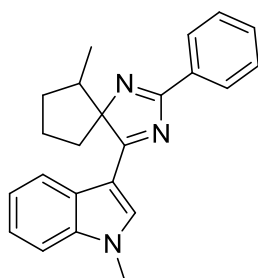

The reaction was conducted with benzamidine hydrochloride (31.3 mg, 0.2 mmol) and 2-methyl-6-(1-methyl-1H-indol-3-yl)cyclohexan-1-one (72.0 mg, 0.3 mmol). The residue was purified by column chromatography on silica gel (petroleum ether/EtOAc = 5:1) to yield the desired product **3sa** as pale-yellow solid (26.6 mg, 39 % yield). mp: 168-170°C.  $R_f$  = 0.45 (petroleum ether/EtOAc = 3:1).

$^1\text{H}$  NMR (400 MHz,  $\text{CDCl}_3$ )  $\delta$  8.87 (d,  $J$  = 8.4 Hz, 1H), 8.47 (d,  $J$  = 7.6 Hz, 2H), 7.70 (s, 1H), 7.52-7.50 (m, 3H), 7.41-7.40 (m, 3H), 3.93 (s, 3H), 2.57-2.51 (m, 1H), 2.35-2.31 (m, 2H), 2.25-2.08 (m, 4H), 0.64 (d,  $J$  = 64 Hz, 3H);  $^{13}\text{C}$  NMR (100 MHz,  $\text{CDCl}_3$ )  $\delta$  191.8, 171.5, 137.3, 133.1, 130.6, 129.2, 128.5, 126.9, 126.6, 124.2, 123.7, 122.5, 109.5, 108.9, 50.6, 38.6, 34.9, 33.8, 29.8, 24.7, 12.8. HRMS calcd. for  $\text{C}_{23}\text{H}_{23}\text{N}_3$   $[\text{M}+\text{H}]^+$  342.1965; found 342.1972

## 6. References

[1] Tang, Q.; Chen, X.; Tiwari, B.; Chi, Y. R.; Org. Lett. 2012, 14 (7), 1922-1925.

## 7. Crystal data and structure refinement for **3aa**

The product **3aa** (20.0 mg) were complete dissolved in DCM (0.5 mL) in a test tube. Then *n*-hexane (2.0 mL) were added dropwise, slow volatilized at room temperature. A few days later, the crystal was grown at room temperature.

A suitable crystal was collected, on a SuperNova, Dual, Cu at zero, AtlasS2 diffractometer. The data were collected and processed using CrysAlisPro. The structures were solved by direct methods using Olex2 software. The crystal was kept at 150.0(10) K during data collection.

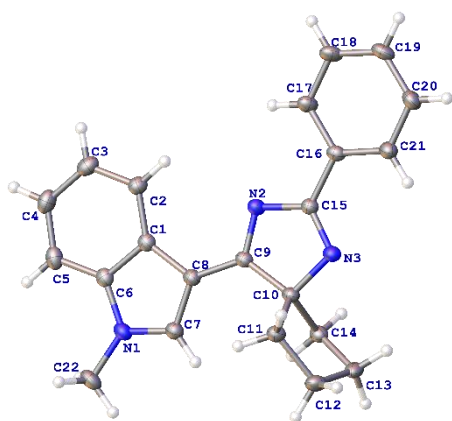

CCDC number: 2133077

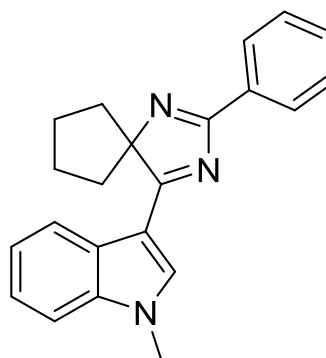

**3aa**

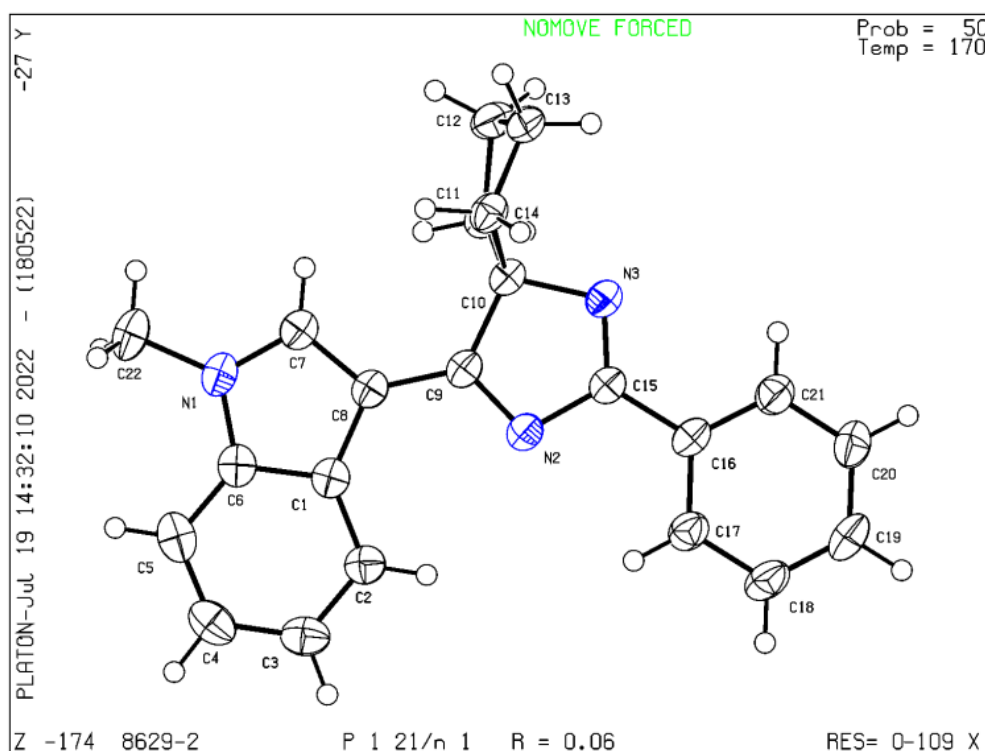

Figure S1. Ellipsoid plot of **3aa** ( shown at 50% probability levels)

Table 1. Crystal data and structure refinement for **3aa**.

|                                             |                                                                |
|---------------------------------------------|----------------------------------------------------------------|
| Identification code                         | <b>3aa</b>                                                     |
| Empirical formula                           | C <sub>22</sub> H <sub>21</sub> N <sub>3</sub>                 |
| Formula weight                              | 327.42                                                         |
| Temperature/K                               | 169.99(10)                                                     |
| Crystal system                              | monoclinic                                                     |
| Space group                                 | P2 <sub>1</sub> /n                                             |
| a/Å                                         | 8.0170(4)                                                      |
| b/Å                                         | 11.8451(7)                                                     |
| c/Å                                         | 18.3346(12)                                                    |
| $\alpha$ /°                                 | 90                                                             |
| $\beta$ /°                                  | 99.131(5)                                                      |
| $\gamma$ /°                                 | 90                                                             |
| Volume/Å <sup>3</sup>                       | 1719.03(18)                                                    |
| Z                                           | 4                                                              |
| $\rho_{\text{calc}}/\text{cm}^3$            | 1.265                                                          |
| $\mu/\text{mm}^{-1}$                        | 0.584                                                          |
| F(000)                                      | 696.0                                                          |
| Crystal size/mm <sup>3</sup>                | 0.12 × 0.1 × 0.08                                              |
| Radiation                                   | Cu K $\alpha$ ( $\lambda$ = 1.54184)                           |
| 2 $\Theta$ range for data collection/°      | 8.922 to 147.43                                                |
| Index ranges                                | -6 ≤ h ≤ 9, -14 ≤ k ≤ 14, -21 ≤ l ≤ 22                         |
| Reflections collected                       | 6433                                                           |
| Independent reflections                     | 3356 [ $R_{\text{int}}$ = 0.0524, $R_{\text{sigma}}$ = 0.0630] |
| Data/restraints/parameters                  | 3356/0/227                                                     |
| Goodness-of-fit on F <sup>2</sup>           | 1.075                                                          |
| Final R indexes [ $I \geq 2\sigma(I)$ ]     | $R_1$ = 0.0647, $wR_2$ = 0.1722                                |
| Final R indexes [all data]                  | $R_1$ = 0.0768, $wR_2$ = 0.1881                                |
| Largest diff. peak/hole / e Å <sup>-3</sup> | 0.33/-0.27                                                     |

Table 2. Fractional Atomic Coordinates ( $\times 10^4$ ) and Equivalent Isotropic Displacement Parameters ( $\text{\AA}^2 \times 10^3$ ) for **3aa**.  $U_{\text{eq}}$  is defined as 1/3 of the trace of the orthogonalised  $U_{ij}$  tensor.

| Atom | <i>x</i>   | <i>y</i>   | <i>z</i>   | $U(\text{eq})$ |
|------|------------|------------|------------|----------------|
| N1   | 11940(2)   | 4350.9(15) | 5870.1(10) | 35.1(4)        |
| N2   | 6858.6(19) | 2597.5(14) | 6057.5(9)  | 31.1(4)        |
| N3   | 6280.9(19) | 2765.0(14) | 7247.2(9)  | 31.4(4)        |
| C1   | 9758(2)    | 3280.2(16) | 5321.5(11) | 31.0(4)        |
| C2   | 8856(3)    | 2664.9(17) | 4740.9(11) | 33.9(5)        |
| C3   | 9481(3)    | 2617.8(18) | 4077.0(12) | 41.2(5)        |
| C4   | 10976(3)   | 3172(2)    | 3982.4(12) | 44.3(5)        |
| C5   | 11901(3)   | 3773.0(19) | 4551.1(13) | 40.5(5)        |
| C6   | 11271(2)   | 3817.2(16) | 5218.1(11) | 32.5(4)        |
| C7   | 10896(2)   | 4167.5(17) | 6373.1(11) | 33.3(4)        |
| C8   | 9525(2)    | 3521.9(16) | 6072.8(10) | 29.9(4)        |
| C9   | 8127(2)    | 3160.1(16) | 6419.4(10) | 28.4(4)        |
| C10  | 7898(2)    | 3337.3(17) | 7213.4(10) | 29.9(4)        |
| C11  | 9313(2)    | 2843.1(17) | 7804.0(11) | 33.9(5)        |
| C12  | 9338(3)    | 3584(2)    | 8497.0(11) | 42.3(5)        |
| C13  | 7893(3)    | 4429.8(19) | 8308.1(11) | 38.5(5)        |
| C14  | 7741(2)    | 4570.2(17) | 7474.4(11) | 34.1(5)        |
| C15  | 5796(2)    | 2379.0(16) | 6588.8(10) | 29.0(4)        |
| C16  | 4238(2)    | 1725.6(16) | 6366.0(10) | 30.8(4)        |
| C17  | 3861(3)    | 1295.8(18) | 5647.6(11) | 37.3(5)        |
| C18  | 2435(3)    | 639(2)     | 5444.3(12) | 43.6(5)        |
| C19  | 1367(3)    | 413.4(19)  | 5947.8(13) | 42.9(5)        |
| C20  | 1721(3)    | 841(2)     | 6655.6(13) | 43.1(5)        |
| C21  | 3150(2)    | 1482.8(19) | 6869.1(12) | 37.8(5)        |
| C22  | 13510(2)   | 4985(2)    | 5987.6(14) | 45.4(6)        |

Table 3. Anisotropic Displacement Parameters ( $\text{\AA}^2 \times 10^3$ ) for **3aa** The Anisotropic displacement factor exponent takes the form:  $-2\pi^2[h^2a^{*2}U_{11}+2hka^*b^*U_{12}+\dots]$ .

| Atom | $U_{11}$ | $U_{22}$ | $U_{33}$ | $U_{23}$ | $U_{13}$ | $U_{12}$ |
|------|----------|----------|----------|----------|----------|----------|
| N1   | 27.5(8)  | 30.8(9)  | 46.6(10) | -0.1(7)  | 4.6(7)   | -2.1(7)  |
| N2   | 30.0(8)  | 30.2(9)  | 32.2(8)  | 1.0(7)   | 1.7(6)   | -2.2(7)  |
| N3   | 30.5(8)  | 27.8(9)  | 35.1(8)  | -2.1(7)  | 2.9(6)   | -2.7(7)  |
| C1   | 32.1(9)  | 24.4(9)  | 36.2(10) | 3.1(8)   | 4.4(7)   | 3.9(8)   |
| C2   | 39.5(10) | 26.8(10) | 34.7(10) | 1.2(8)   | 4.1(8)   | 1.2(8)   |
| C3   | 55.8(12) | 30.4(11) | 36.3(10) | -1.6(9)  | 4.0(9)   | 6.3(9)   |
| C4   | 56.7(13) | 39.5(12) | 39.6(11) | 6.2(10)  | 16.4(10) | 11.5(10) |
| C5   | 38.7(10) | 34.1(11) | 51.7(13) | 10.3(9)  | 16.3(9)  | 8.5(9)   |
| C6   | 32.2(9)  | 24.3(9)  | 41.1(10) | 4.4(8)   | 6.4(8)   | 5.5(8)   |
| C7   | 30.9(9)  | 30.4(10) | 37.6(10) | 0.3(8)   | 2.7(7)   | 0.8(8)   |
| C8   | 29.3(8)  | 24.5(9)  | 35.3(10) | 0.6(8)   | 3.4(7)   | 1.0(7)   |
| C9   | 27.8(9)  | 22.5(9)  | 33.9(9)  | 1.4(7)   | 1.2(7)   | 0.5(7)   |
| C10  | 27.2(9)  | 27.7(10) | 33.4(9)  | -1.8(8)  | 0.9(7)   | -1.9(7)  |
| C11  | 33.1(9)  | 32.0(10) | 35.0(10) | 0.1(8)   | 0.3(8)   | -1.6(8)  |
| C12  | 43.4(11) | 45.8(13) | 35.0(10) | -4.4(9)  | -2.3(8)  | -9.0(10) |
| C13  | 40.6(10) | 35.8(11) | 39.8(11) | -11.6(9) | 8.4(8)   | -11.9(9) |
| C14  | 32.0(9)  | 27.2(10) | 42.4(11) | -4.2(8)  | 4.1(8)   | -1.8(8)  |
| C15  | 28.8(9)  | 24.8(9)  | 32.3(9)  | 1.0(7)   | 1.5(7)   | 0.9(7)   |
| C16  | 28.0(9)  | 24.6(9)  | 37.2(10) | 0.7(8)   | -3.2(7)  | 1.0(7)   |
| C17  | 35.5(10) | 39.7(11) | 33.9(10) | 3.4(9)   | -2.8(8)  | -4.3(9)  |
| C18  | 39.9(11) | 46.7(13) | 38.9(11) | 0.9(10)  | -9.9(9)  | -7.2(10) |
| C19  | 29.9(10) | 38.1(12) | 56.0(13) | 1.7(10)  | -8.0(9)  | -7.1(8)  |
| C20  | 30.4(10) | 44.5(13) | 54.8(13) | -1.4(10) | 8.0(9)   | -4.8(9)  |
| C21  | 33.3(10) | 36.7(11) | 43.3(11) | -6.7(9)  | 5.7(8)   | -2.2(8)  |
| C22  | 26.5(9)  | 43.1(13) | 65.1(15) | 2.6(11)  | 3.1(9)   | -3.8(9)  |

Table 4. Bond Lengths for **3aa**

| Atom | Atom | Length/Å | Atom | Atom | Length/Å |
|------|------|----------|------|------|----------|
| N1   | C6   | 1.383(3) | C8   | C9   | 1.438(3) |
| N1   | C7   | 1.358(3) | C9   | C10  | 1.511(3) |
| N1   | C22  | 1.452(3) | C10  | C11  | 1.553(3) |
| N2   | C9   | 1.306(2) | C10  | C14  | 1.548(3) |
| N2   | C15  | 1.416(2) | C11  | C12  | 1.542(3) |
| N3   | C10  | 1.473(2) | C12  | C13  | 1.529(3) |
| N3   | C15  | 1.292(2) | C13  | C14  | 1.523(3) |
| C1   | C2   | 1.394(3) | C15  | C16  | 1.471(3) |
| C1   | C6   | 1.409(3) | C16  | C17  | 1.400(3) |
| C1   | C8   | 1.448(3) | C16  | C21  | 1.396(3) |
| C2   | C3   | 1.389(3) | C17  | C18  | 1.384(3) |
| C3   | C4   | 1.401(3) | C18  | C19  | 1.381(3) |
| C4   | C5   | 1.378(3) | C19  | C20  | 1.380(3) |
| C5   | C6   | 1.396(3) | C20  | C21  | 1.379(3) |
| C7   | C8   | 1.380(3) |      |      |          |

Table 5. Bond Angles for **3aa**

| Atom | Atom | Atom | Angle/°    | Atom | Atom | Atom | Angle/°    |
|------|------|------|------------|------|------|------|------------|
| C6   | N1   | C22  | 124.94(18) | N3   | C10  | C9   | 102.68(14) |
| C7   | N1   | C6   | 108.53(16) | N3   | C10  | C11  | 110.33(15) |
| C7   | N1   | C22  | 126.53(19) | N3   | C10  | C14  | 107.83(15) |
| C9   | N2   | C15  | 104.42(16) | C9   | C10  | C11  | 115.60(16) |
| C15  | N3   | C10  | 105.08(15) | C9   | C10  | C14  | 117.21(16) |
| C2   | C1   | C6   | 119.13(18) | C14  | C10  | C11  | 103.06(15) |
| C2   | C1   | C8   | 134.44(18) | C12  | C11  | C10  | 105.82(16) |
| C6   | C1   | C8   | 106.43(17) | C13  | C12  | C11  | 106.00(16) |
| C3   | C2   | C1   | 118.34(19) | C14  | C13  | C12  | 103.63(17) |
| C2   | C3   | C4   | 121.6(2)   | C13  | C14  | C10  | 102.11(16) |
| C5   | C4   | C3   | 121.1(2)   | N2   | C15  | C16  | 118.83(16) |
| C4   | C5   | C6   | 117.1(2)   | N3   | C15  | N2   | 116.95(16) |
| N1   | C6   | C1   | 108.31(17) | N3   | C15  | C16  | 124.22(17) |
| N1   | C6   | C5   | 129.02(19) | C17  | C16  | C15  | 119.98(18) |
| C5   | C6   | C1   | 122.67(19) | C21  | C16  | C15  | 121.11(18) |
| N1   | C7   | C8   | 110.82(18) | C21  | C16  | C17  | 118.86(18) |
| C7   | C8   | C1   | 105.91(17) | C18  | C17  | C16  | 120.2(2)   |
| C7   | C8   | C9   | 128.01(18) | C19  | C18  | C17  | 120.1(2)   |
| C9   | C8   | C1   | 126.08(17) | C20  | C19  | C18  | 120.09(19) |
| N2   | C9   | C8   | 121.74(17) | C21  | C20  | C19  | 120.4(2)   |
| N2   | C9   | C10  | 110.87(16) | C20  | C21  | C16  | 120.3(2)   |
| C8   | C9   | C10  | 127.38(16) |      |      |      |            |

Table 6. Torsion Angles for **3aa**

| A  | B   | C   | D   | Angle/°     | A   | B   | C   | D   | Angle/°     |
|----|-----|-----|-----|-------------|-----|-----|-----|-----|-------------|
| N1 | C7  | C8  | C1  | 0.6(2)      | C8  | C1  | C6  | C5  | -179.65(18) |
| N1 | C7  | C8  | C9  | -178.93(18) | C8  | C9  | C10 | N3  | -178.53(17) |
| N2 | C9  | C10 | N3  | 0.7(2)      | C8  | C9  | C10 | C11 | -58.4(3)    |
| N2 | C9  | C10 | C11 | 120.83(18)  | C8  | C9  | C10 | C14 | 63.5(2)     |
| N2 | C9  | C10 | C14 | -117.28(18) | C9  | N2  | C15 | N3  | 0.7(2)      |
| N2 | C15 | C16 | C17 | 2.4(3)      | C9  | N2  | C15 | C16 | -178.66(16) |
| N2 | C15 | C16 | C21 | 179.72(17)  | C9  | C10 | C11 | C12 | 152.22(17)  |
| N3 | C10 | C11 | C12 | -91.87(18)  | C9  | C10 | C14 | C13 | -168.95(16) |
| N3 | C10 | C14 | C13 | 75.93(18)   | C10 | N3  | C15 | N2  | -0.2(2)     |
| N3 | C15 | C16 | C17 | -176.87(18) | C10 | N3  | C15 | C16 | 179.04(17)  |
| N3 | C15 | C16 | C21 | 0.5(3)      | C10 | C11 | C12 | C13 | 3.2(2)      |
| C1 | C2  | C3  | C4  | -0.2(3)     | C11 | C10 | C14 | C13 | -40.77(18)  |
| C1 | C8  | C9  | N2  | -3.1(3)     | C11 | C12 | C13 | C14 | -28.8(2)    |
| C1 | C8  | C9  | C10 | 176.01(18)  | C12 | C13 | C14 | C10 | 43.19(19)   |
| C2 | C1  | C6  | N1  | -178.96(17) | C14 | C10 | C11 | C12 | 23.0(2)     |
| C2 | C1  | C6  | C5  | 0.9(3)      | C15 | N2  | C9  | C8  | 178.47(16)  |
| C2 | C1  | C8  | C7  | 178.7(2)    | C15 | N2  | C9  | C10 | -0.8(2)     |
| C2 | C1  | C8  | C9  | -1.8(4)     | C15 | N3  | C10 | C9  | -0.23(19)   |
| C2 | C3  | C4  | C5  | 1.1(3)      | C15 | N3  | C10 | C11 | -123.98(17) |
| C3 | C4  | C5  | C6  | -0.9(3)     | C15 | N3  | C10 | C14 | 124.15(17)  |
| C4 | C5  | C6  | N1  | 179.77(19)  | C15 | C16 | C17 | C18 | 177.17(19)  |
| C4 | C5  | C6  | C1  | -0.1(3)     | C15 | C16 | C21 | C20 | -178.09(19) |
| C6 | N1  | C7  | C8  | -0.3(2)     | C16 | C17 | C18 | C19 | 0.6(3)      |
| C6 | C1  | C2  | C3  | -0.7(3)     | C17 | C16 | C21 | C20 | -0.7(3)     |
| C6 | C1  | C8  | C7  | -0.6(2)     | C17 | C18 | C19 | C20 | -0.1(4)     |
| C6 | C1  | C8  | C9  | 178.87(18)  | C18 | C19 | C20 | C21 | -0.8(4)     |
| C7 | N1  | C6  | C1  | -0.2(2)     | C19 | C20 | C21 | C16 | 1.3(3)      |
| C7 | N1  | C6  | C5  | 180.0(2)    | C21 | C16 | C17 | C18 | -0.2(3)     |
| C7 | C8  | C9  | N2  | 176.30(19)  | C22 | N1  | C6  | C1  | 179.12(18)  |
| C7 | C8  | C9  | C10 | -4.6(3)     | C22 | N1  | C6  | C5  | -0.7(3)     |
| C8 | C1  | C2  | C3  | 180.0(2)    | C22 | N1  | C7  | C8  | -179.53(19) |
| C8 | C1  | C6  | N1  | 0.5(2)      |     |     |     |     |             |

Table 7. Hydrogen Atom Coordinates ( $\text{\AA}\times 10^4$ ) and Isotropic Displacement Parameters ( $\text{\AA}^2\times 10^3$ )  
for **3aa**

| Atom | <i>x</i> | <i>y</i> | <i>z</i> | U(eq) |
|------|----------|----------|----------|-------|
| H2   | 7860.87  | 2295.26  | 4796.66  | 41    |
| H3   | 8893.1   | 2208.26  | 3685.75  | 49    |
| H4   | 11349.98 | 3133.89  | 3528.17  | 53    |
| H5   | 12902.18 | 4133.57  | 4493.23  | 49    |
| H7   | 11080.39 | 4440.04  | 6854.92  | 40    |
| H11A | 9068.42  | 2063.97  | 7911.23  | 41    |
| H11B | 10395.05 | 2873.38  | 7631.8   | 41    |
| H12A | 9170.17  | 3125.65  | 8917.56  | 51    |
| H12B | 10410.54 | 3975.25  | 8614.75  | 51    |
| H13A | 6852.99  | 4136.6   | 8442.35  | 46    |
| H13B | 8161.48  | 5142.57  | 8559.89  | 46    |
| H14A | 8642.65  | 5038.62  | 7345.05  | 41    |
| H14B | 6660.52  | 4895.82  | 7265.3   | 41    |
| H17  | 4570.95  | 1452.17  | 5305.66  | 45    |
| H18  | 2195.64  | 348.52   | 4967.88  | 52    |
| H19  | 409.03   | -27.05   | 5809.72  | 52    |
| H20  | 990.27   | 695.01   | 6990.93  | 52    |
| H21  | 3390.37  | 1755.14  | 7350.05  | 45    |
| H22A | 13671.76 | 5313.6   | 6472.36  | 68    |
| H22B | 13461.84 | 5572.65  | 5624.21  | 68    |
| H22C | 14435.31 | 4488.18  | 5943.93  | 68    |

## 8. Copies of $^1\text{H}$ , $^{13}\text{C}$ and $^{19}\text{F}$ NMR spectra of all products

$^1\text{H}$  NMR (400 MHz) and  $^{13}\text{C}$  NMR (100 MHz) spectra of **3aa** ( $\text{CDCl}_3$ )

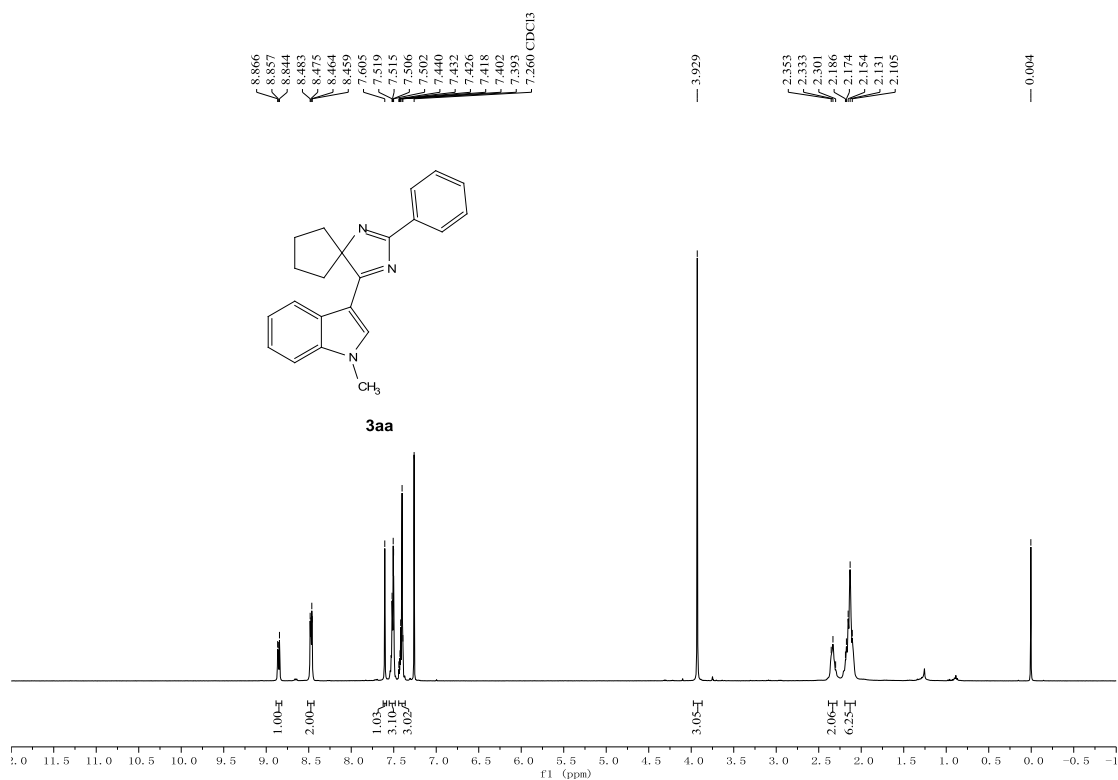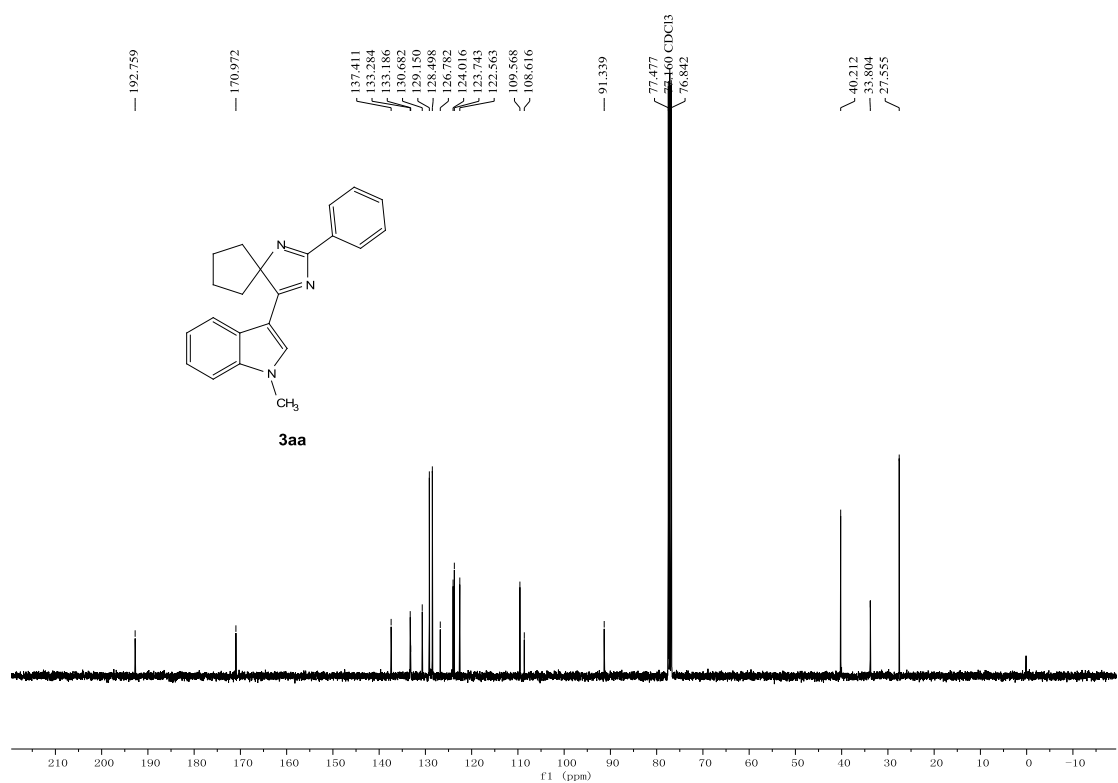

# DPET spectra of **3aa** (CDCl<sub>3</sub>)

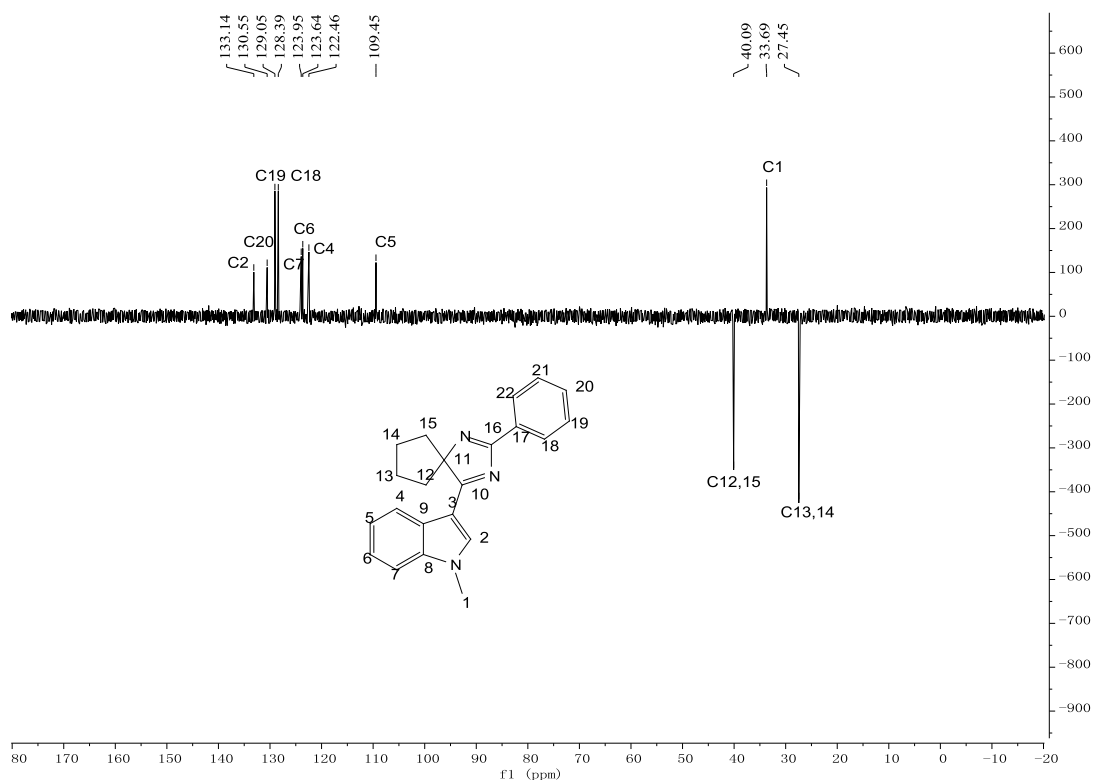

# H-H COSY of **3aa** (CDCl<sub>3</sub>)

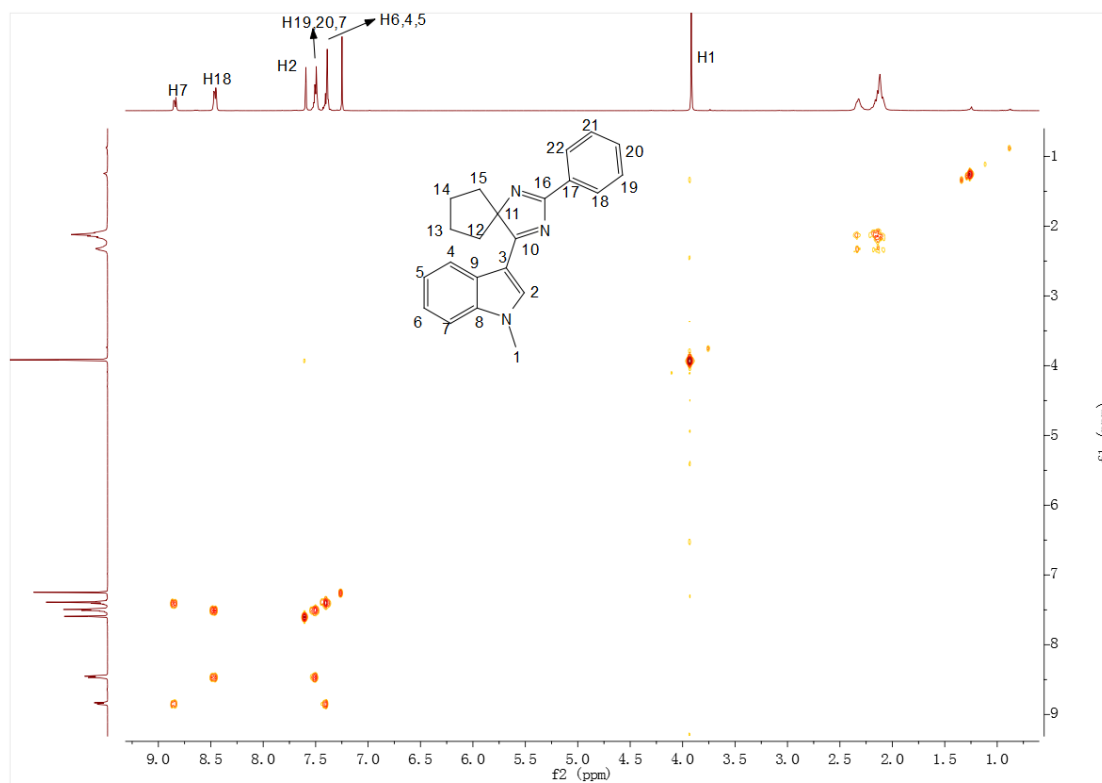

### HMBC of **3aa** (CDCl<sub>3</sub>)

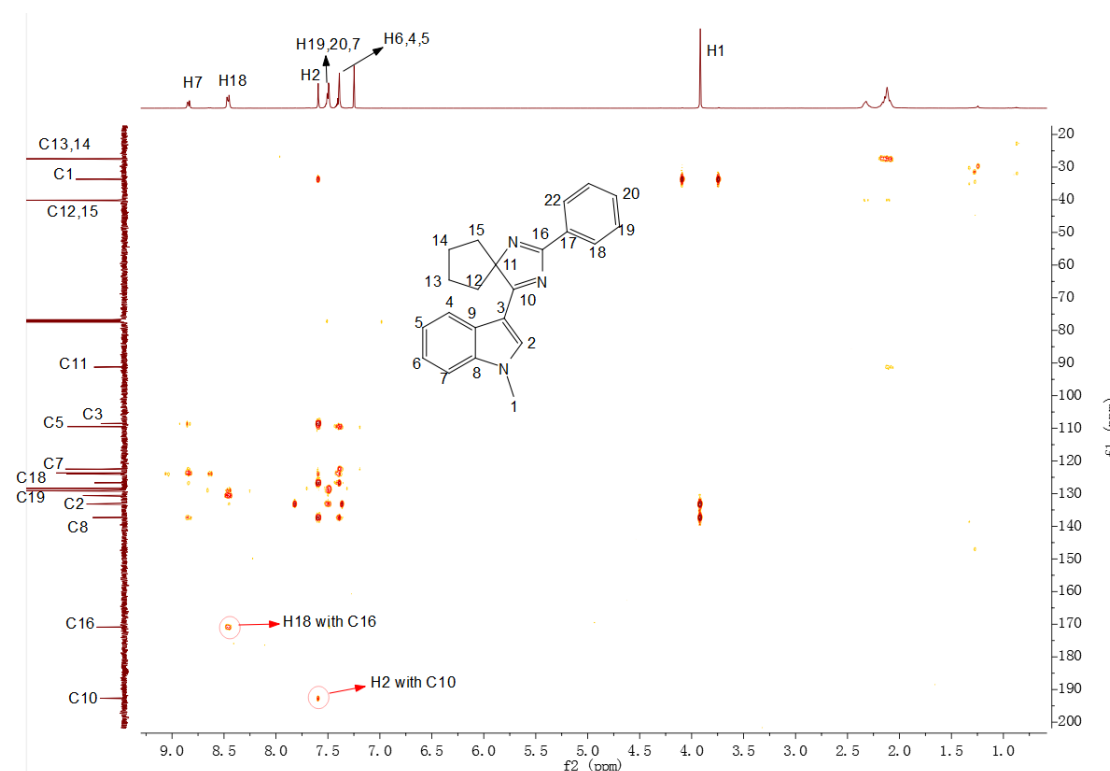

### HSQC of **3aa** (CDCl<sub>3</sub>)

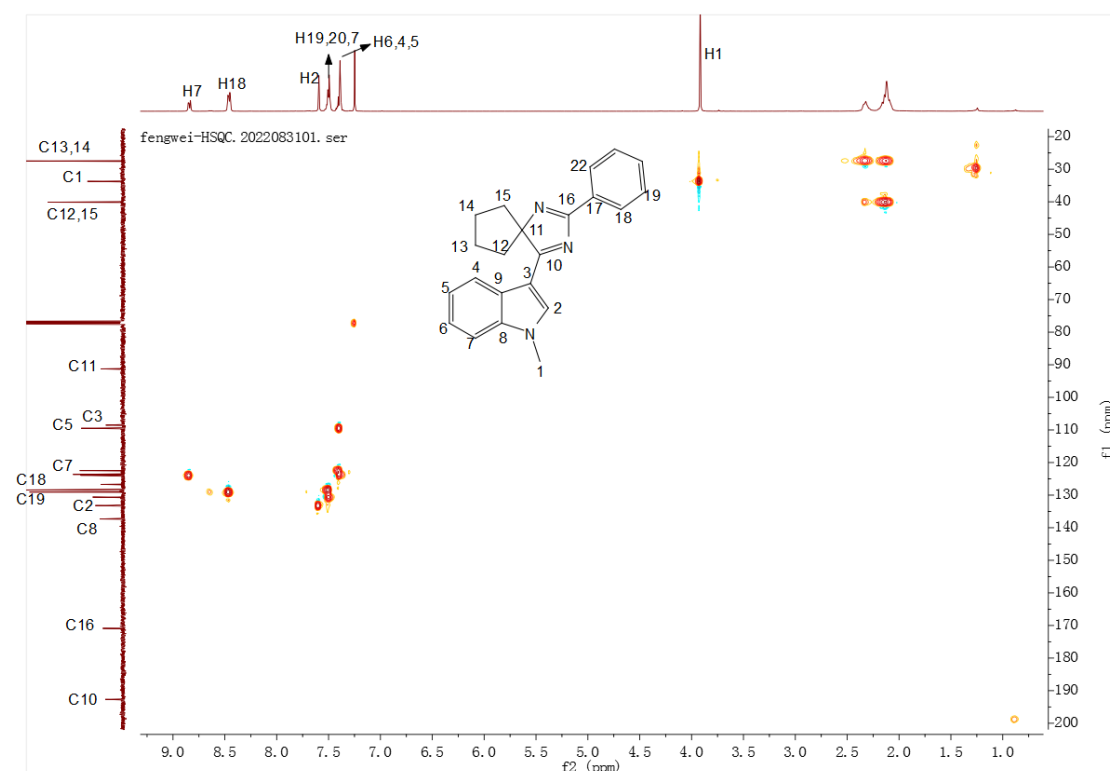

$^1\text{H}$  NMR (400 MHz) and  $^{13}\text{C}$  NMR (100 MHz) spectra of **3ab** ( $\text{CDCl}_3$ )

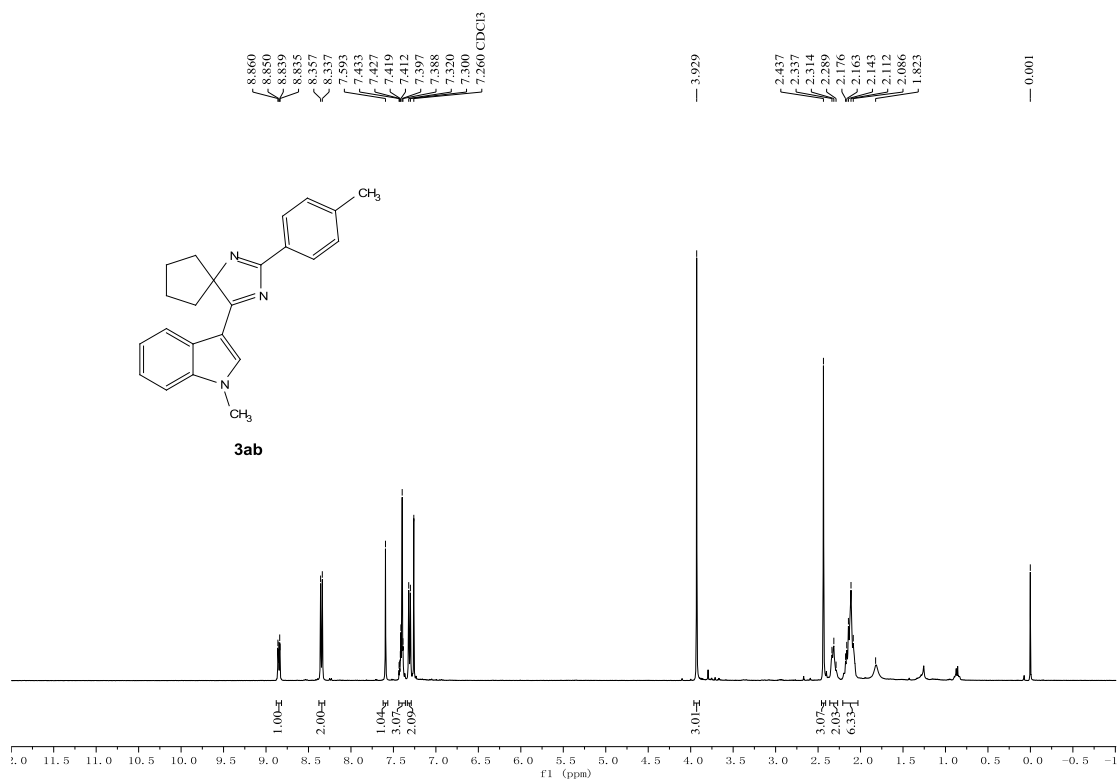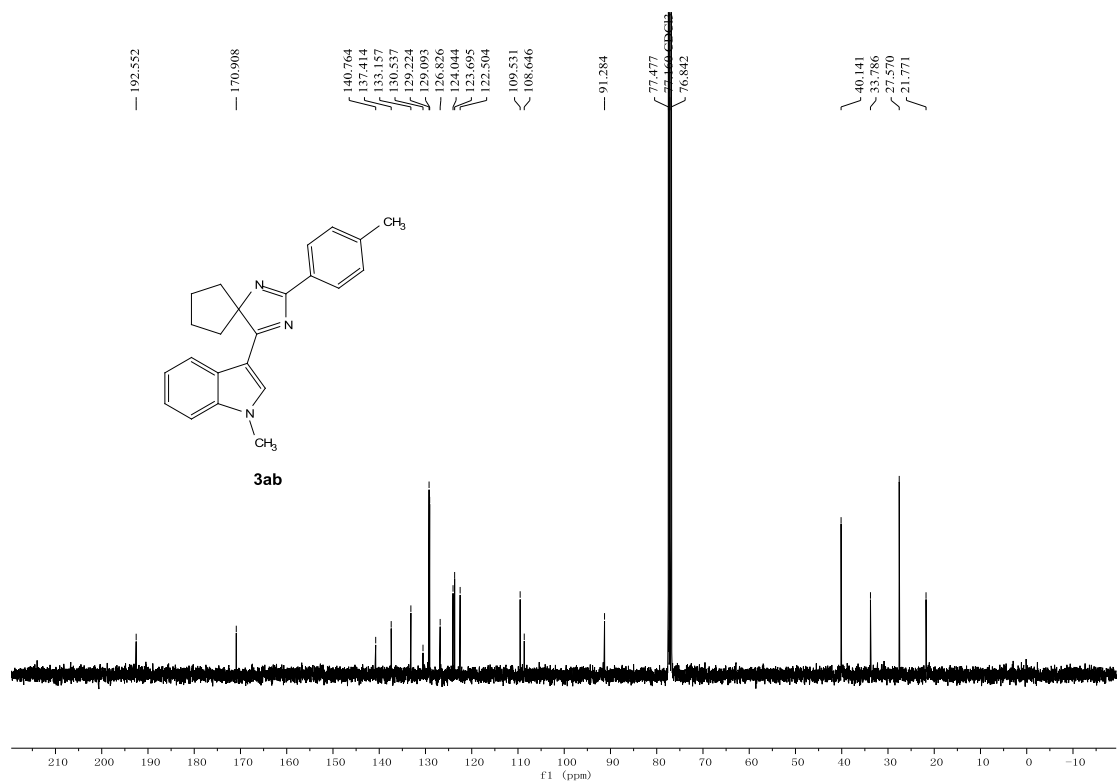

$^1\text{H}$  NMR (400 MHz) and  $^{13}\text{C}$  NMR (100 MHz) spectra of **3ac** ( $\text{CDCl}_3$ )

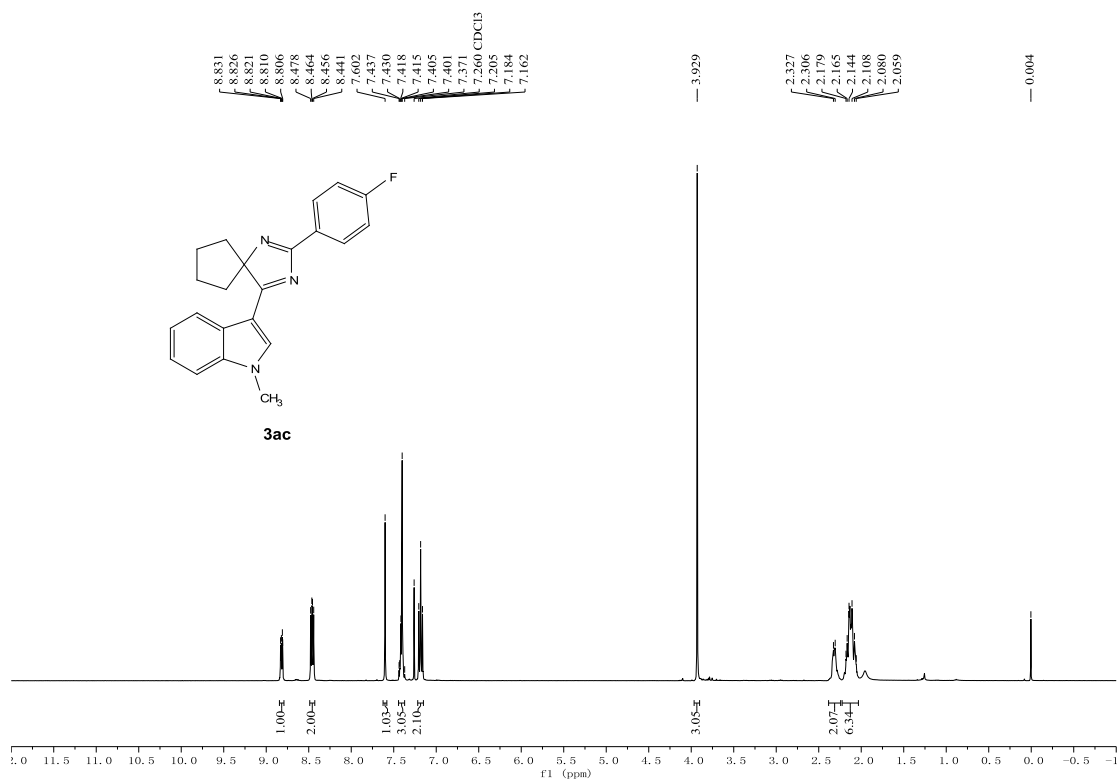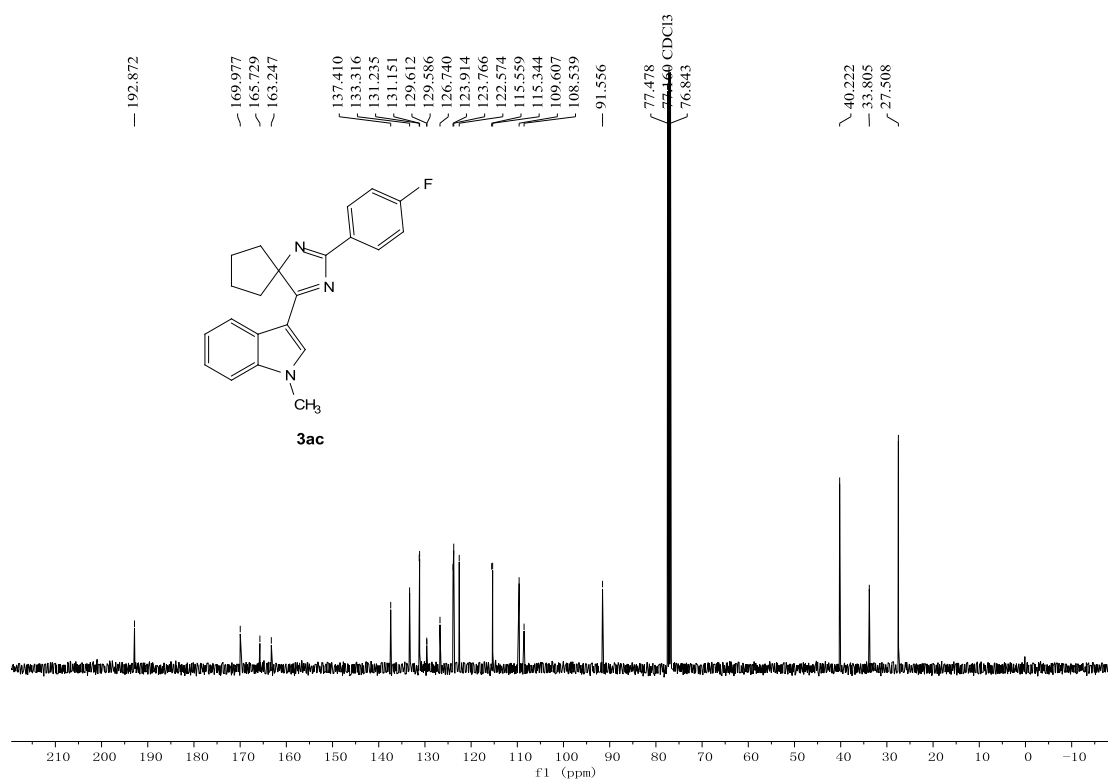

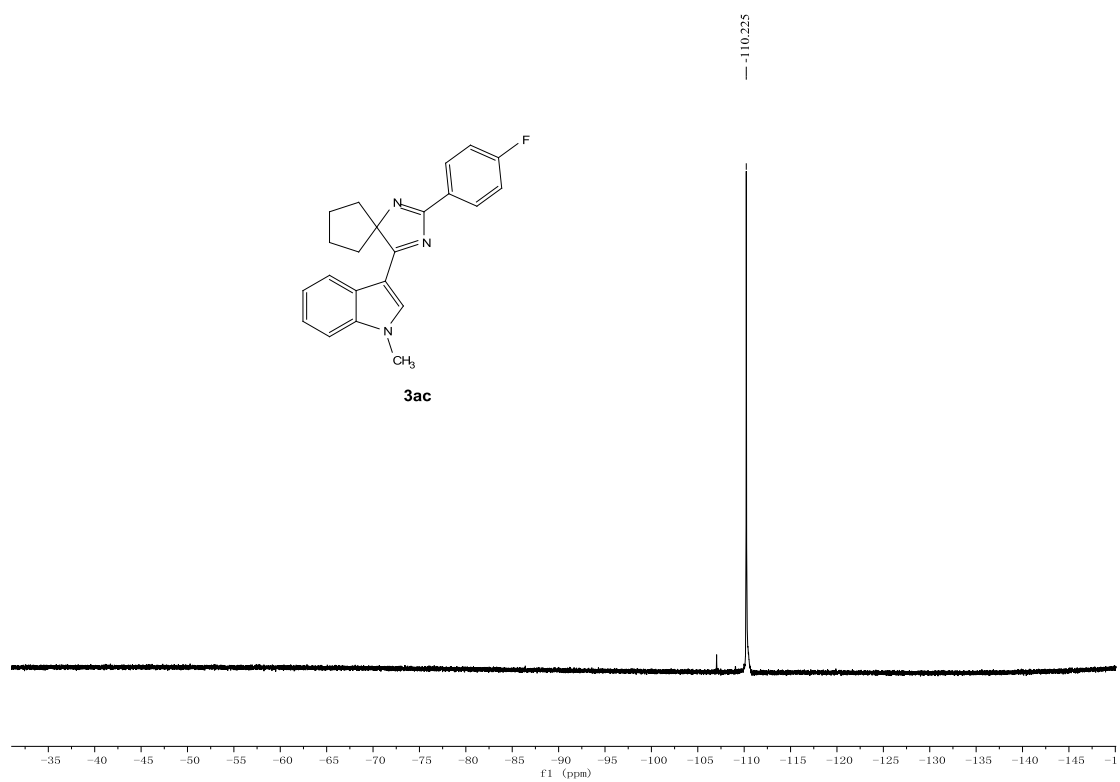

**$^1\text{H}$  NMR (400 MHz) and  $^{13}\text{C}$  NMR (100 MHz) spectra of **3ad** ( $\text{CDCl}_3$ )**

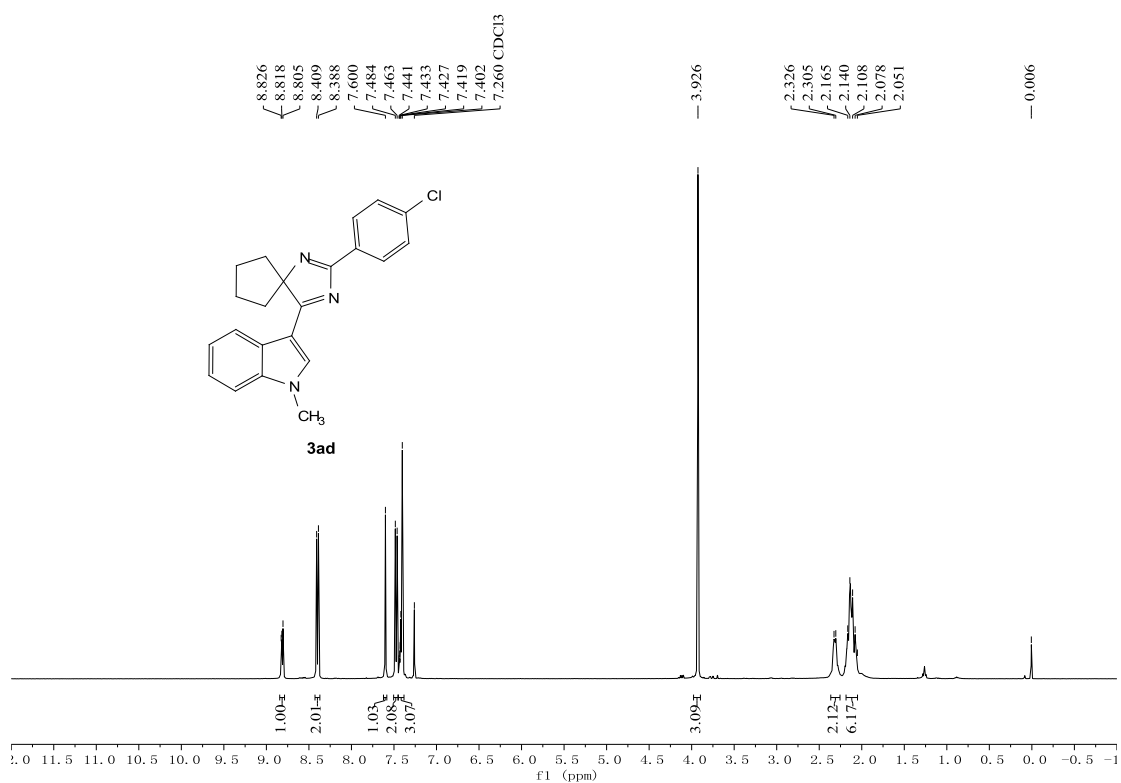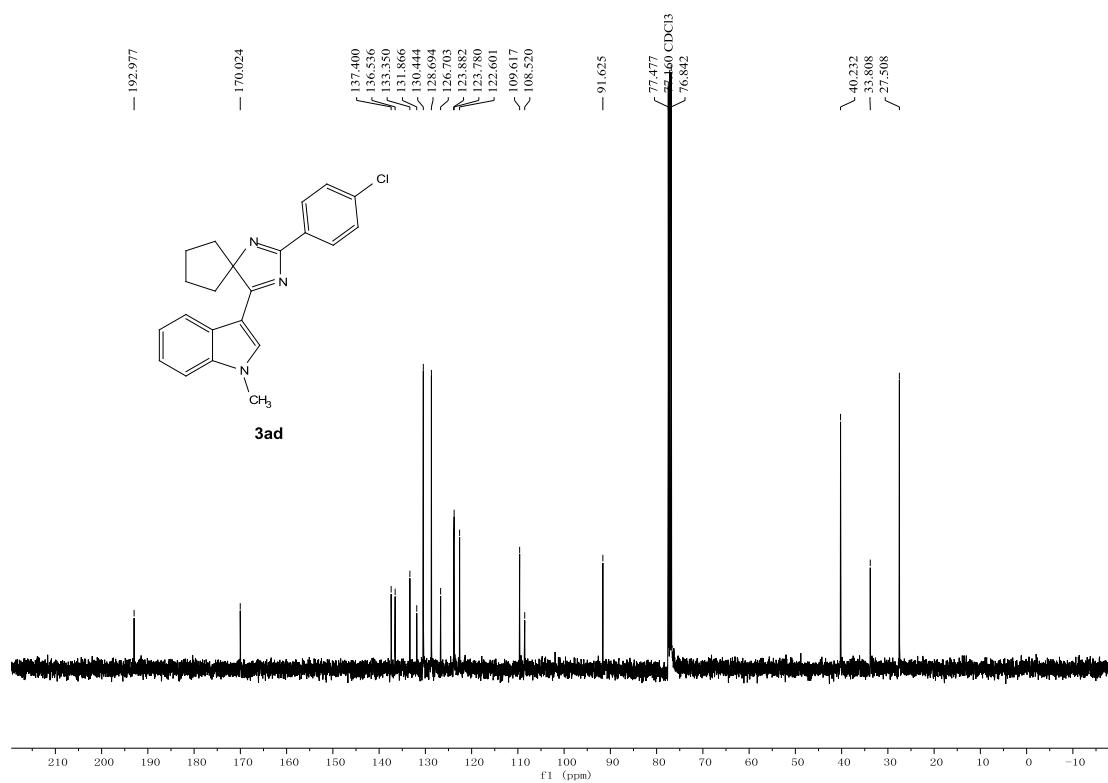

$^1\text{H}$  NMR (400 MHz) and  $^{13}\text{C}$  NMR (100 MHz) spectra of **3ae** ( $\text{CDCl}_3$ )

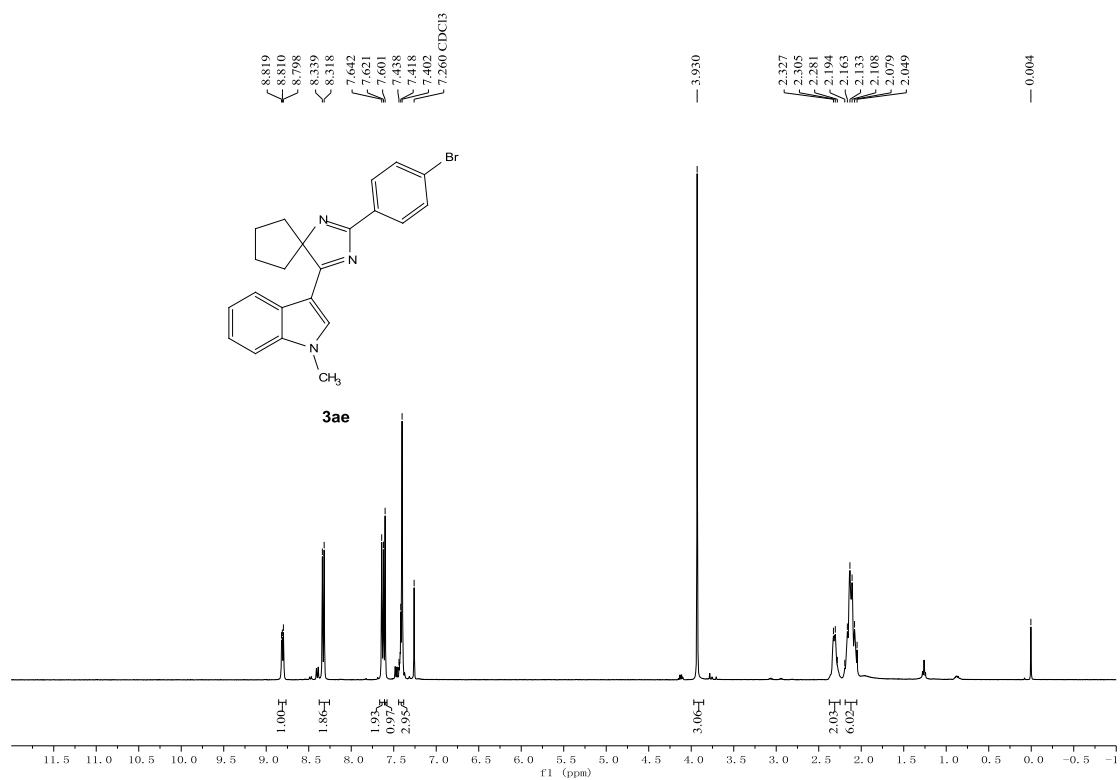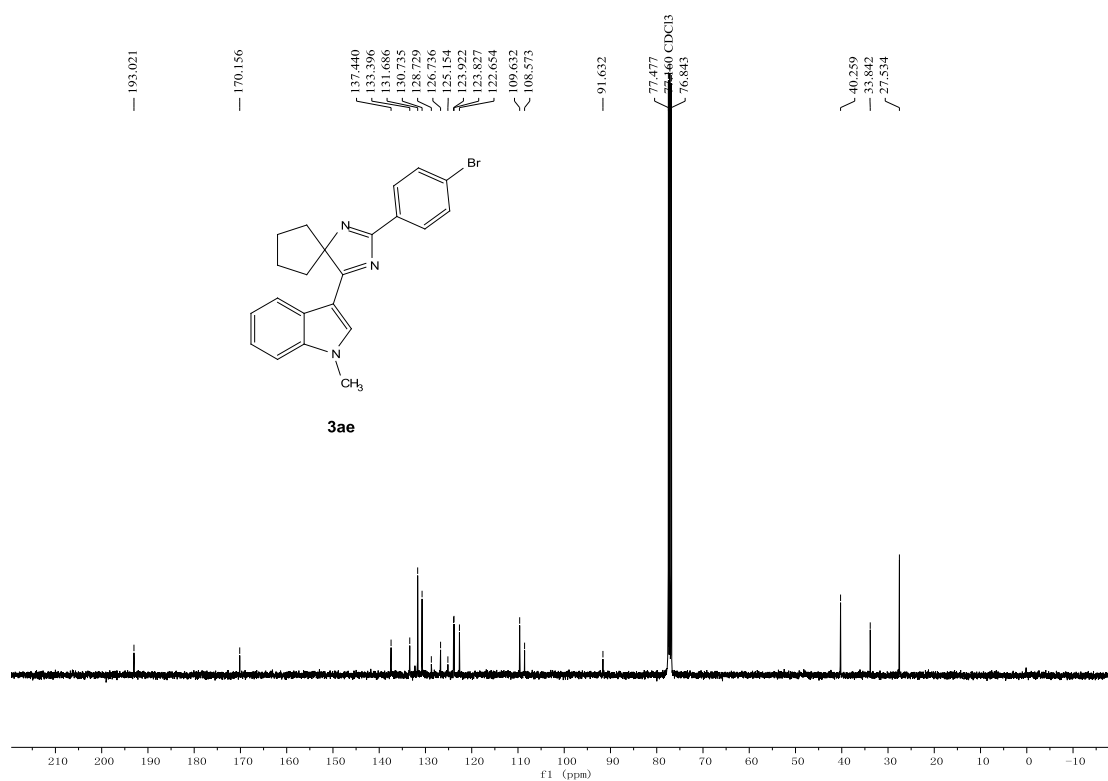

$^1\text{H}$  NMR (400 MHz) and  $^{13}\text{C}$  NMR (100 MHz) spectra of **3af** ( $\text{CDCl}_3$ )

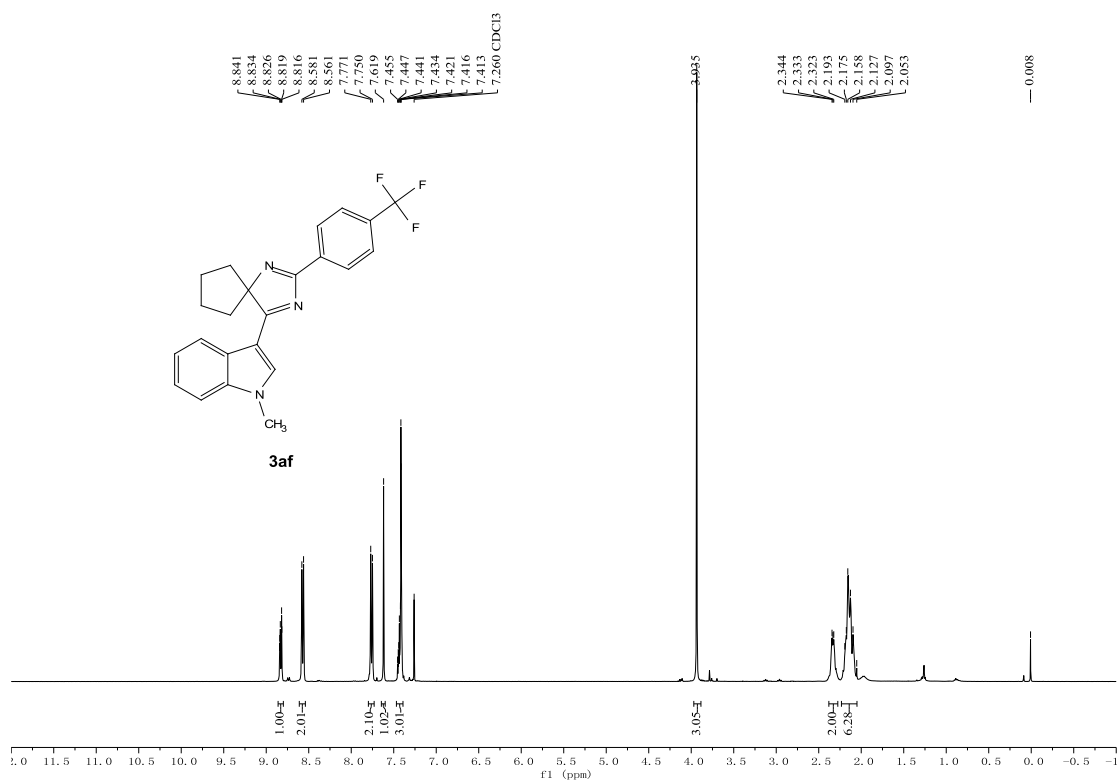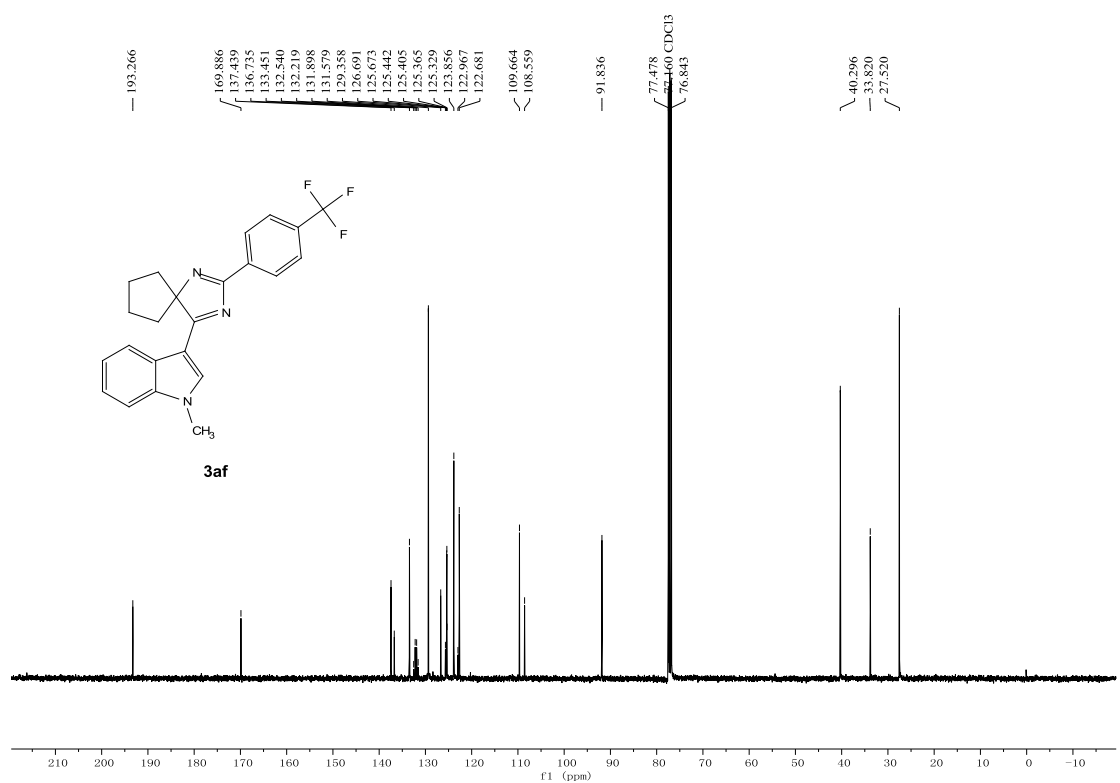

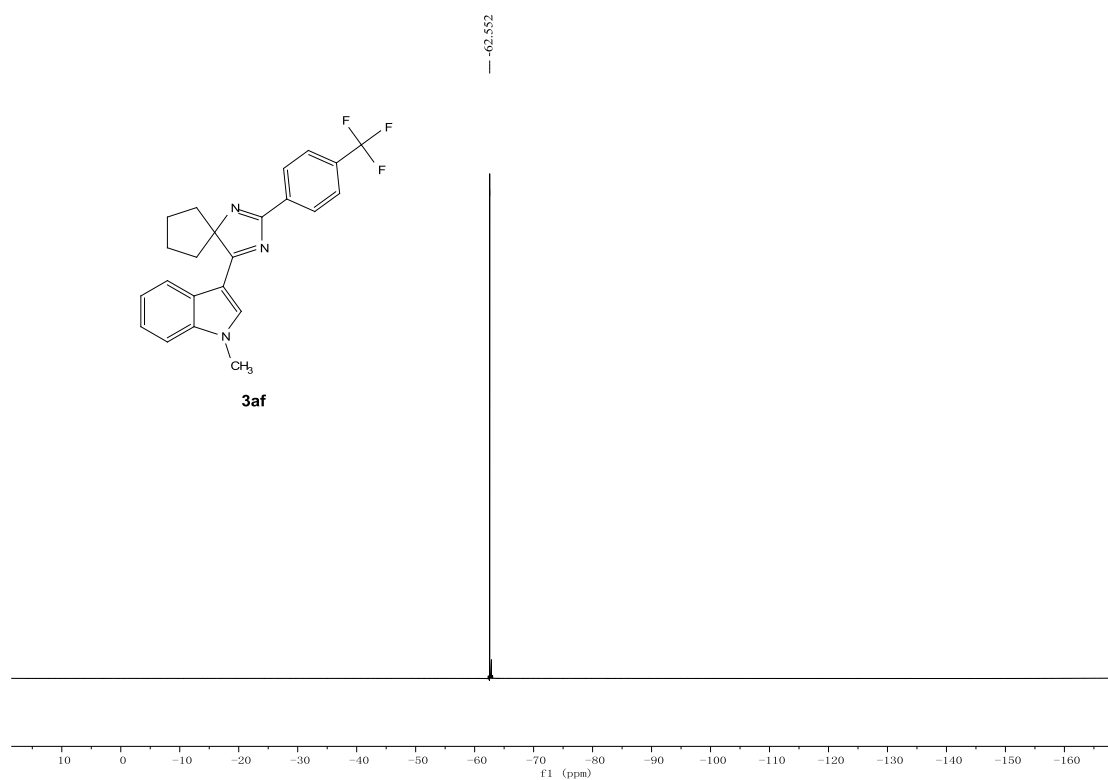

**$^1\text{H}$  NMR (400 MHz) and  $^{13}\text{C}$  NMR (100 MHz) spectra of **3ag** ( $\text{CDCl}_3$ )**

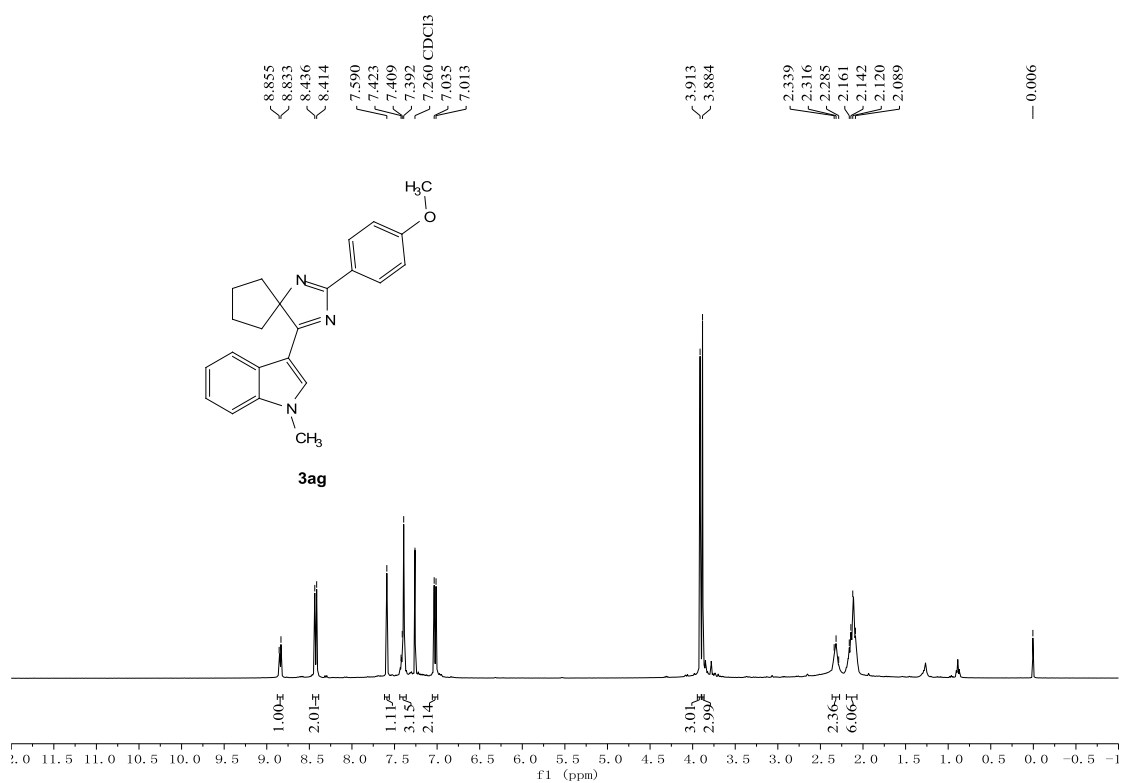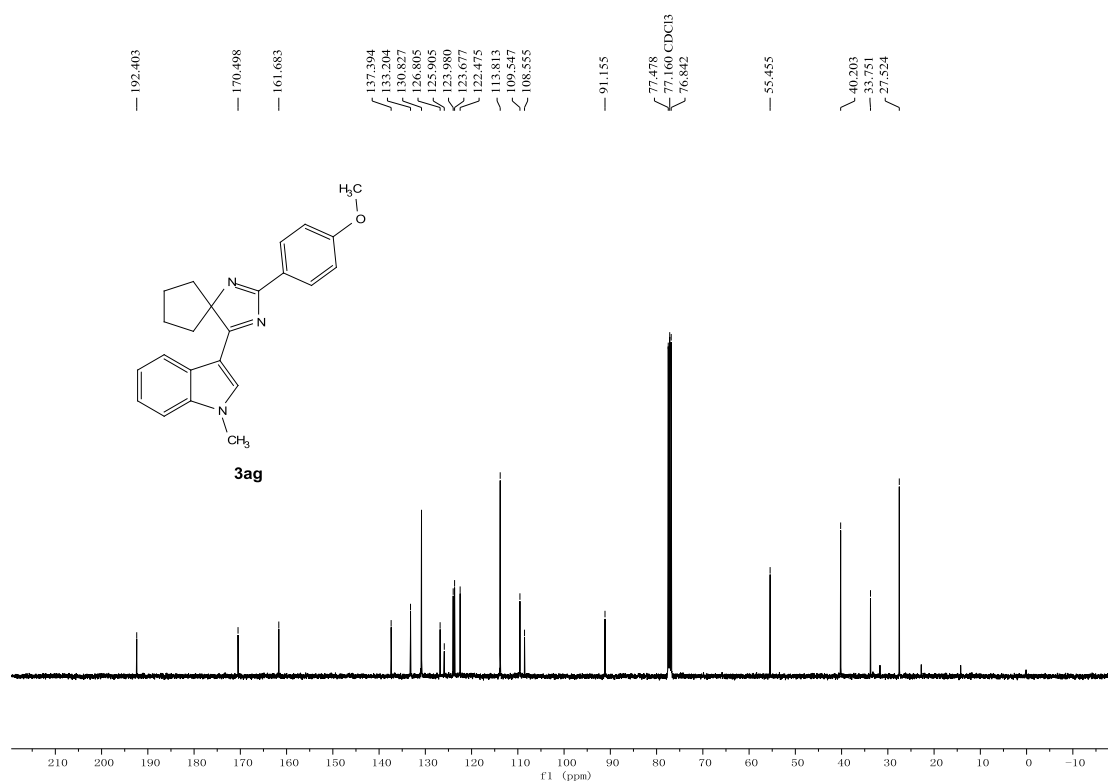

**$^1\text{H}$  NMR (400 MHz) and  $^{13}\text{C}$  NMR (100 MHz) spectra of **3ah** ( $\text{CDCl}_3$ )**

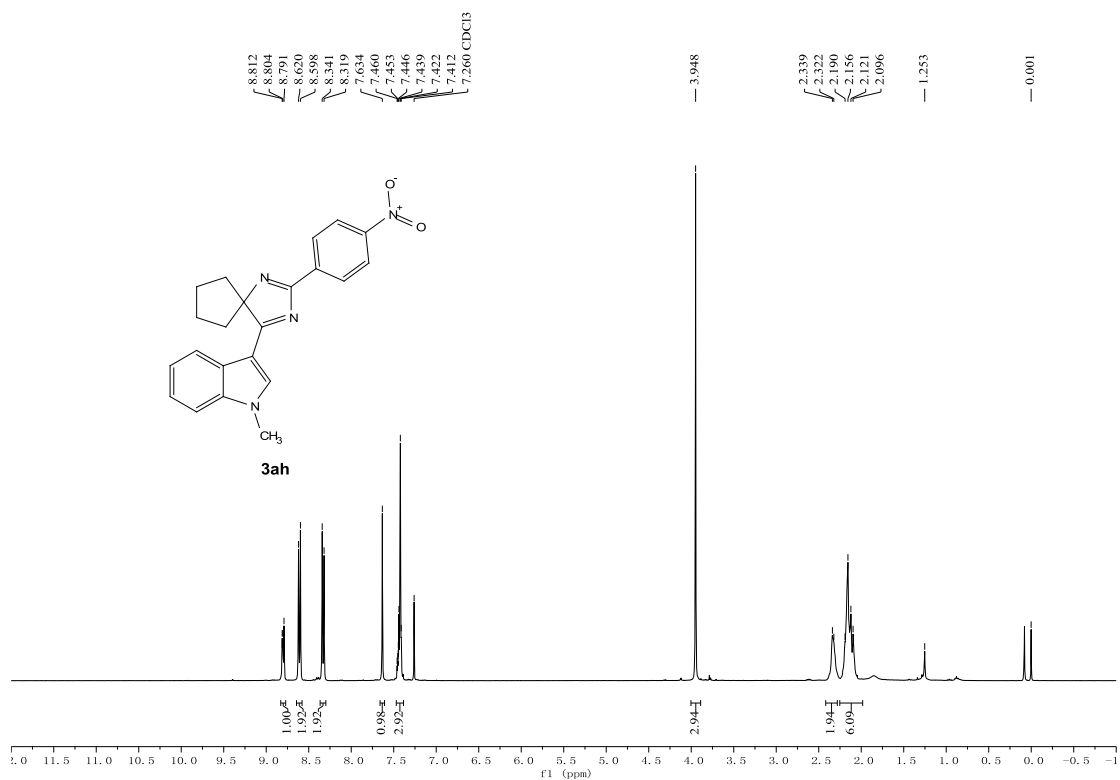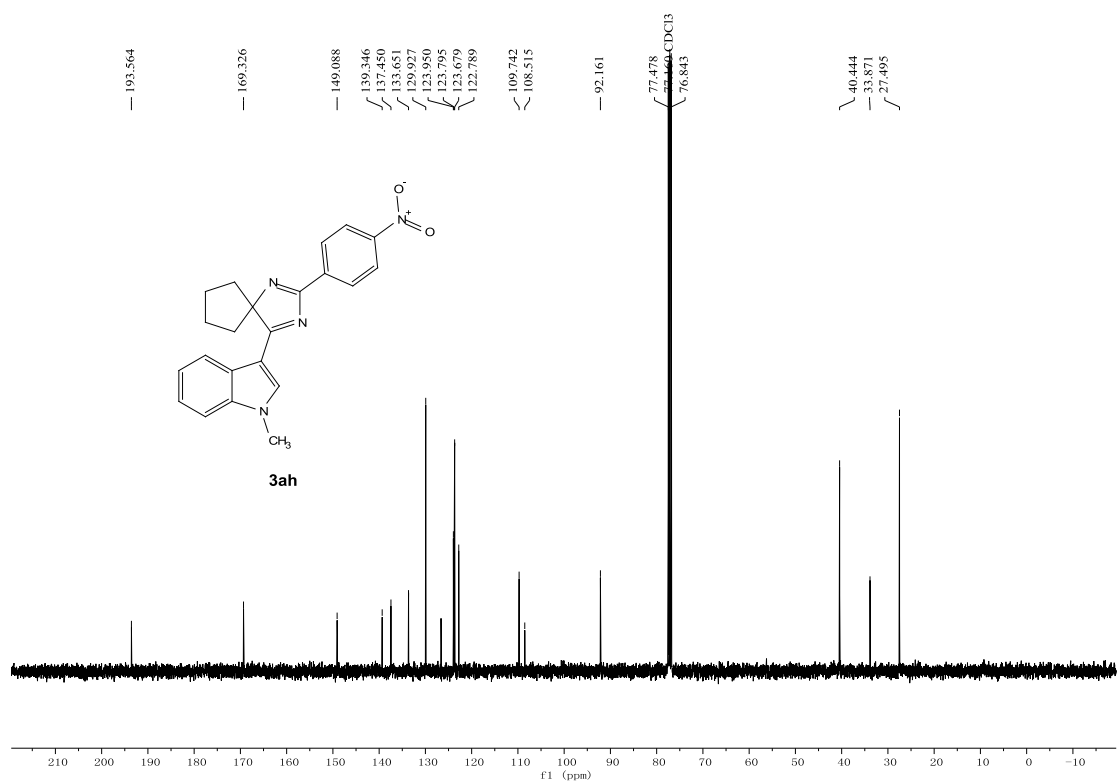

**$^1\text{H}$  NMR (400 MHz) and  $^{13}\text{C}$  NMR (100 MHz) spectra of **3ai** ( $\text{CDCl}_3$ )**

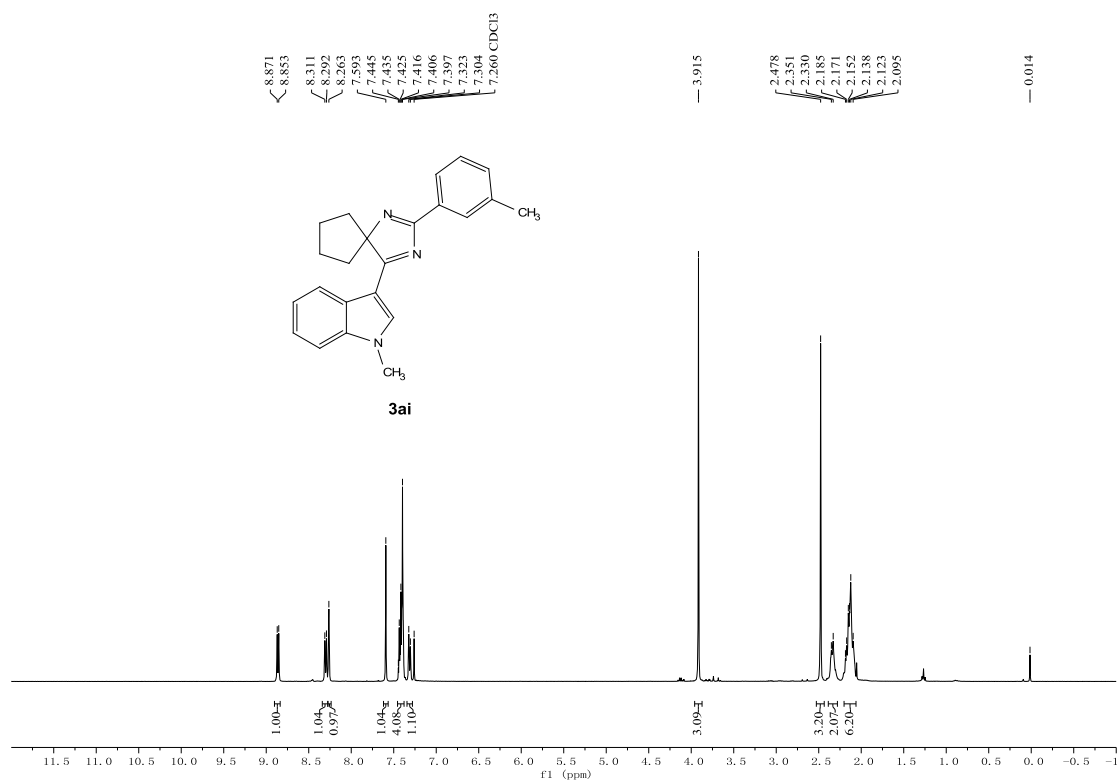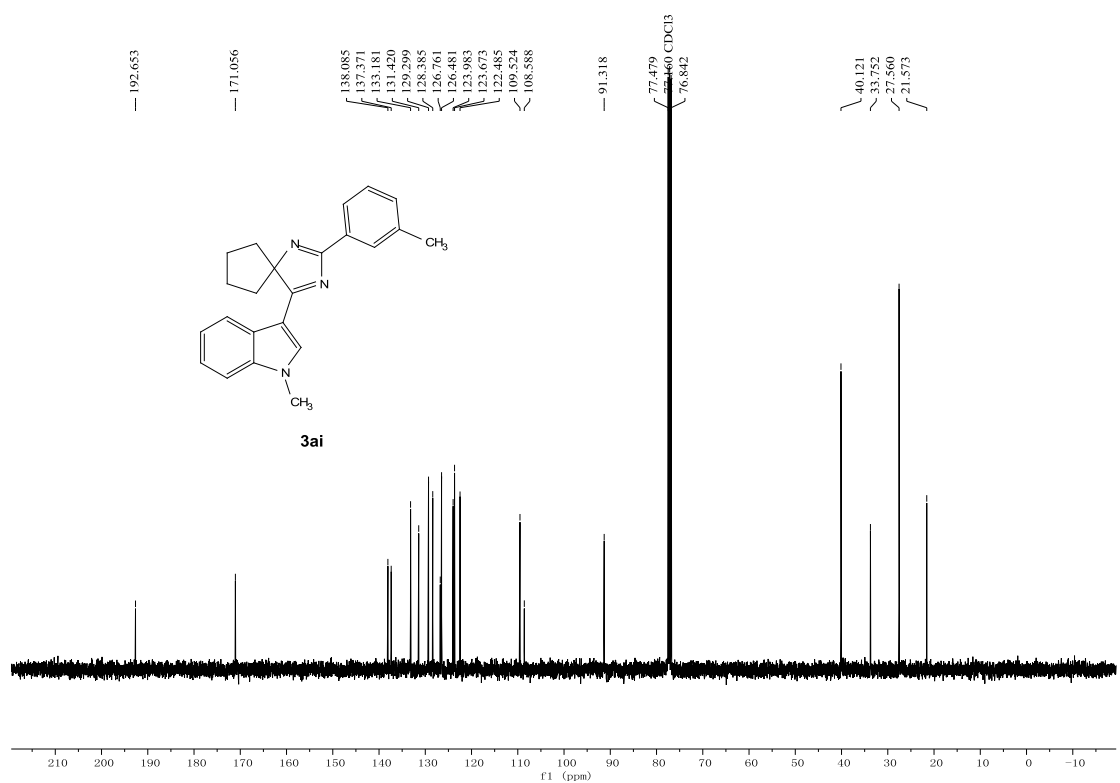

$^1\text{H}$  NMR (400 MHz) and  $^{13}\text{C}$  NMR (100 MHz) spectra of **3aj** ( $\text{CDCl}_3$ )

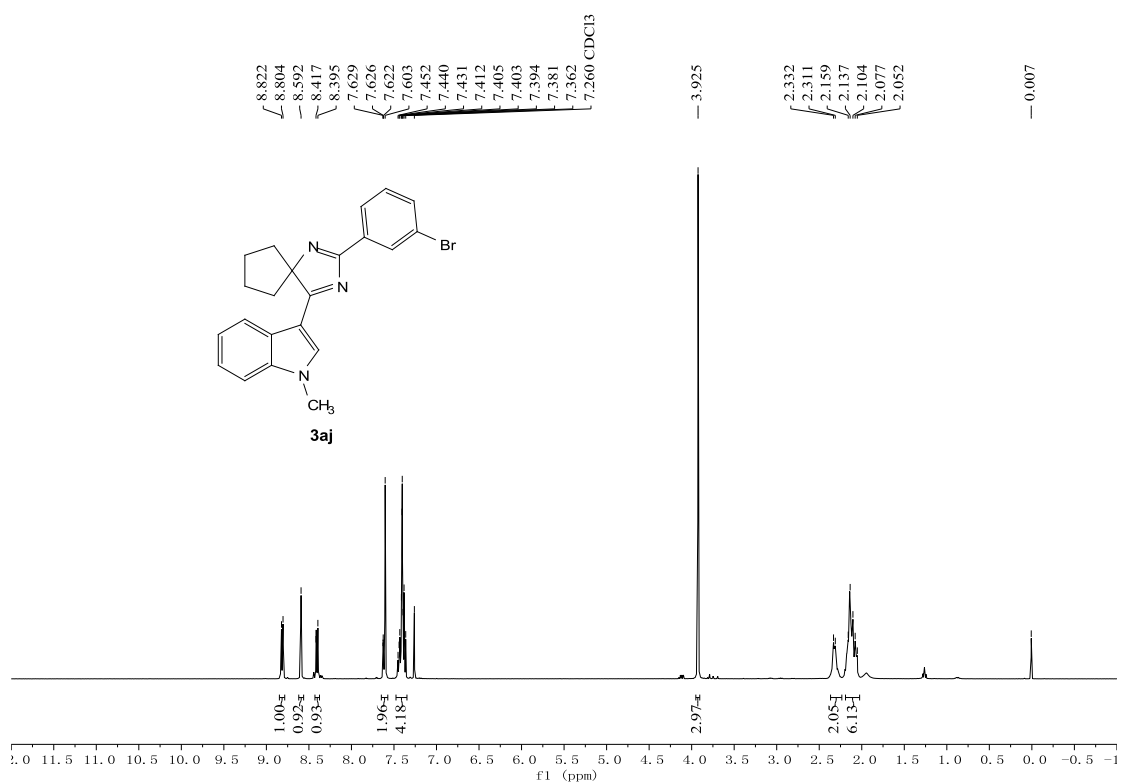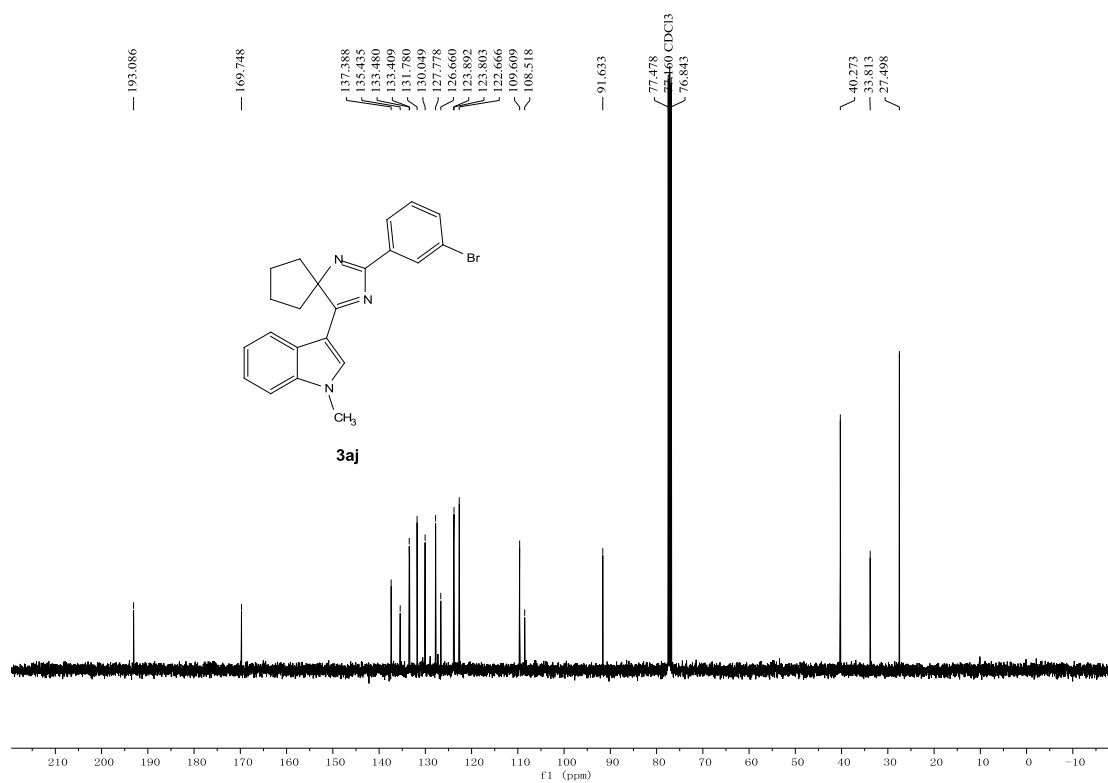

**$^1\text{H}$  NMR (400 MHz) and  $^{13}\text{C}$  NMR (100 MHz) spectra of **3ak** ( $\text{CDCl}_3$ )**

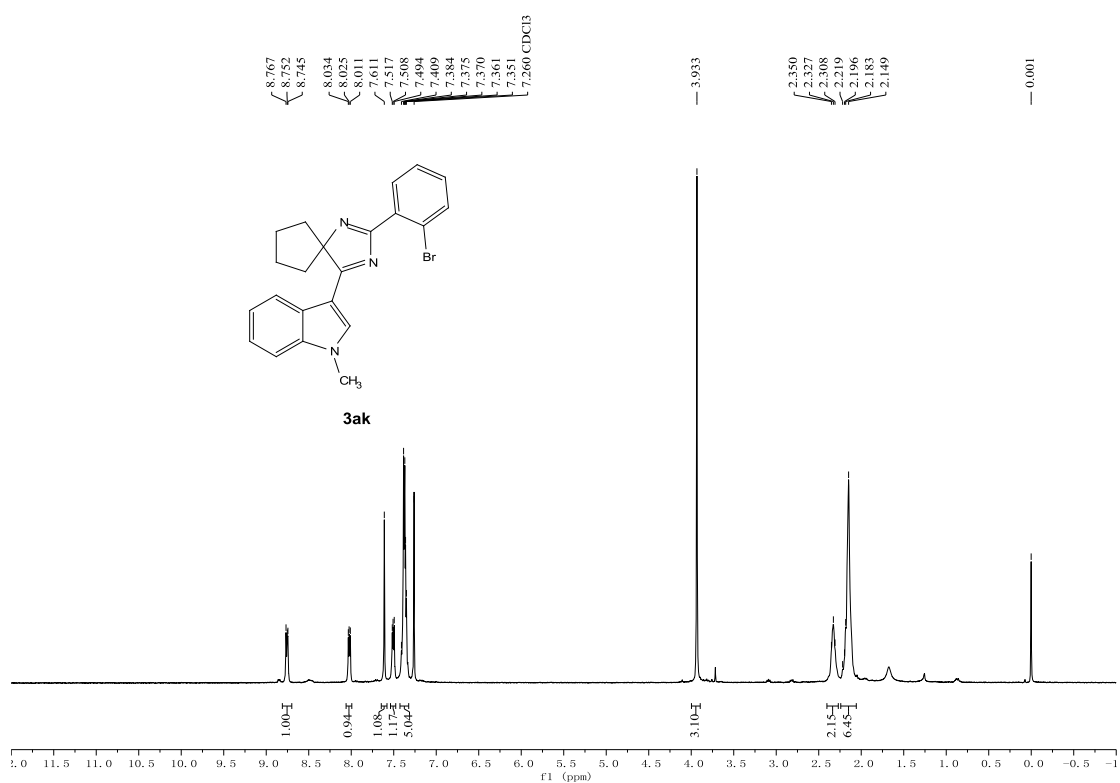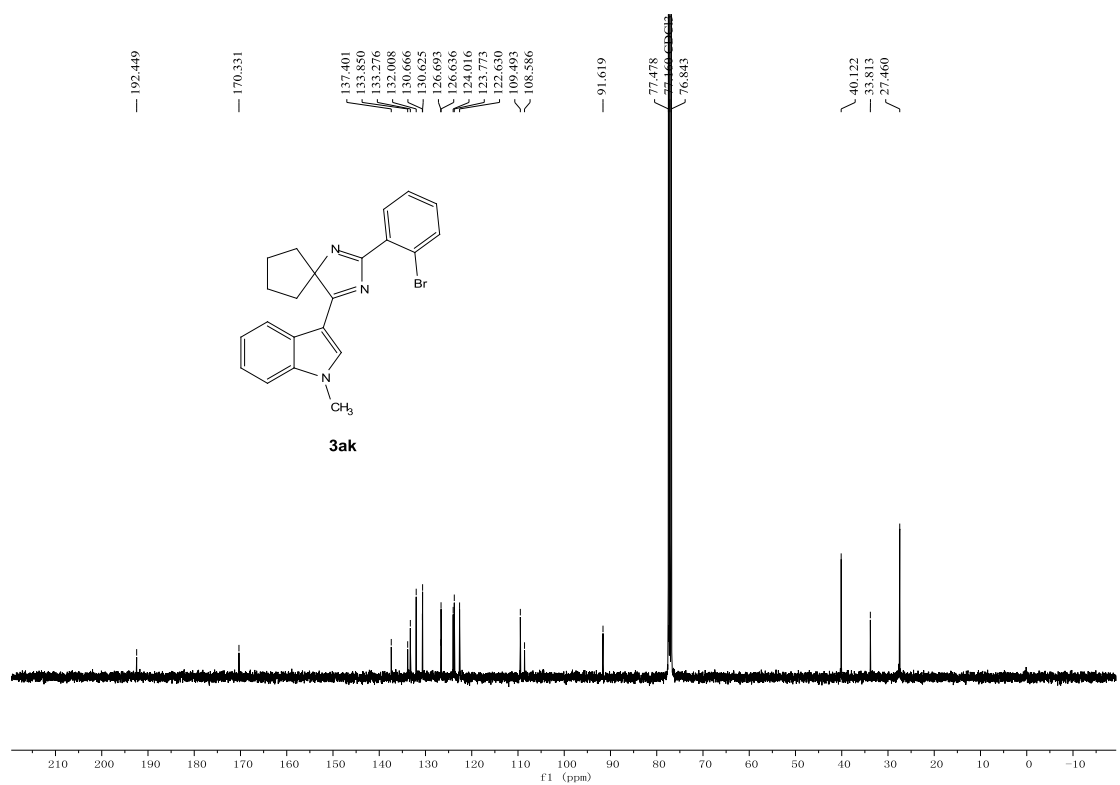

**$^1\text{H}$  NMR (400 MHz) and  $^{13}\text{C}$  NMR (100 MHz) spectra of **3al** ( $\text{CDCl}_3$ )**

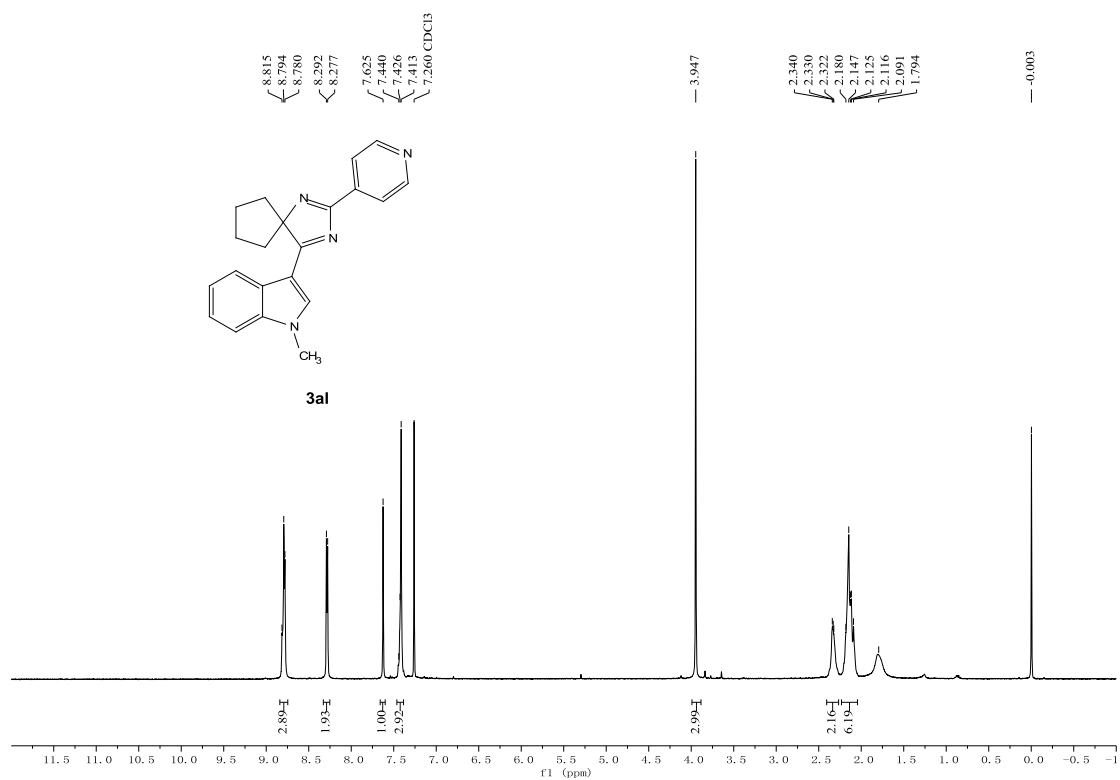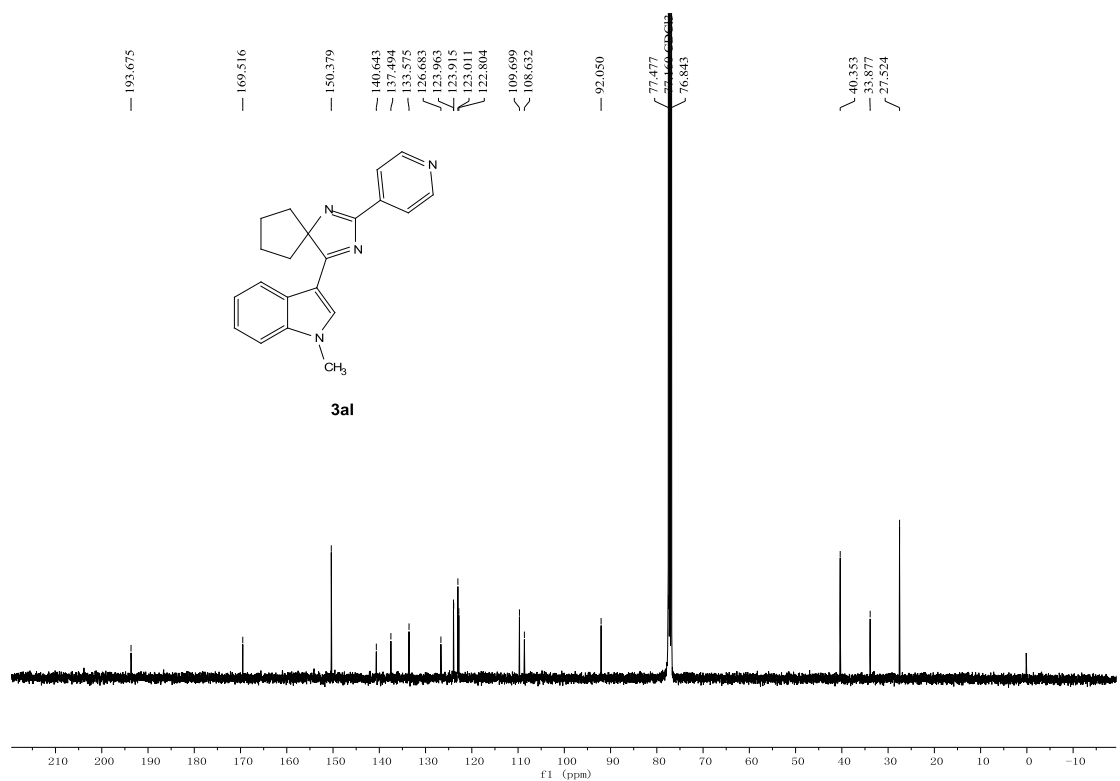

$^1\text{H}$  NMR (400 MHz) and  $^{13}\text{C}$  NMR (100 MHz) spectra of **3ba** ( $\text{CDCl}_3$ )

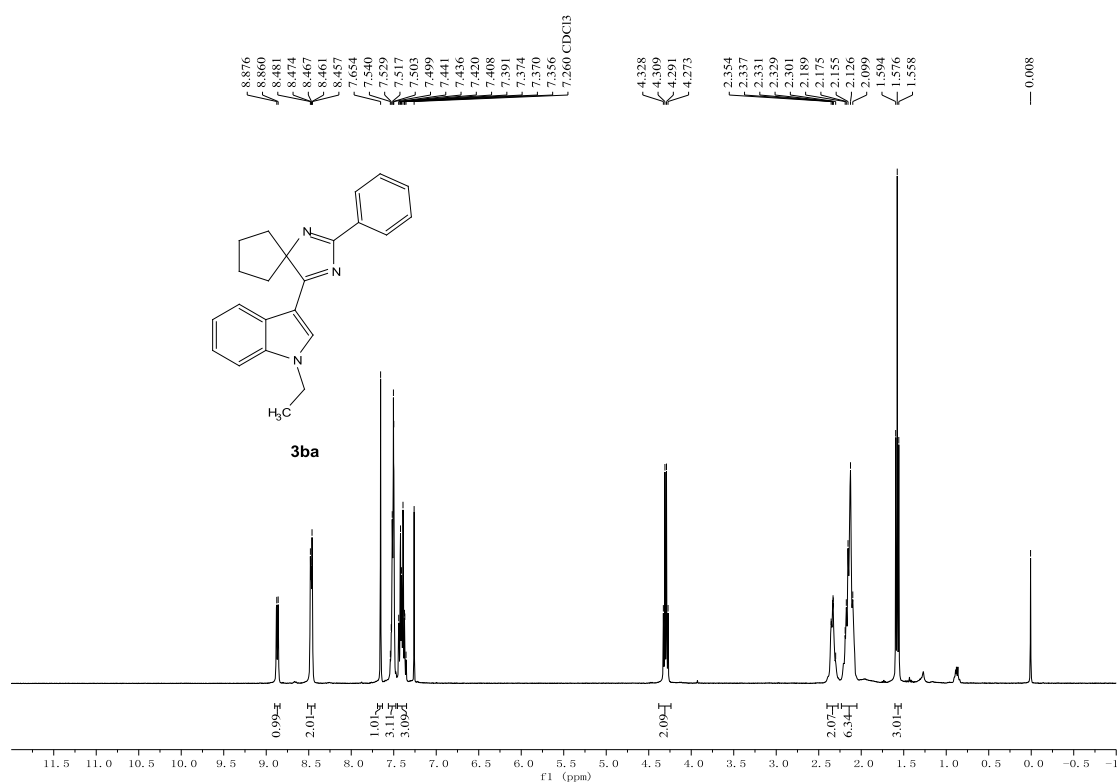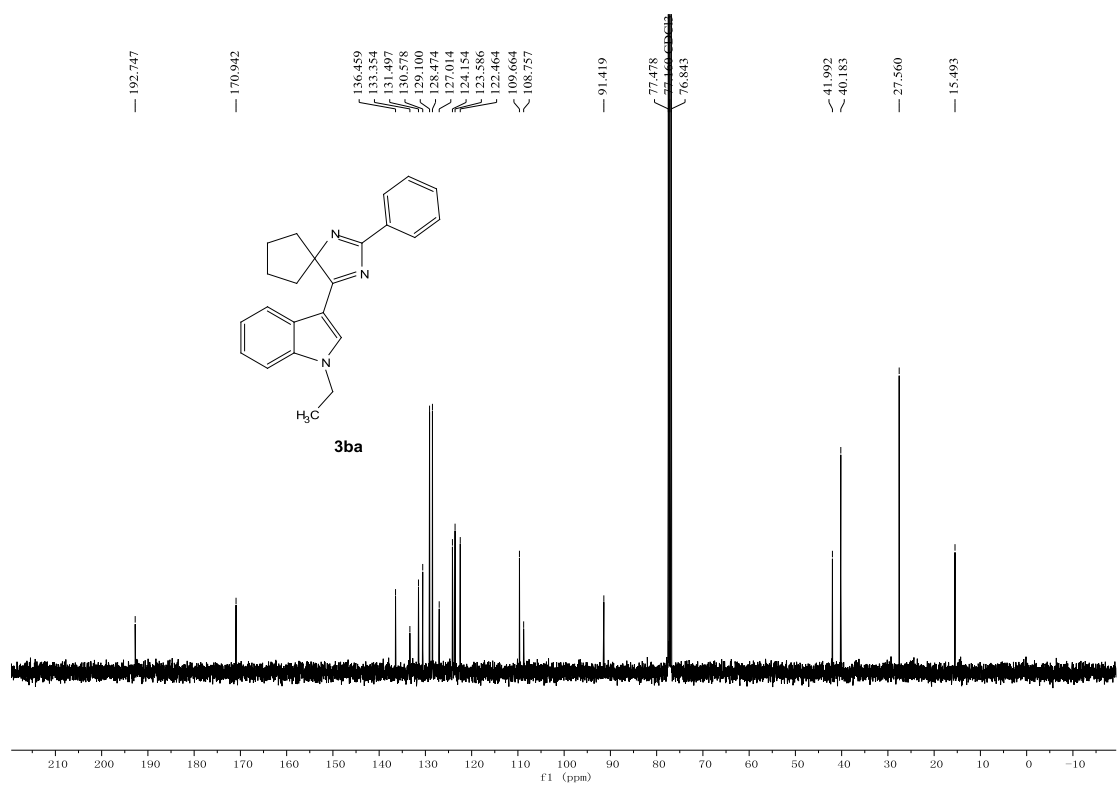

**$^1\text{H}$  NMR (400 MHz) and  $^{13}\text{C}$  NMR (100 MHz) spectra of **3ca** ( $\text{CDCl}_3$ )**

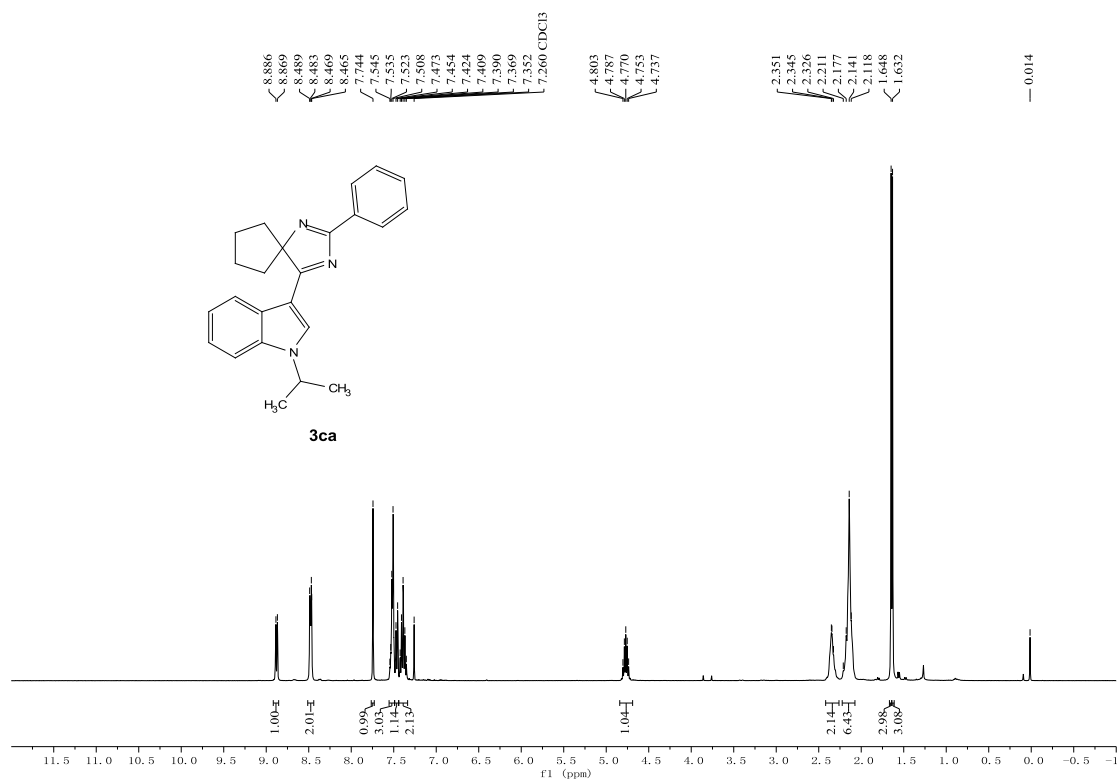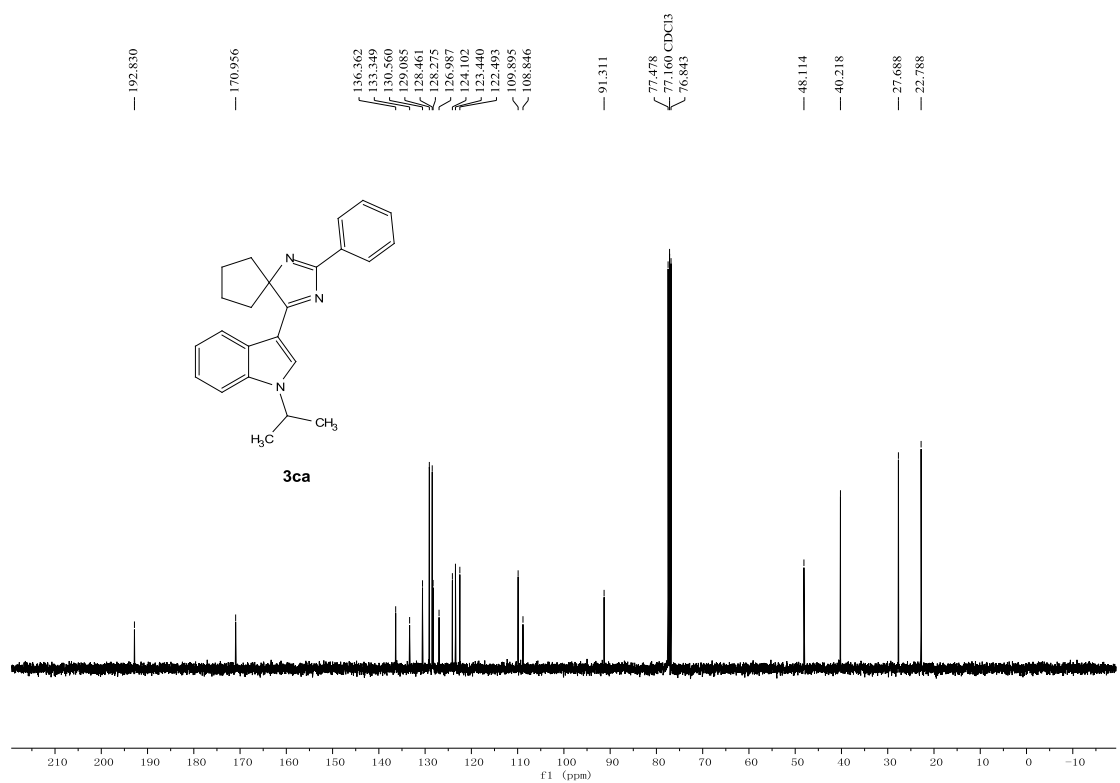

**$^1\text{H}$  NMR (400 MHz) and  $^{13}\text{C}$  NMR (100 MHz) spectra of **3da** ( $\text{CDCl}_3$ )**

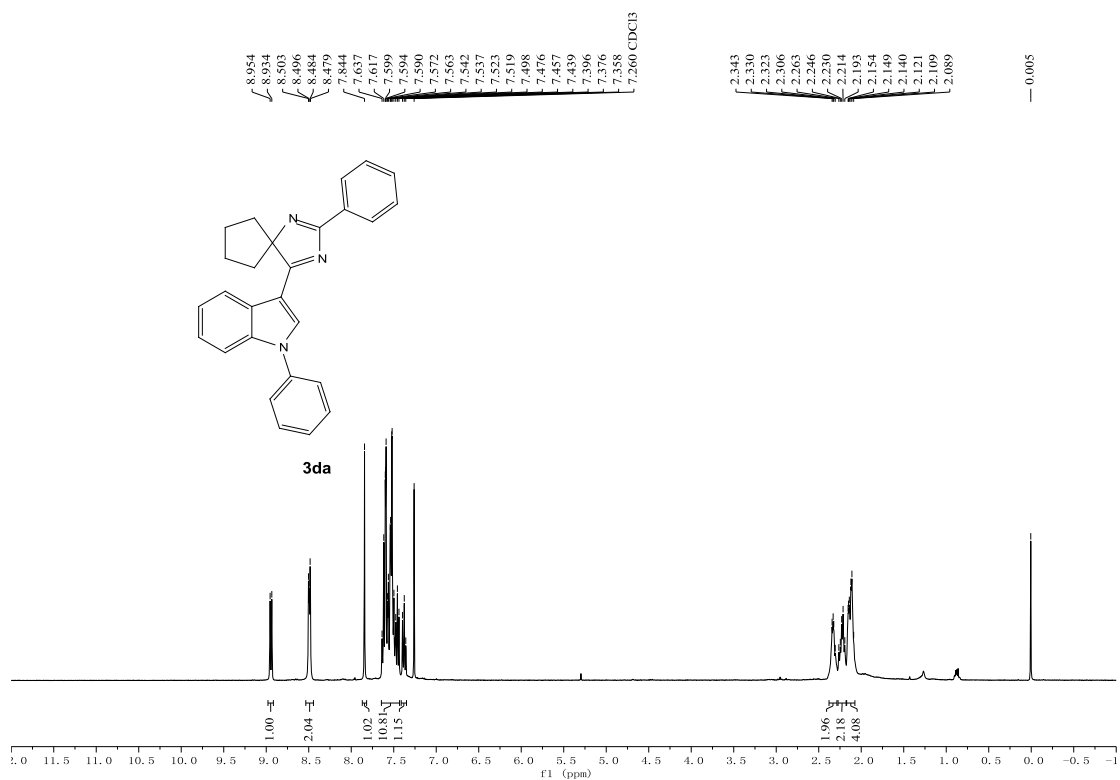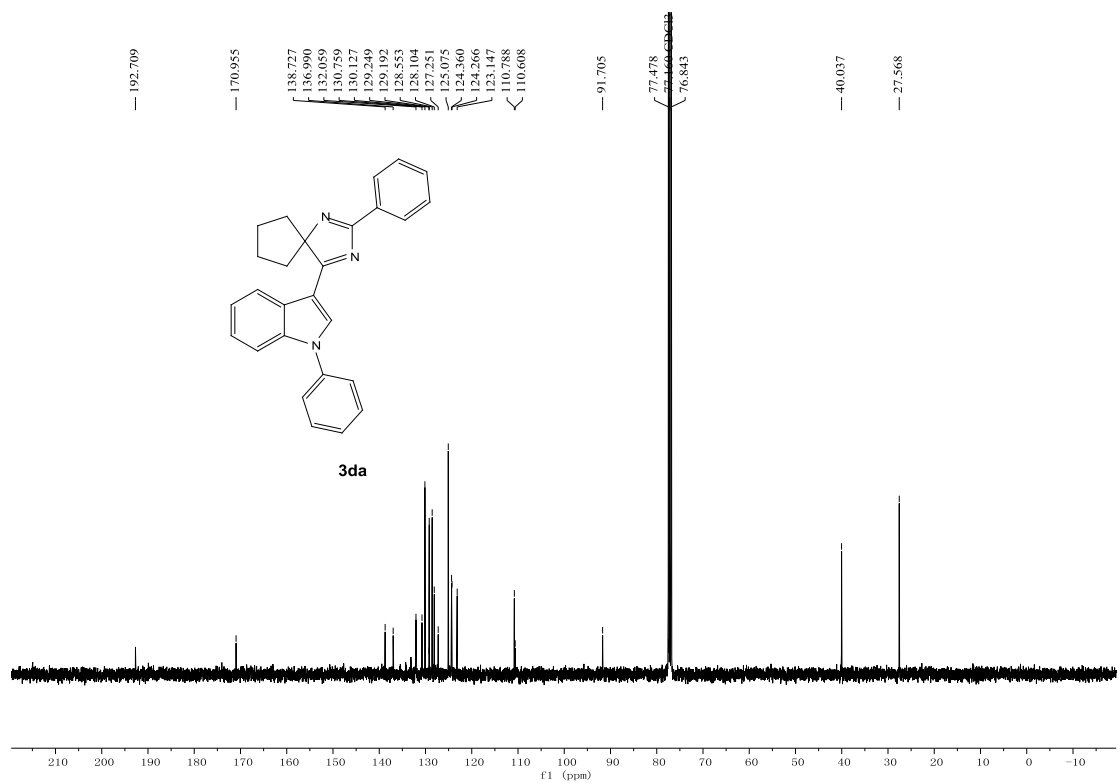

**$^1\text{H}$  NMR (400 MHz) and  $^{13}\text{C}$  NMR (100 MHz) spectra of **3ea** ( $\text{CDCl}_3$ )**

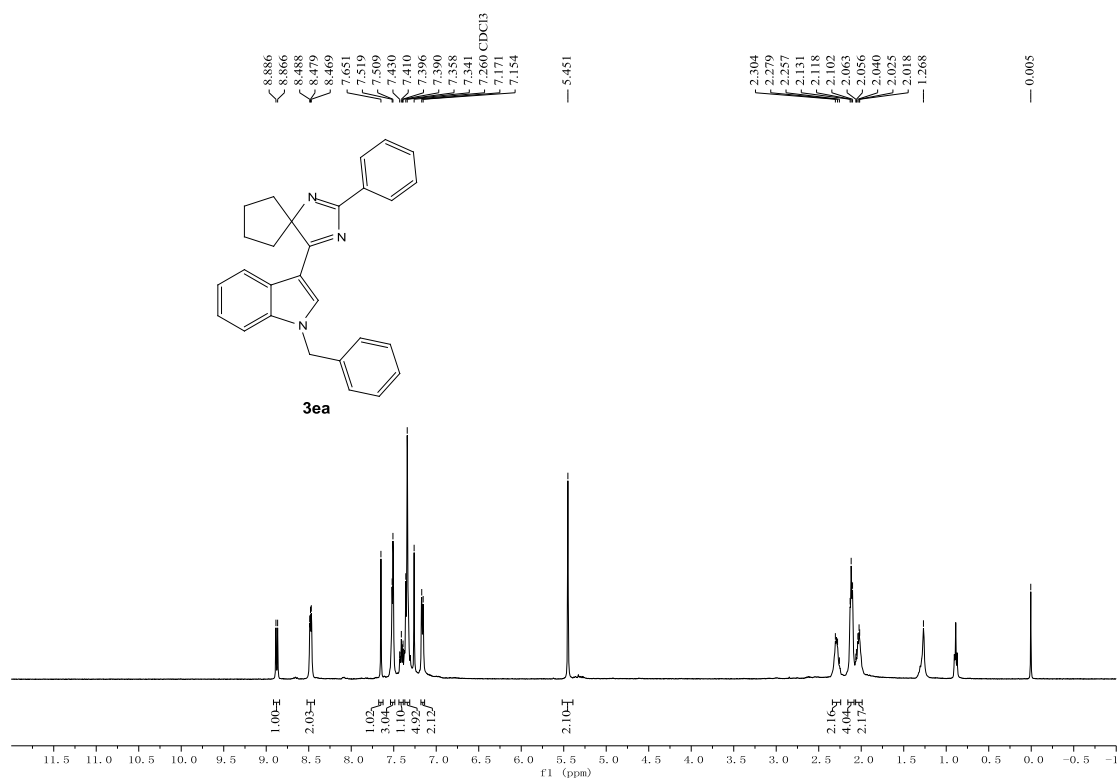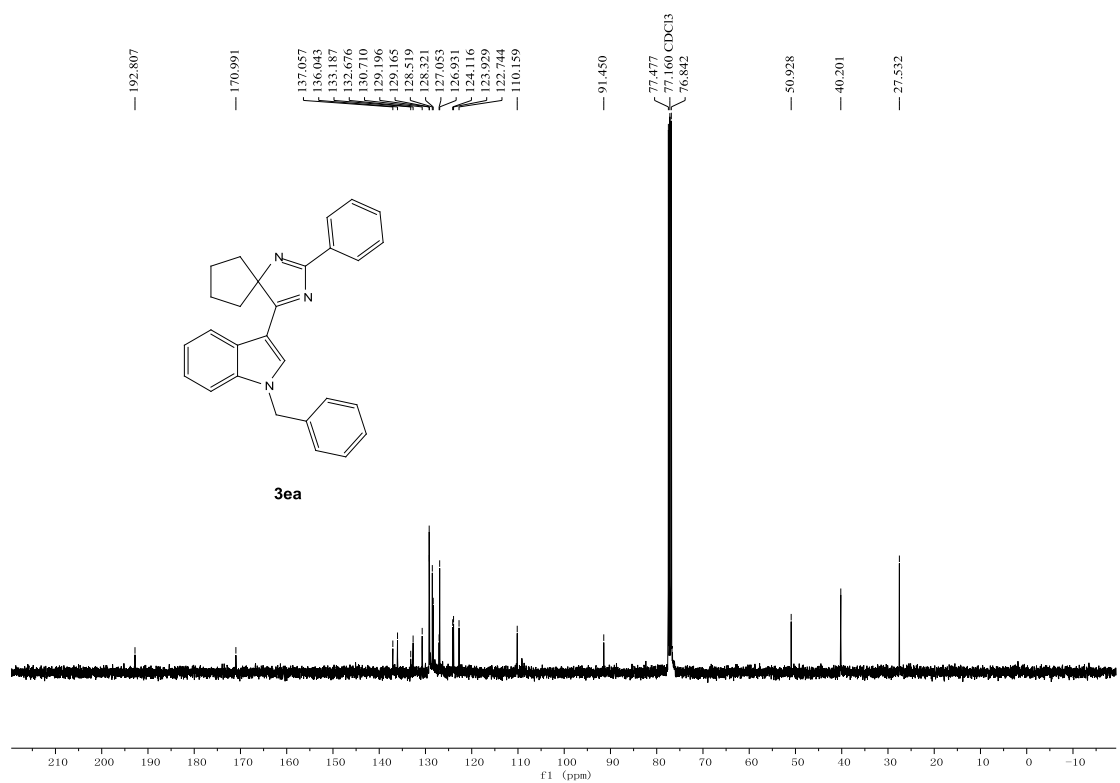

**$^1\text{H}$  NMR (400 MHz) and  $^{13}\text{C}$  NMR (100 MHz) spectra of **3fa** ( $\text{CDCl}_3$ )**

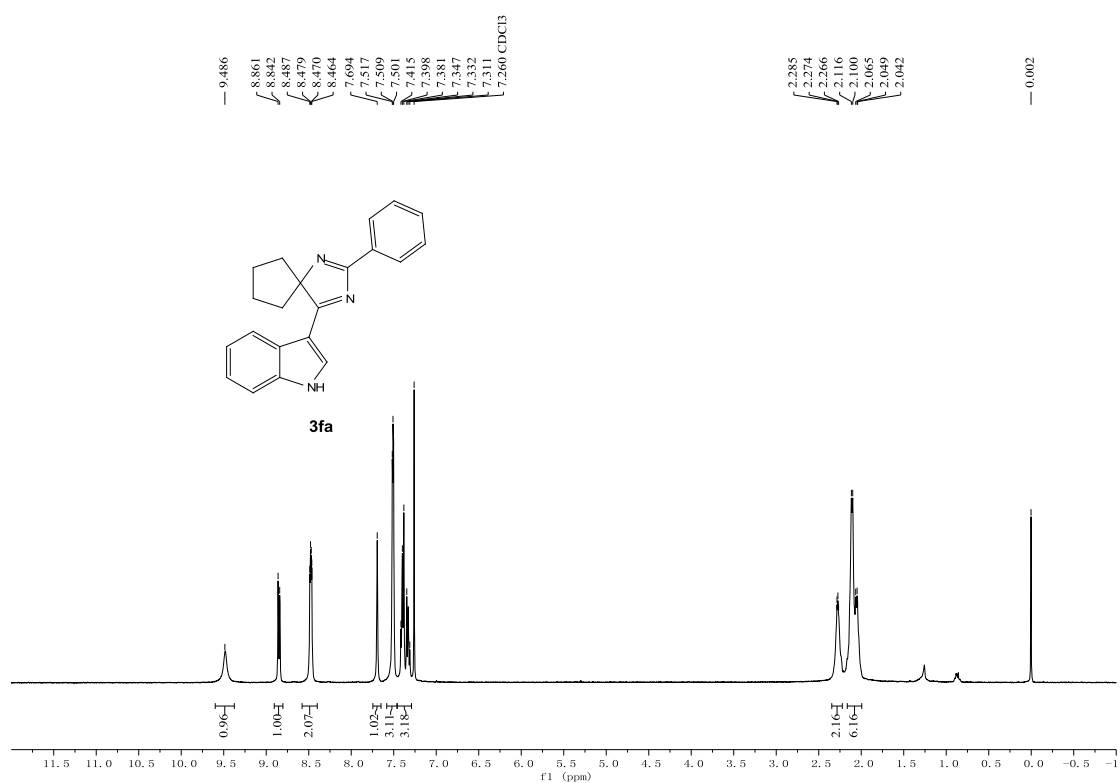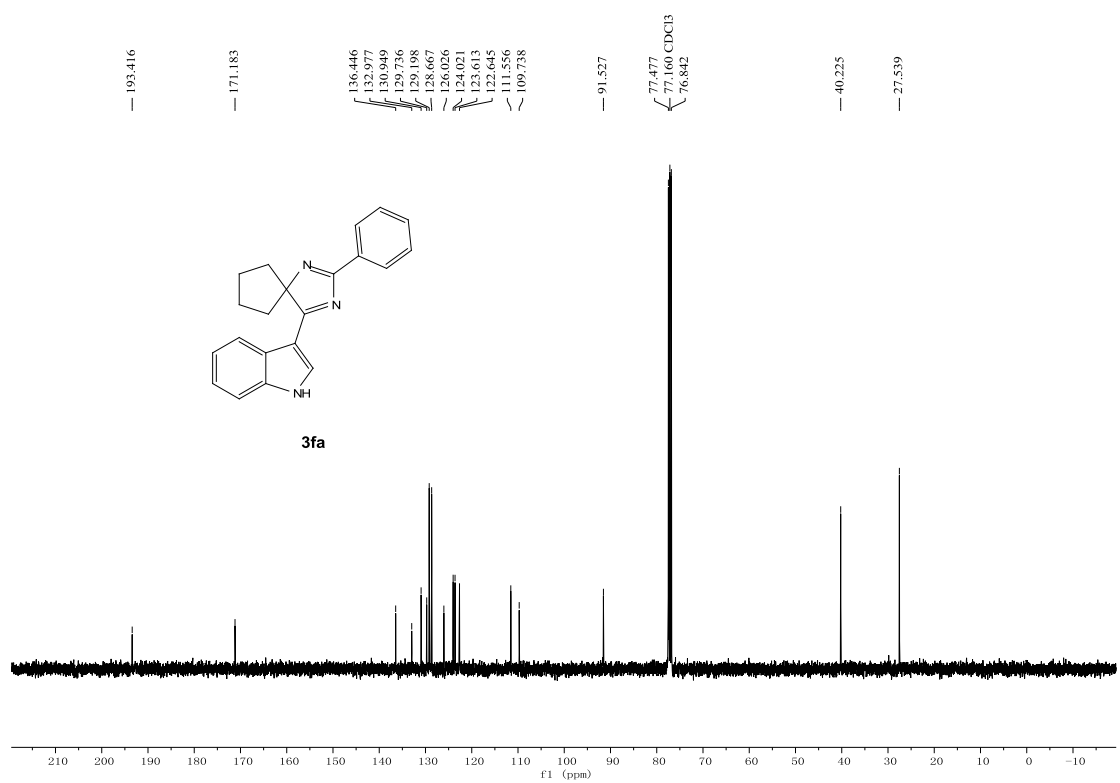

$^1\text{H}$  NMR (400 MHz) and  $^{13}\text{C}$  NMR (100 MHz) spectra of **3ga** ( $\text{CDCl}_3$ )

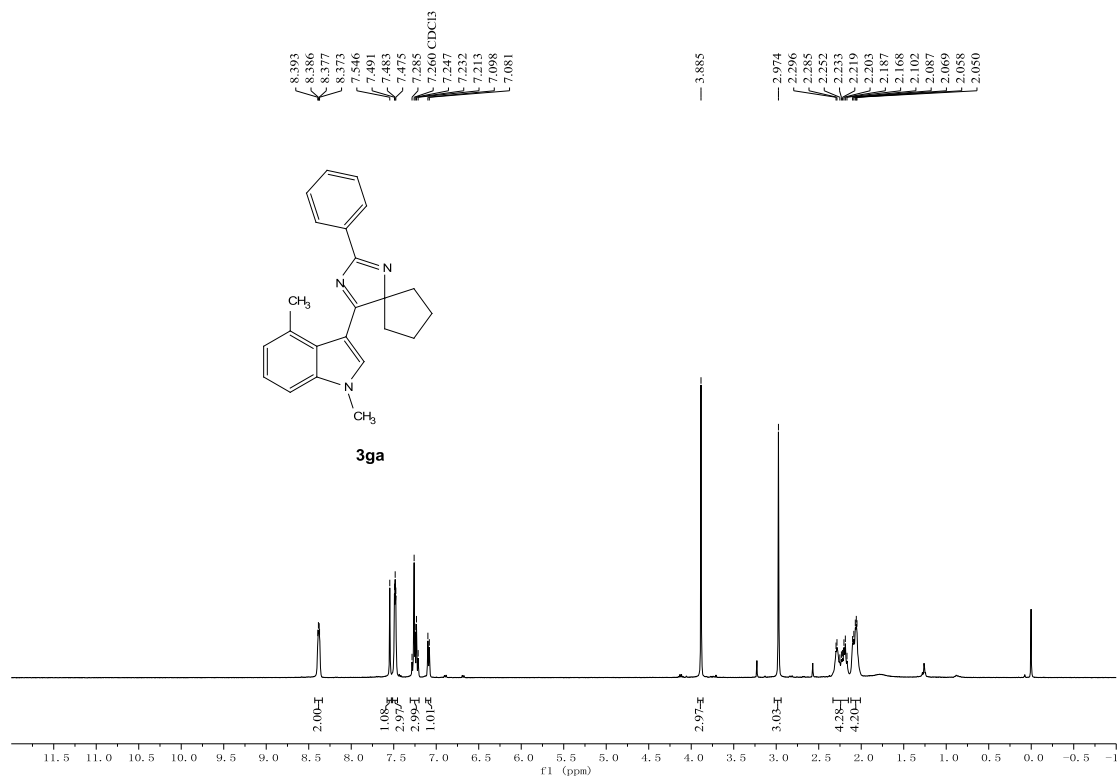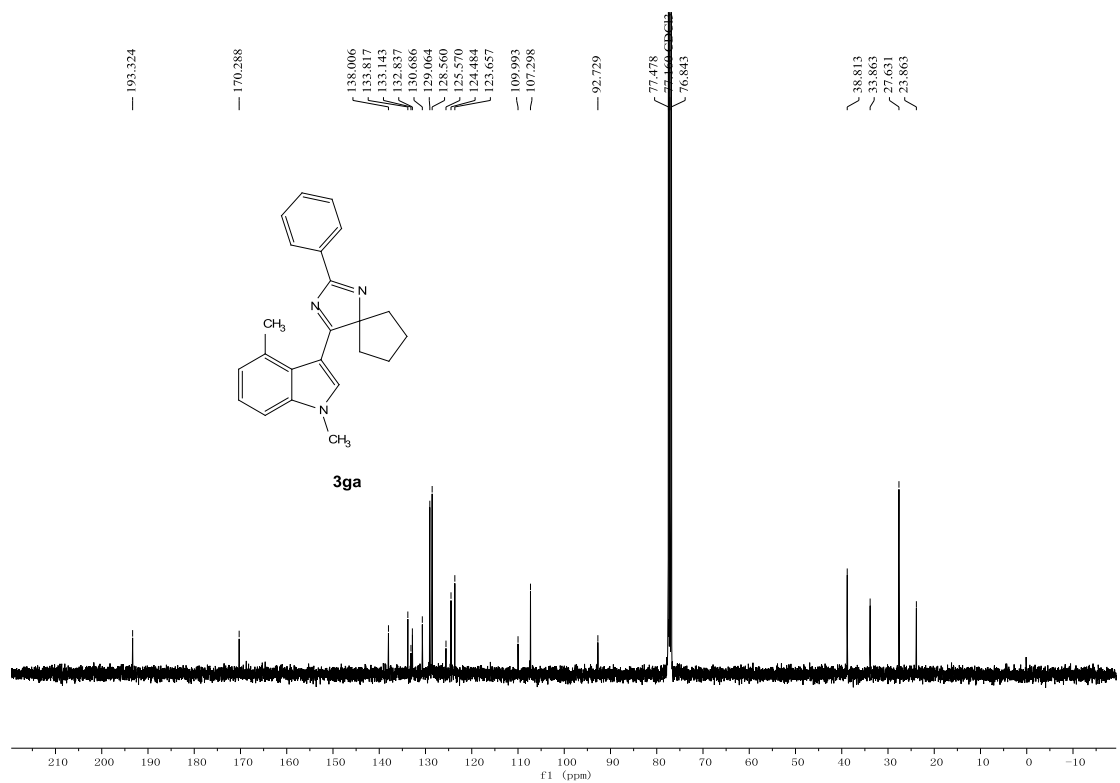

**$^1\text{H}$  NMR (400 MHz) and  $^{13}\text{C}$  NMR (100 MHz) spectra of **3ha** ( $\text{CDCl}_3$ )**

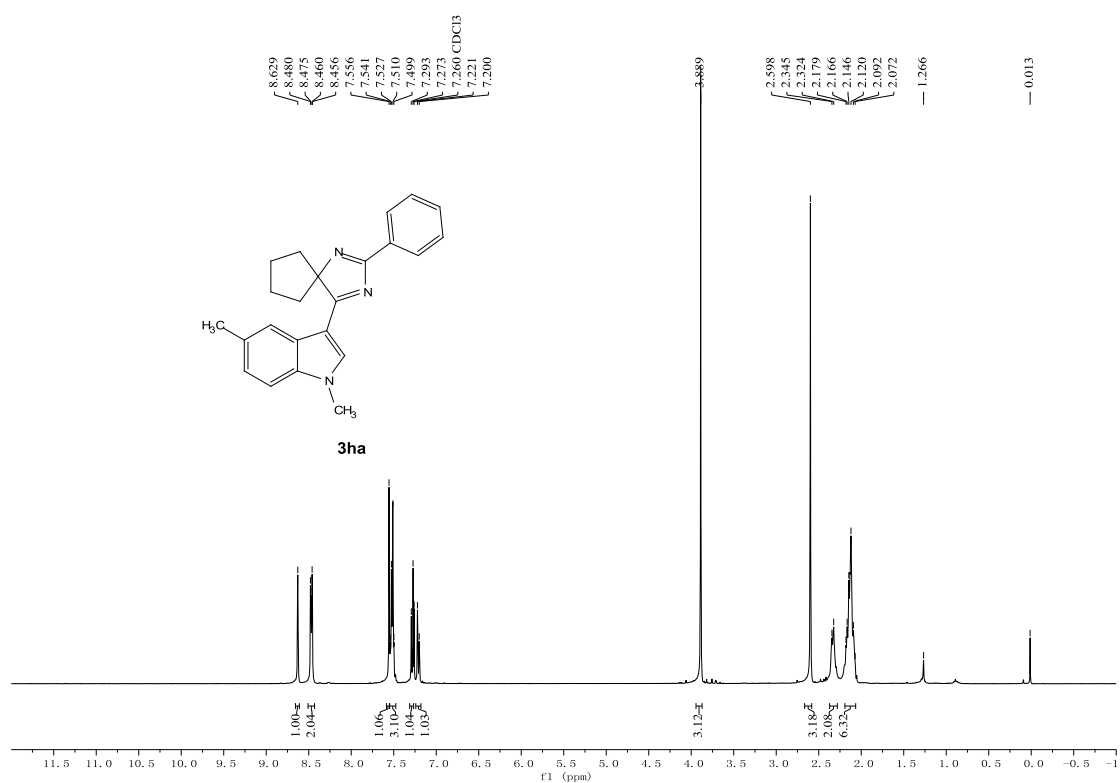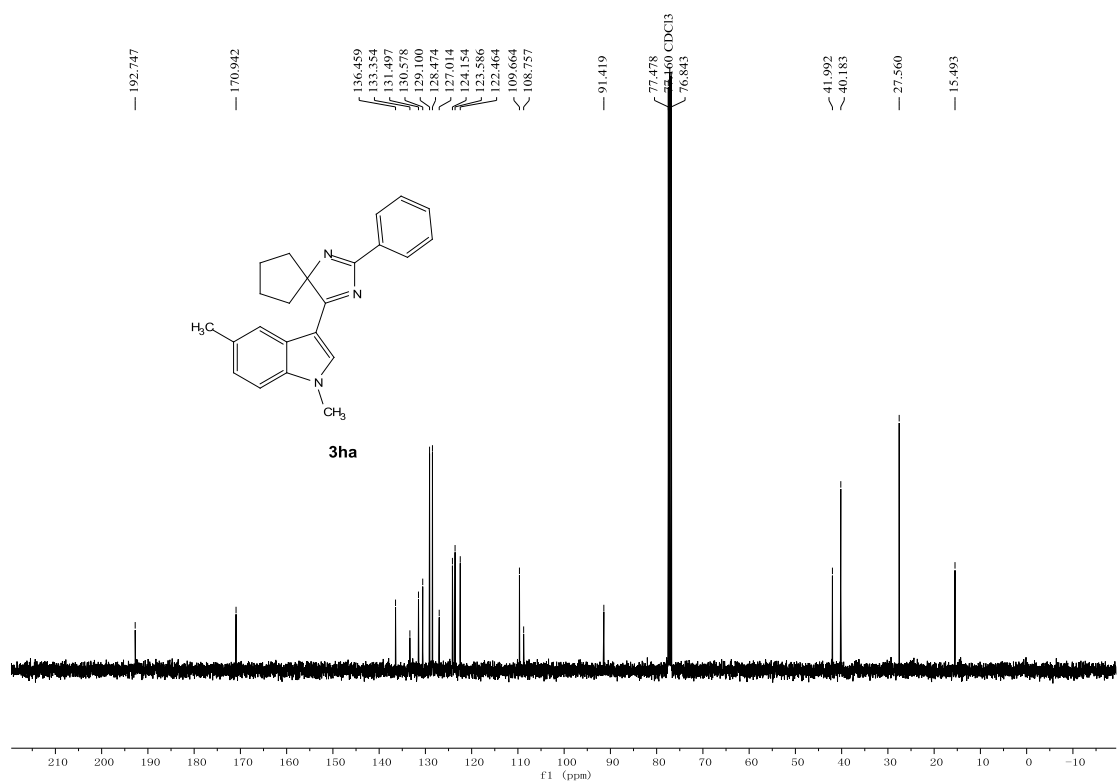

$^1\text{H}$  NMR (400 MHz) and  $^{13}\text{C}$  NMR (100 MHz) spectra of **3ia** ( $\text{CDCl}_3$ )

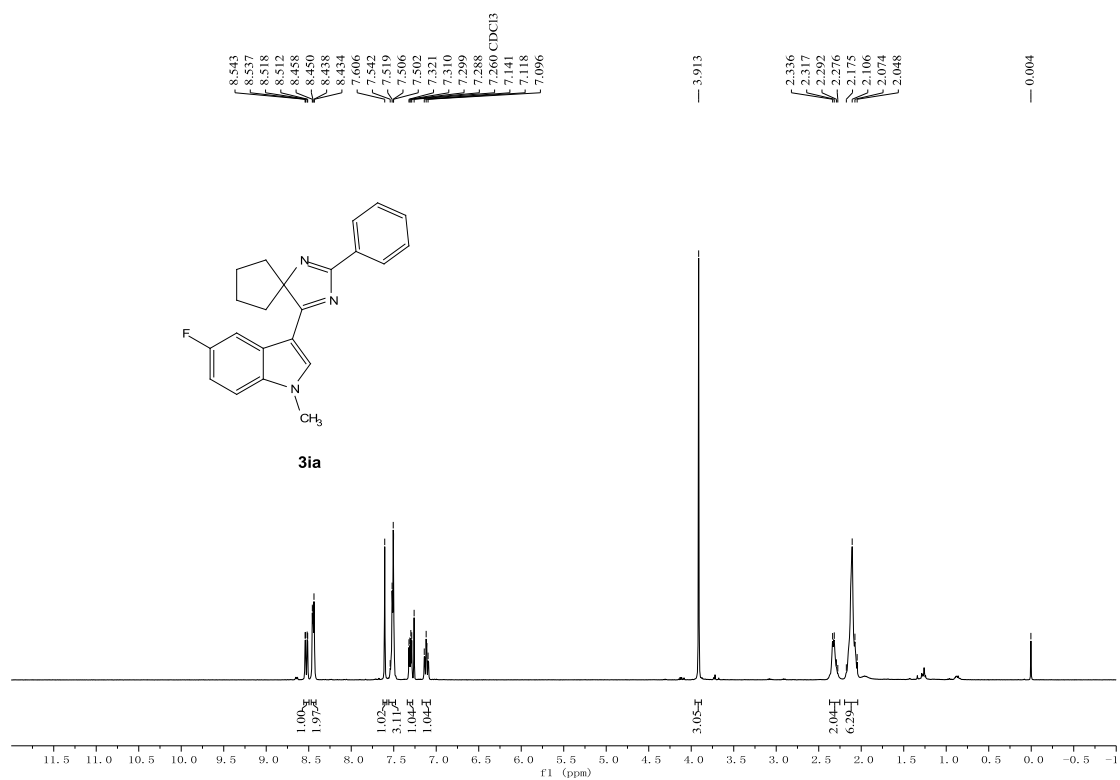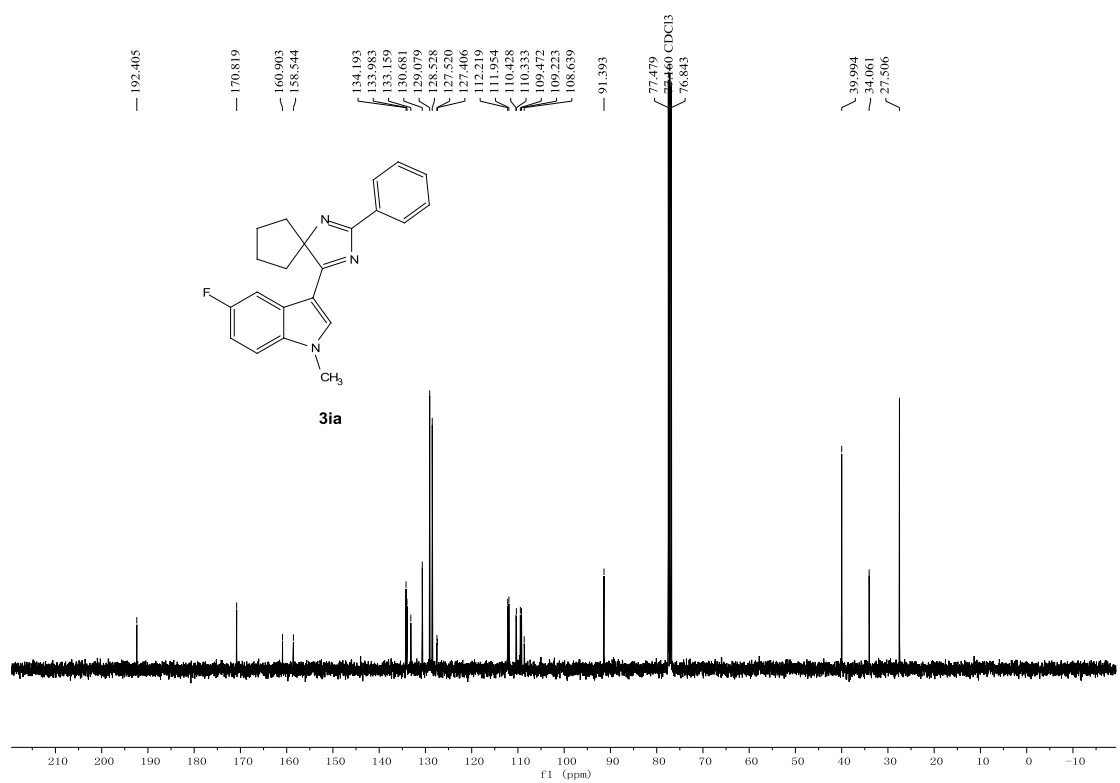

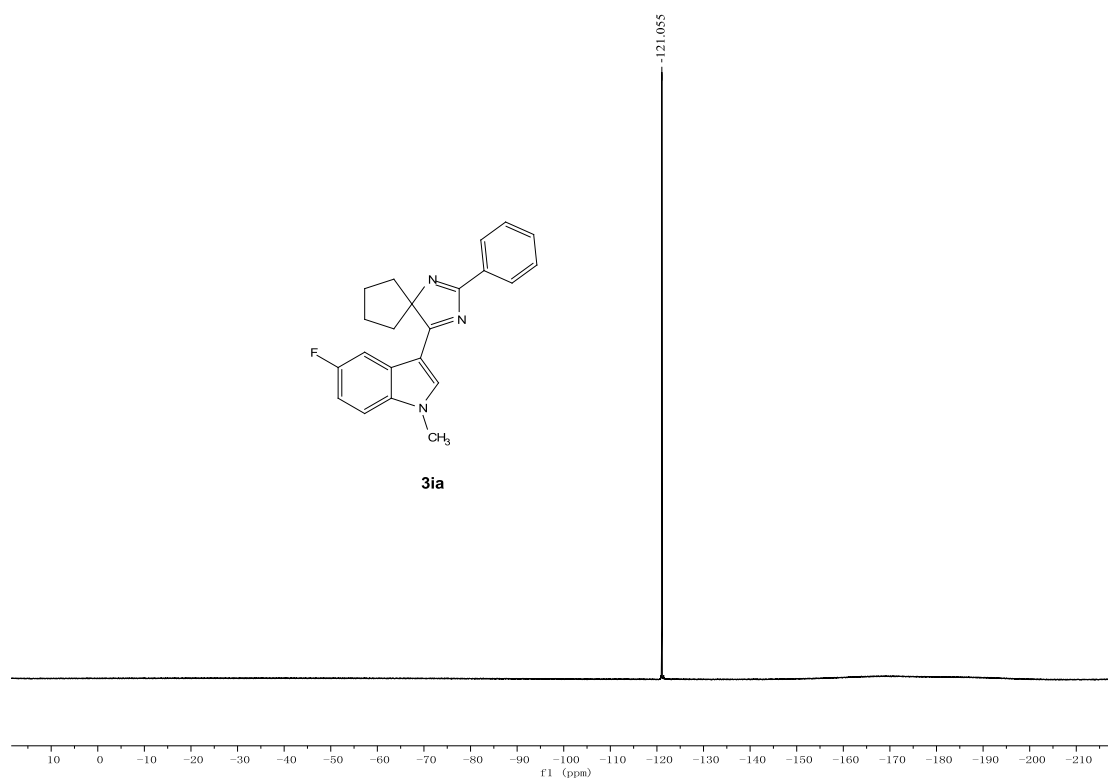

**$^1\text{H}$  NMR (400 MHz) and  $^{13}\text{C}$  NMR (100 MHz) spectra of **3ja** ( $\text{CDCl}_3$ )**

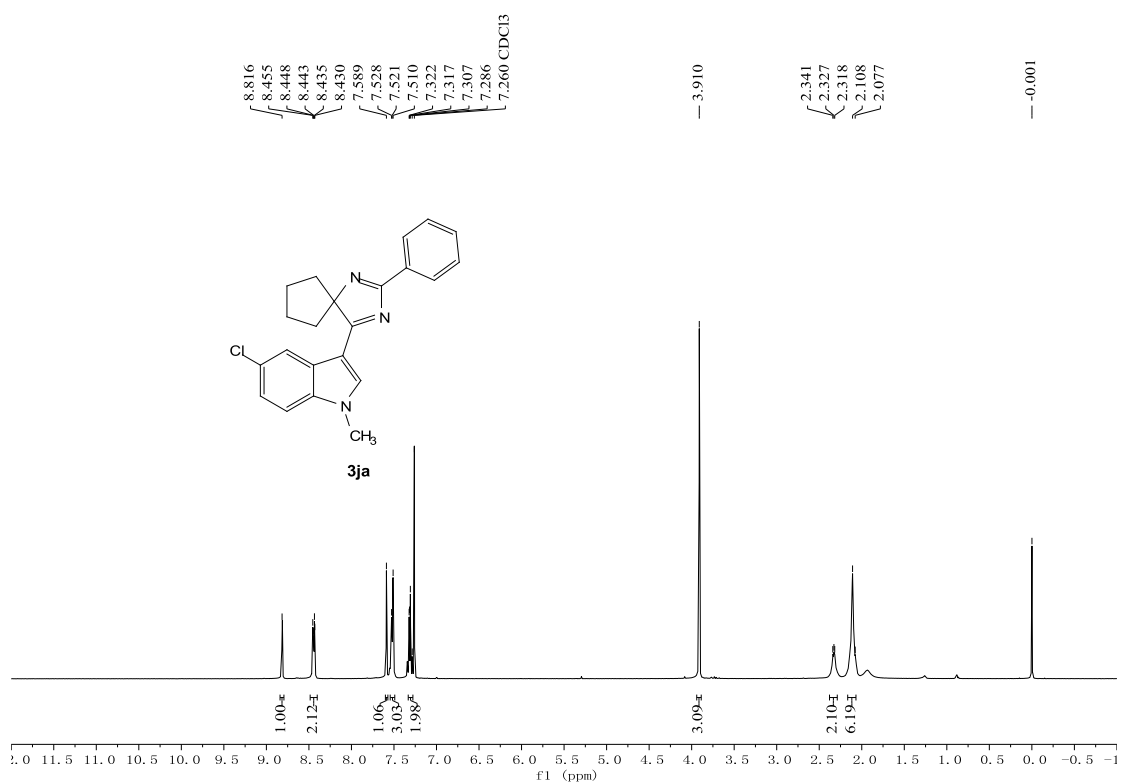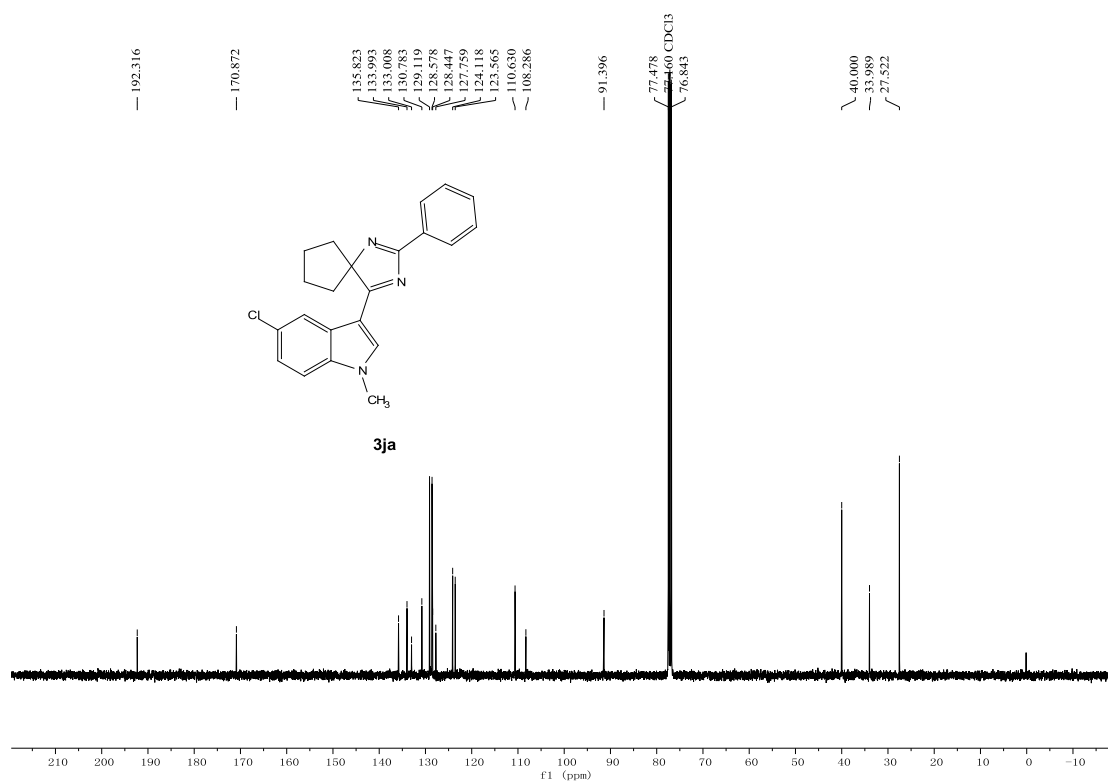

$^1\text{H}$  NMR (400 MHz) and  $^{13}\text{C}$  NMR (100 MHz) spectra of **3ka** ( $\text{CDCl}_3$ )

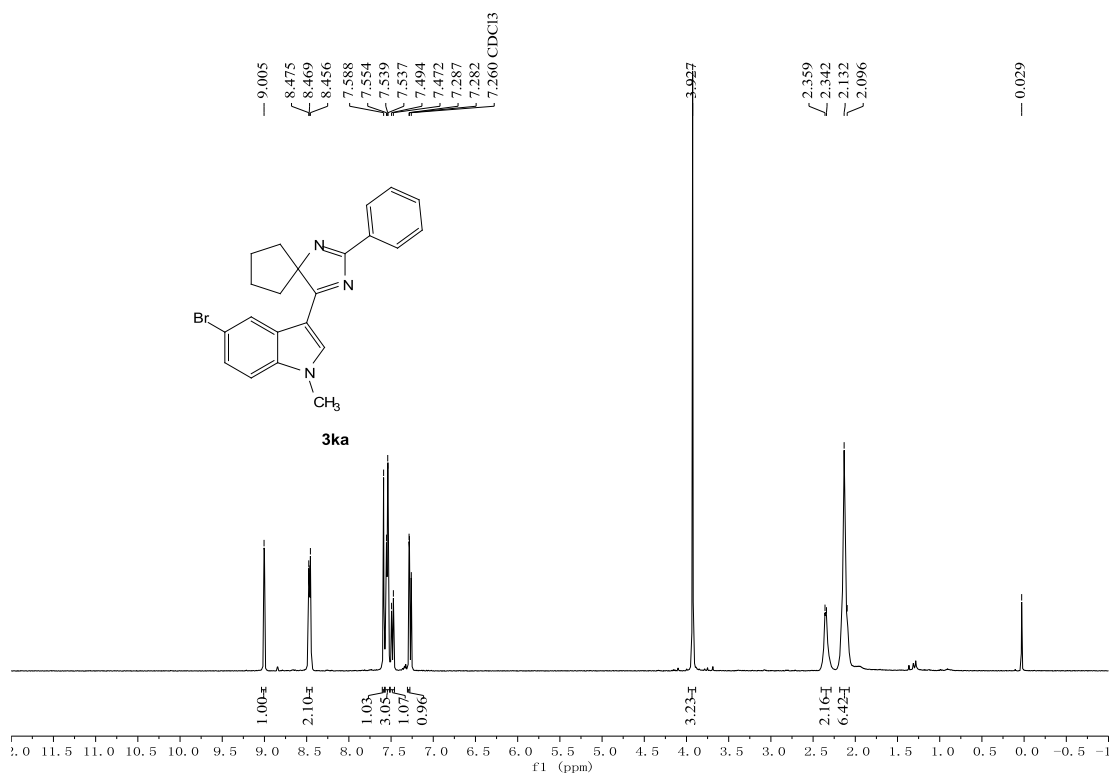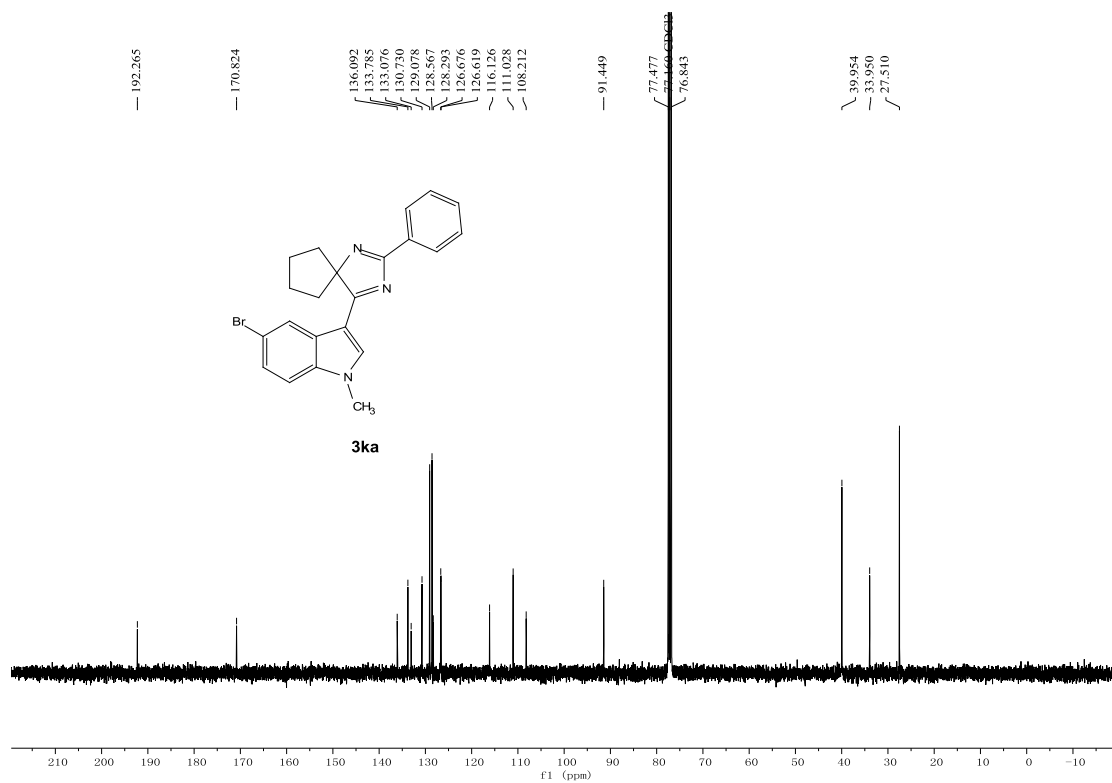

$^1\text{H}$  NMR (400 MHz) and  $^{13}\text{C}$  NMR (100 MHz) spectra of **3la** ( $\text{CDCl}_3$ )

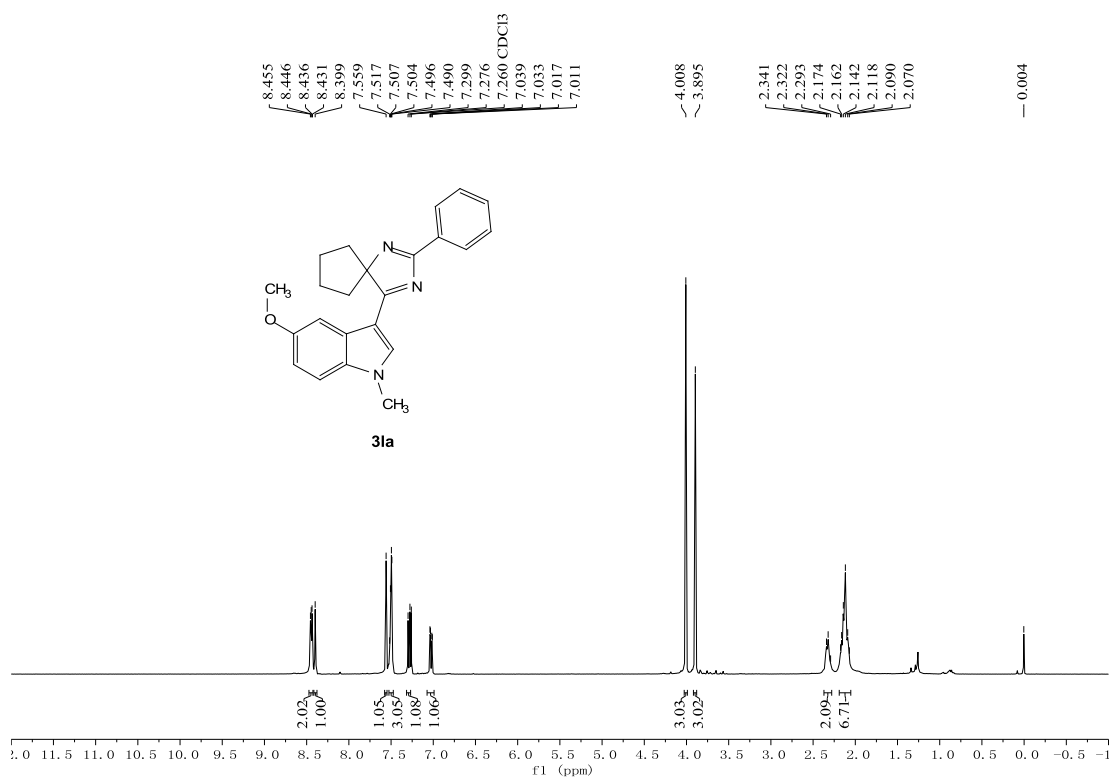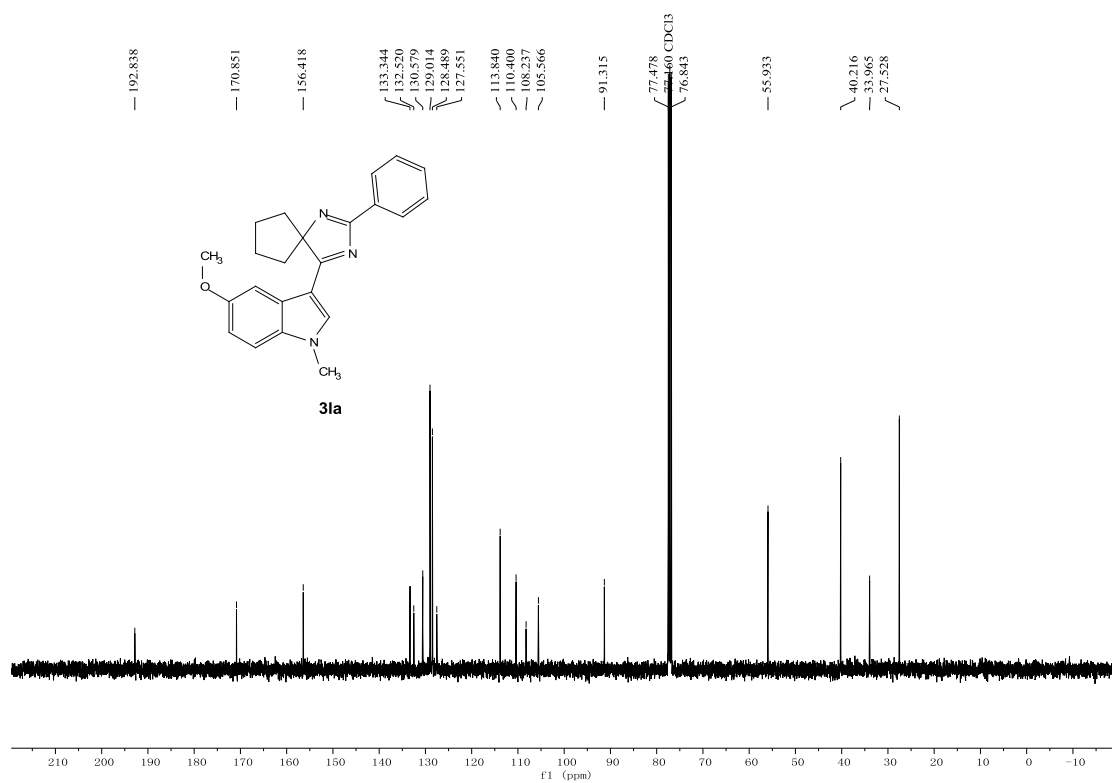

$^1\text{H}$  NMR (400 MHz) and  $^{13}\text{C}$  NMR (100 MHz) spectra of **3ma** ( $\text{CDCl}_3$ )

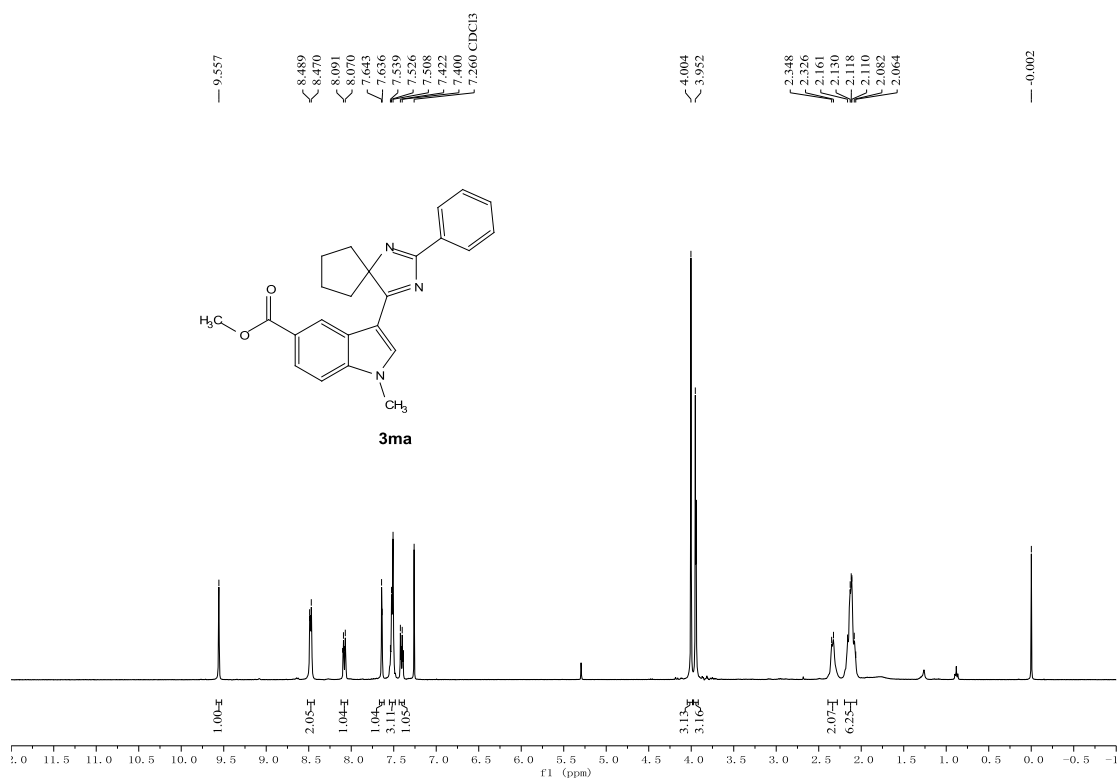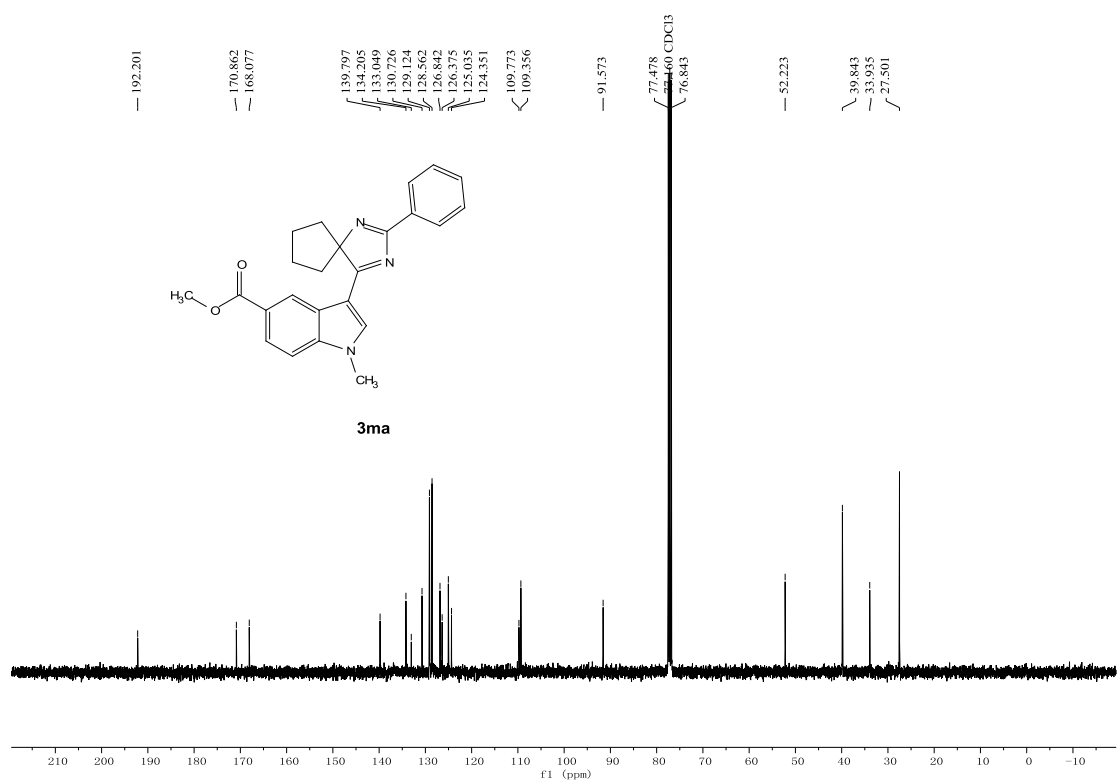

**$^1\text{H}$  NMR (400 MHz) and  $^{13}\text{C}$  NMR (100 MHz) spectra of **3na** ( $\text{CDCl}_3$ )**

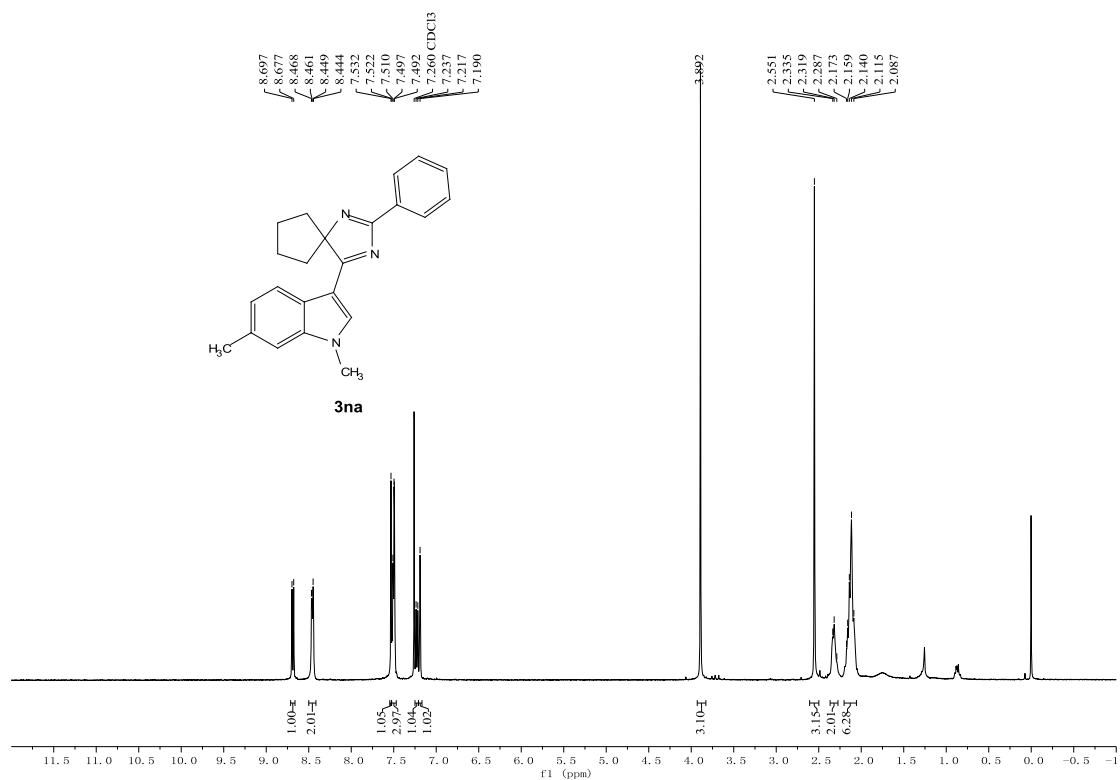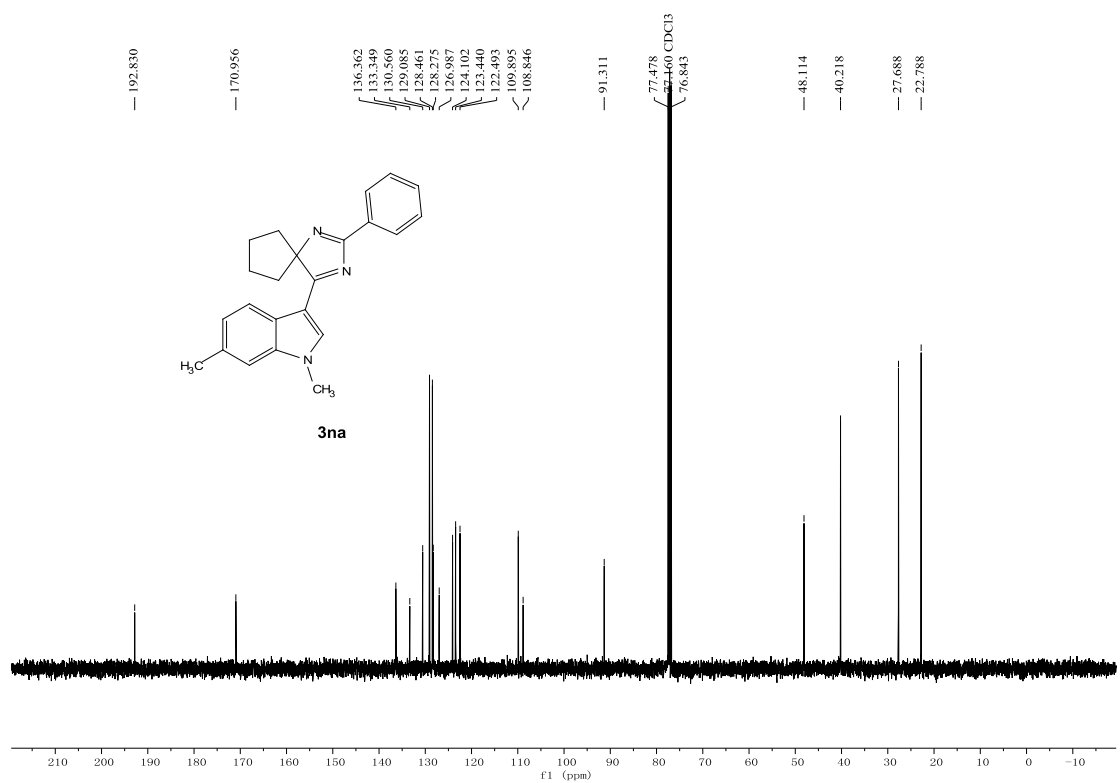

**$^1\text{H}$  NMR (400 MHz) and  $^{13}\text{C}$  NMR (100 MHz) spectra of **3oa** ( $\text{CDCl}_3$ )**

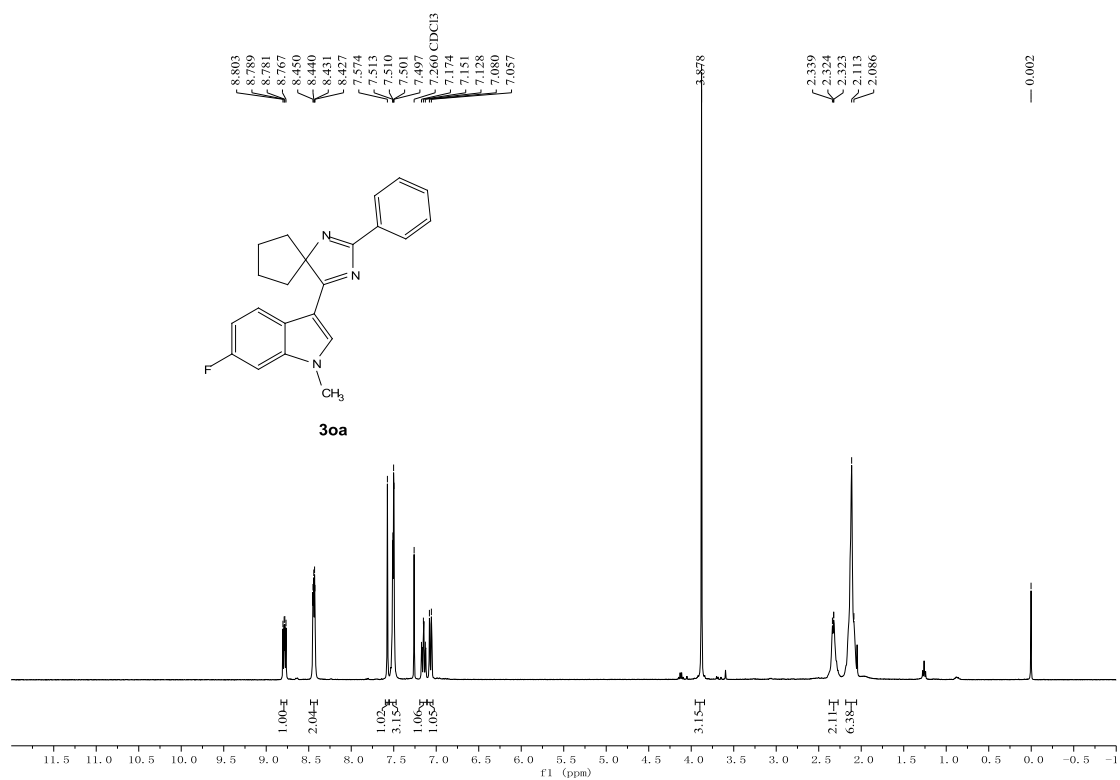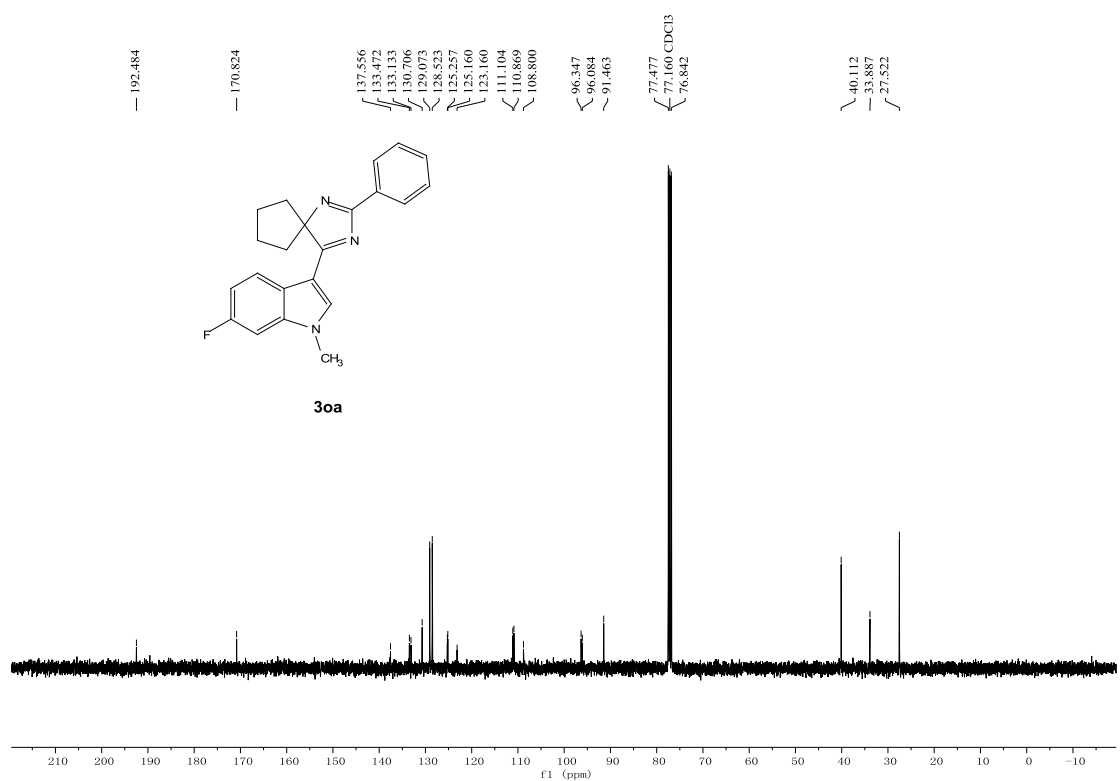

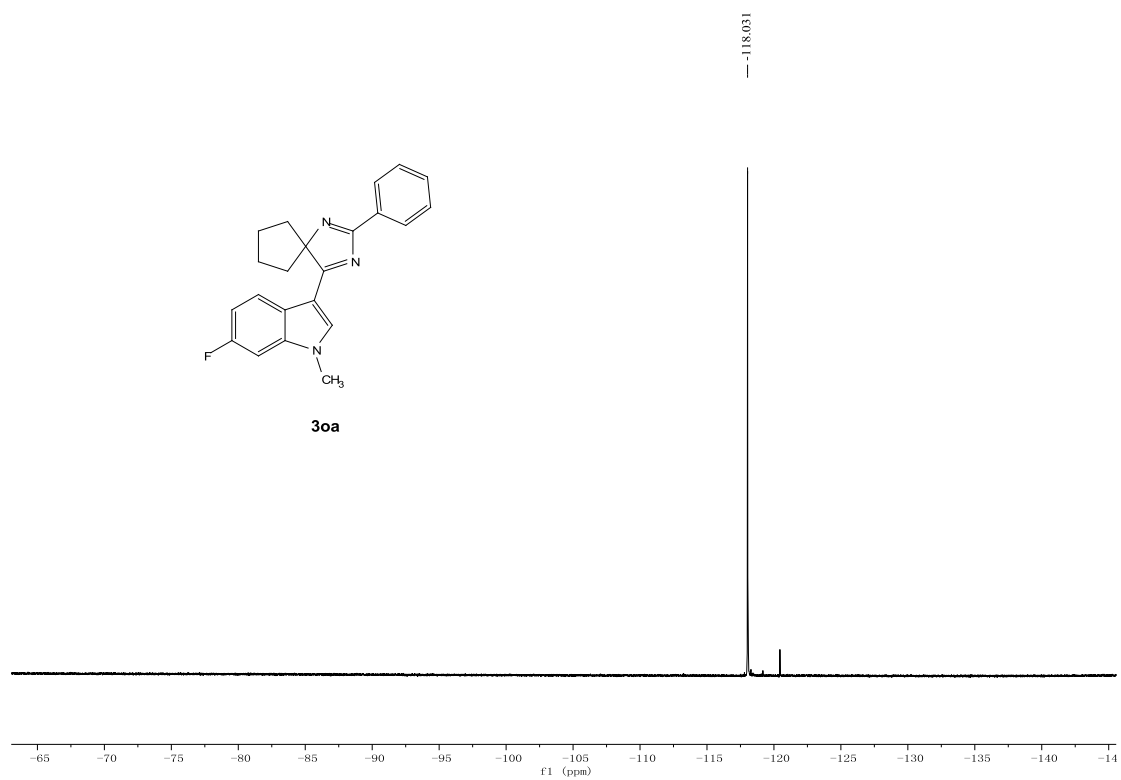

$^1\text{H}$  NMR (400 MHz) and  $^{13}\text{C}$  NMR (100 MHz) spectra of **3pa** ( $\text{CDCl}_3$ )

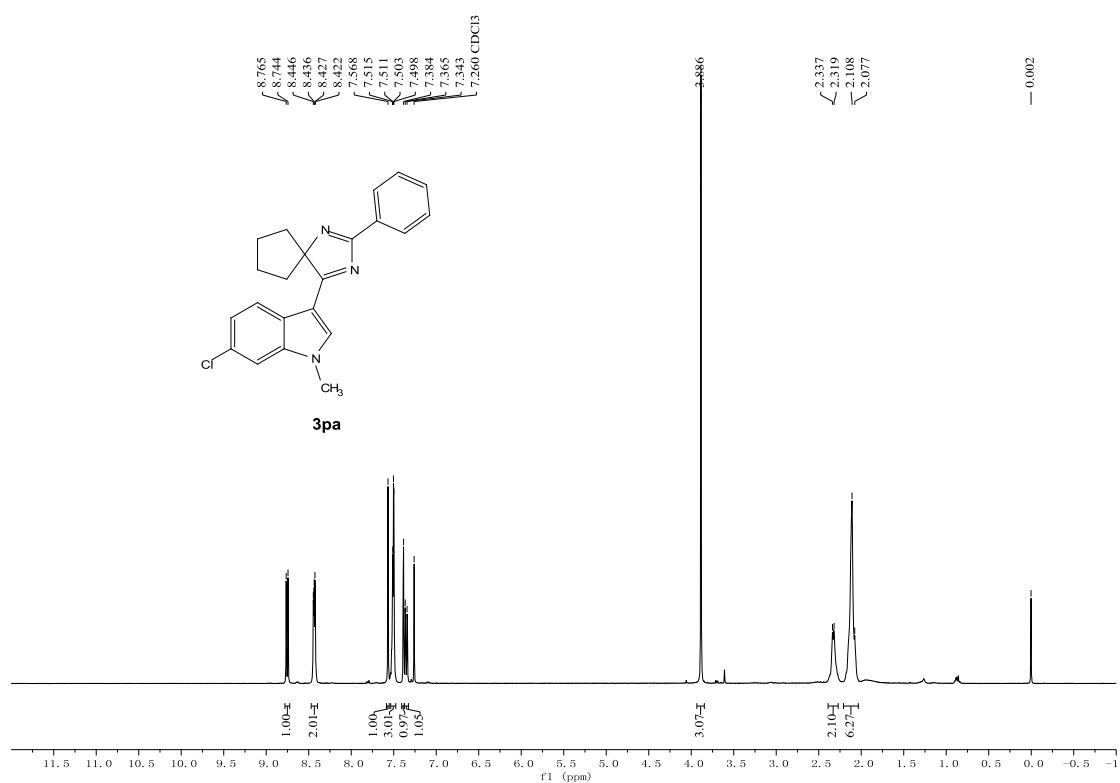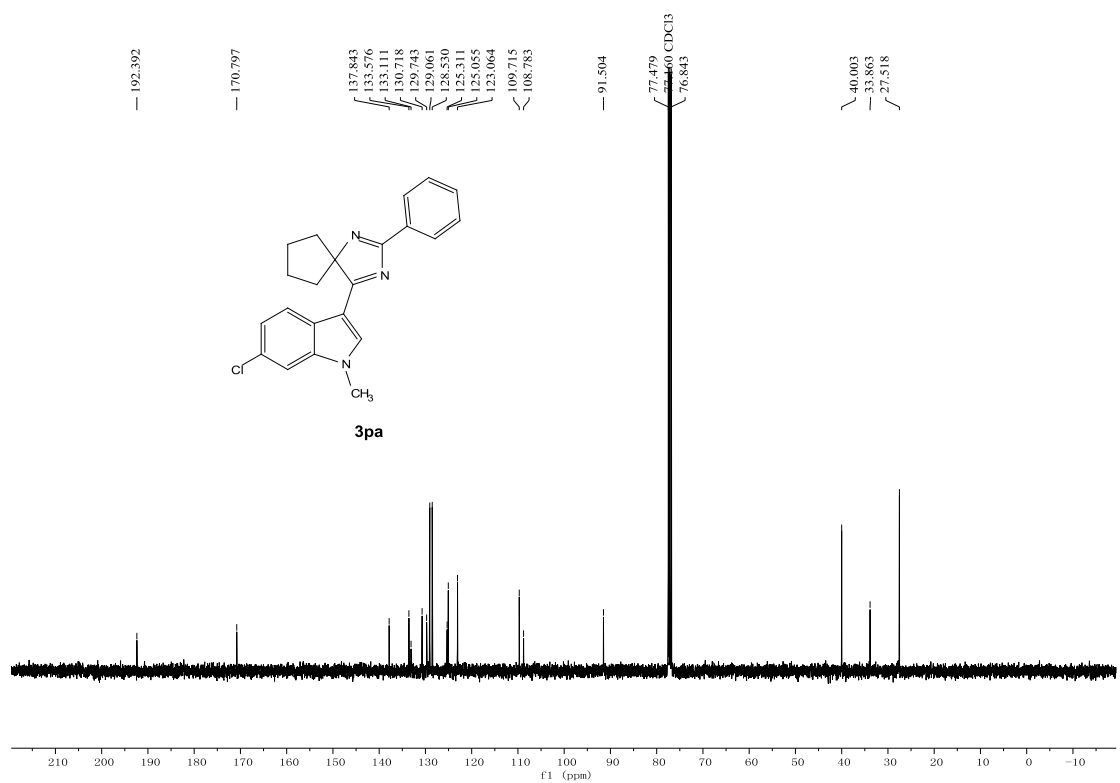

$^1\text{H}$  NMR (400 MHz) and  $^{13}\text{C}$  NMR (100 MHz) spectra of **3qa** ( $\text{CDCl}_3$ )

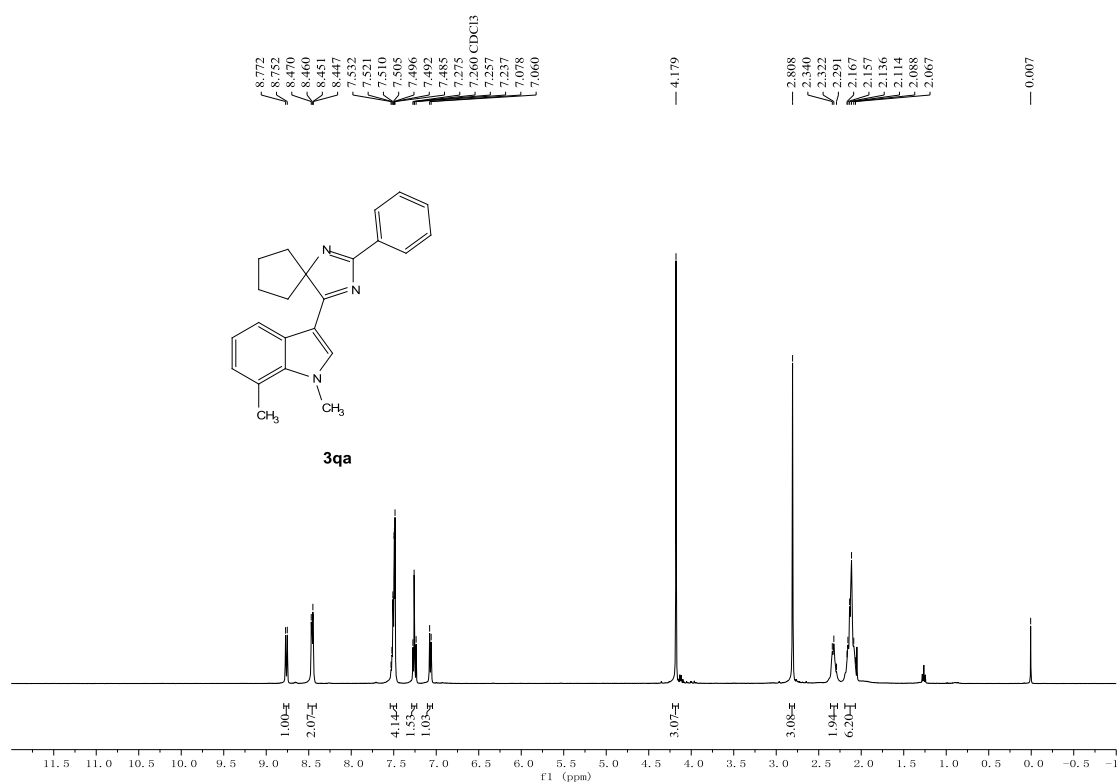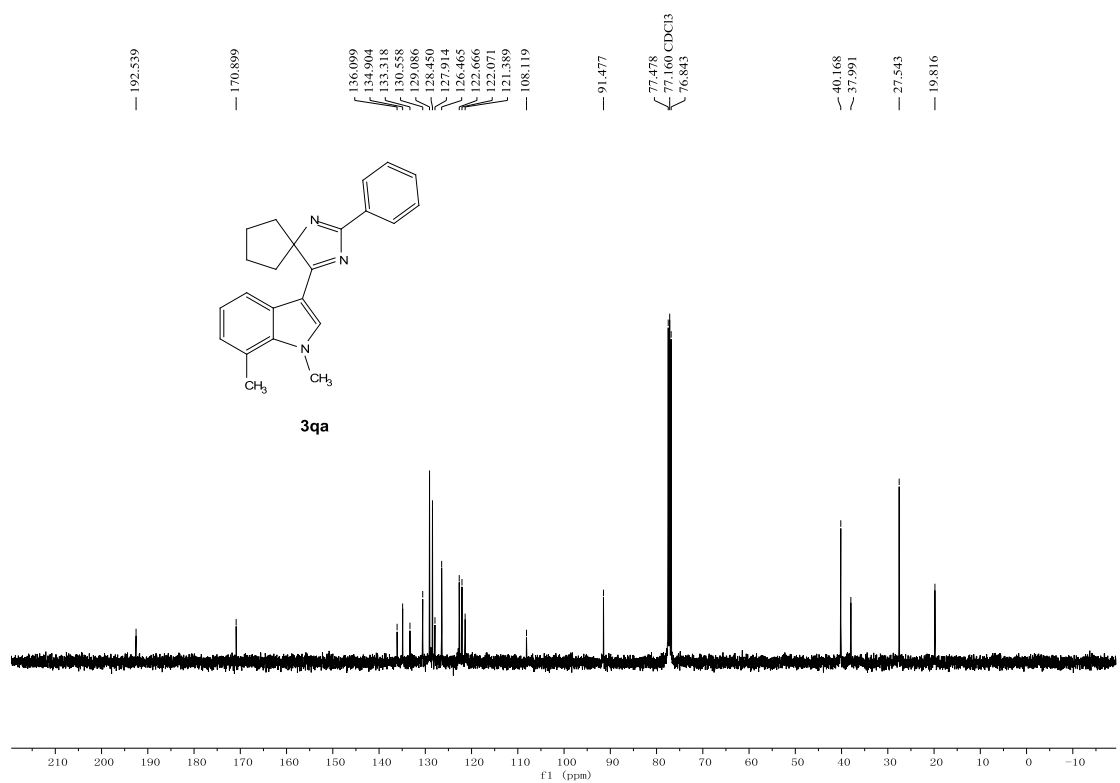

$^1\text{H}$  NMR (400 MHz) and  $^{13}\text{C}$  NMR (100 MHz) spectra of **3ra** ( $\text{CDCl}_3$ )

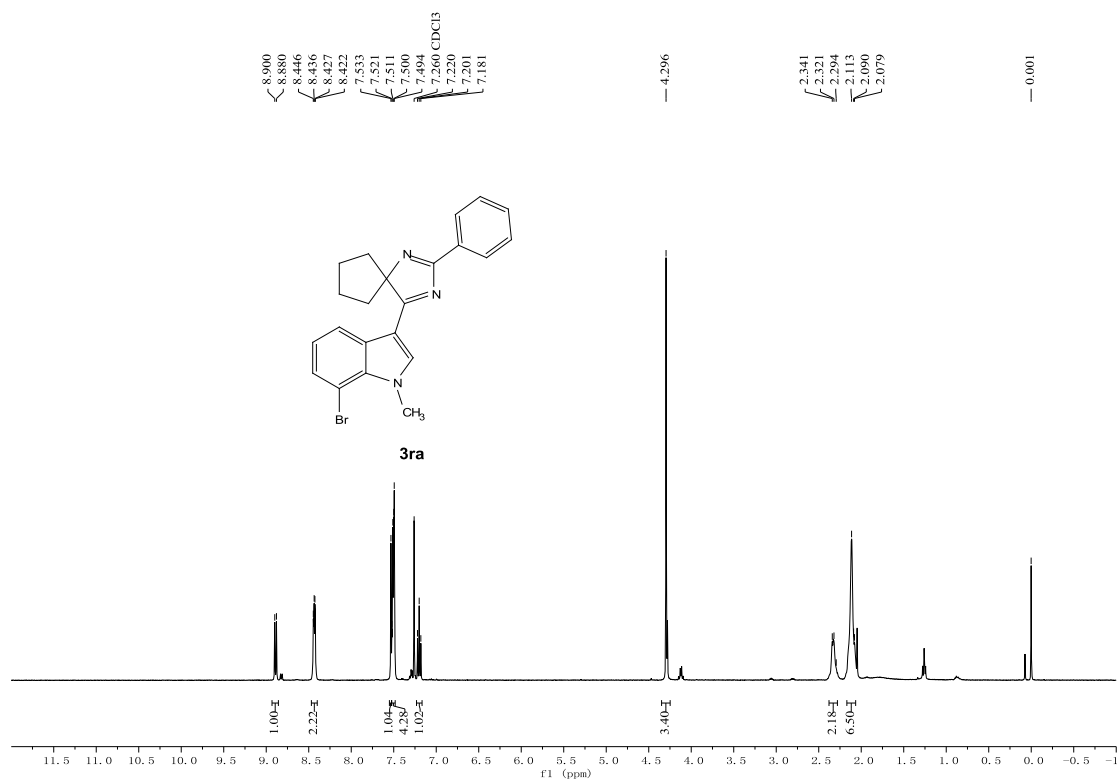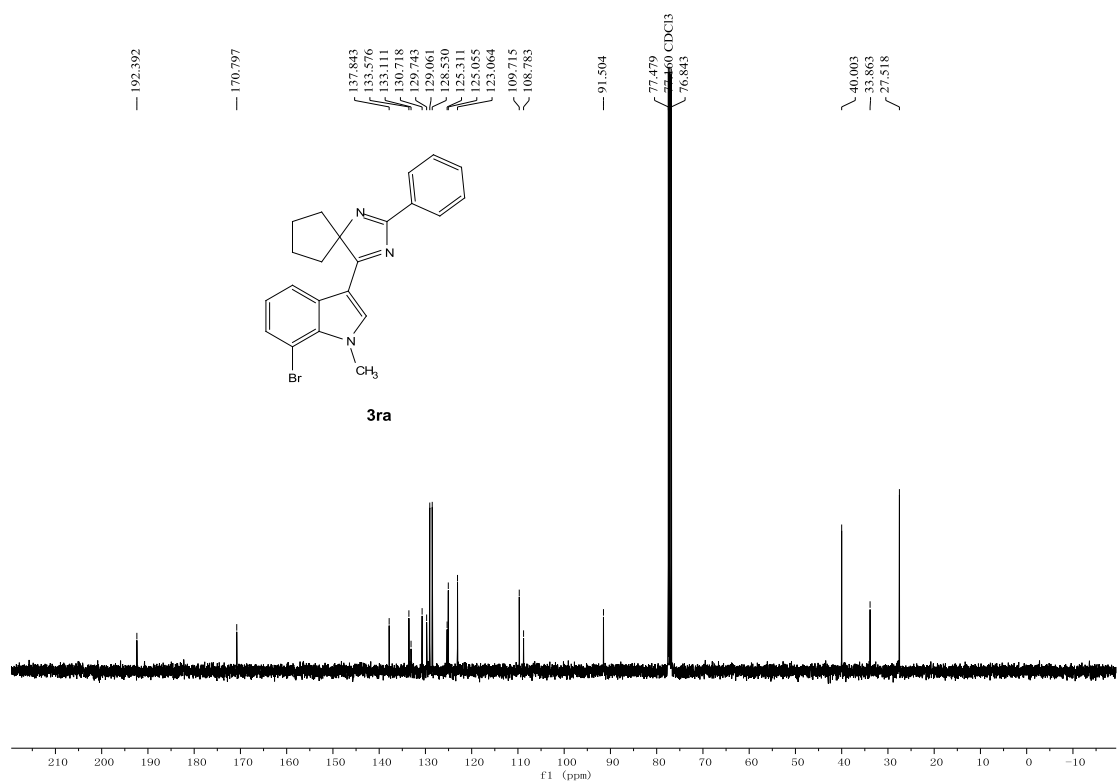

$^1\text{H}$  NMR (400 MHz) and  $^{13}\text{C}$  NMR (100 MHz) spectra of **3sa** ( $\text{CDCl}_3$ )

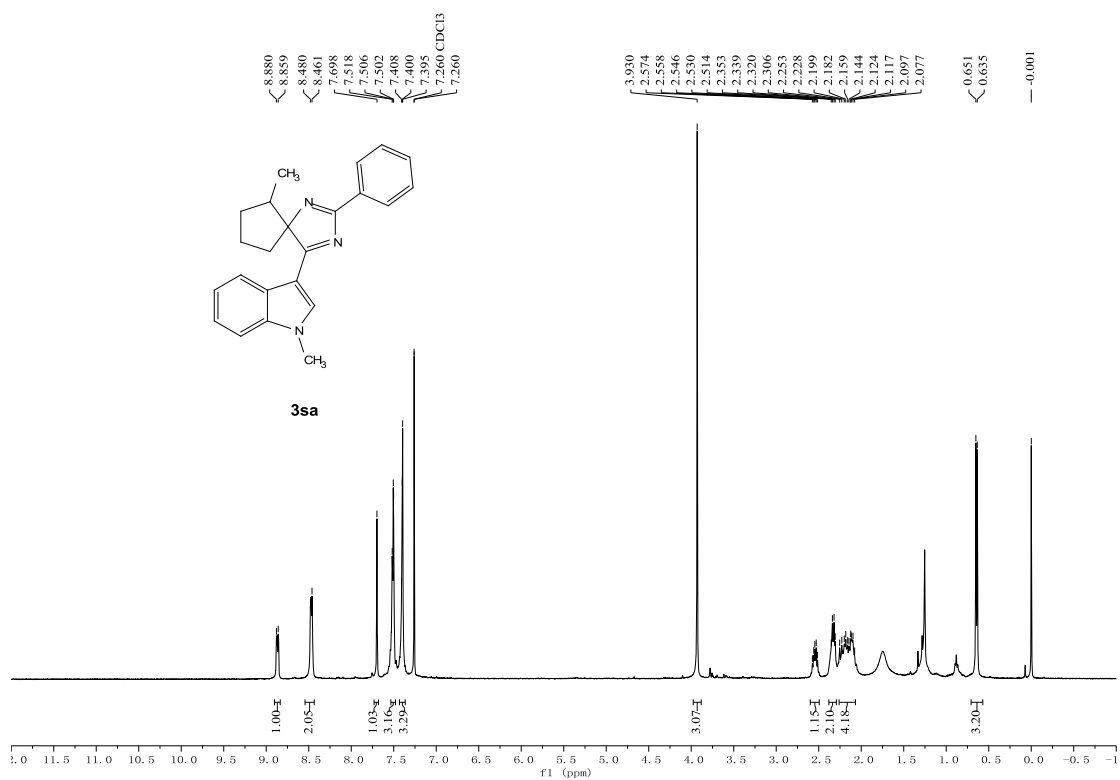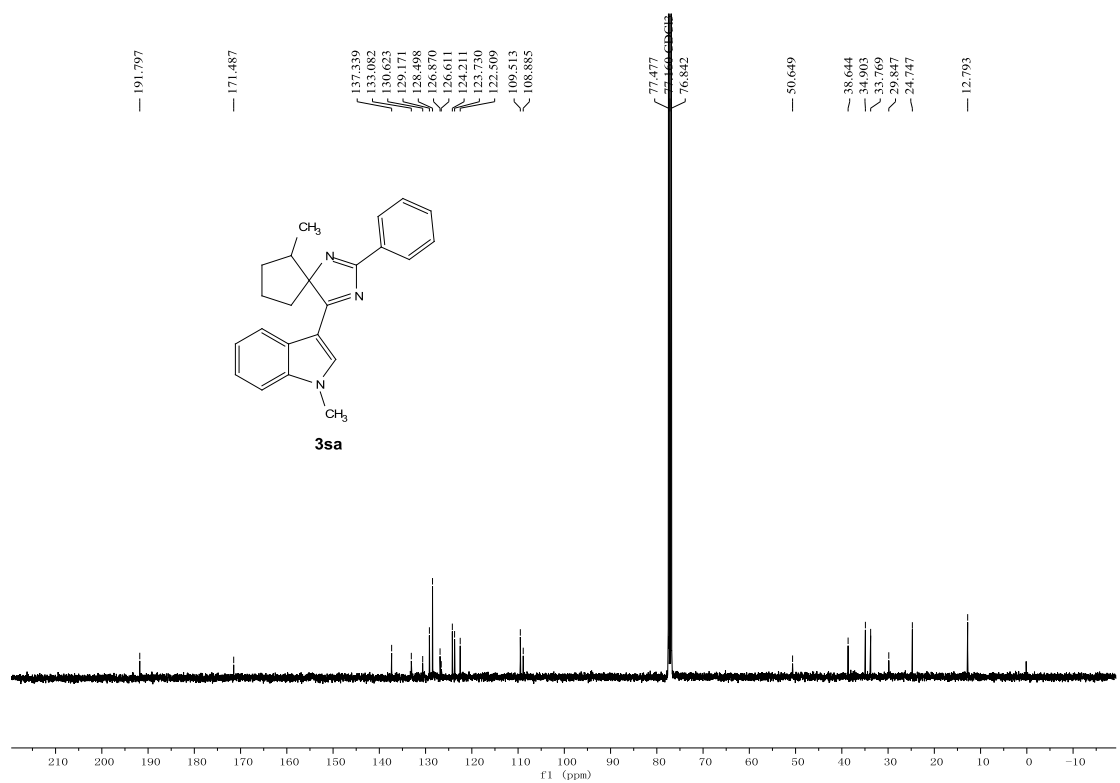

Supplement: d2qo01237e1.pdf [file d2qo01237e1.pdf]
